# Supplementary material for: Reductive radical-initiated 1,2-C migration assisted by an azidyl group
Source: Royal Society of Chemistry journal article supplement (doi:10.1039/d0sc02559c), 2020-01-01
Supplement: d0sc02559c1.pdf [file d0sc02559c1.pdf]

Supporting Information For:

## Reductive radical-initiated 1,2-C migration assisted by azidyl group

Xueying Zhang,<sup>†a</sup> Zhansong Zhang,<sup>†a</sup> Jin-Na Song,<sup>\*b</sup> and Zikun Wang<sup>\*a</sup>

<sup>a</sup> Jilin Province Key Laboratory of Organic Functional Molecular Design & Synthesis,  
Department of Chemistry, Northeast Normal University, Changchun 130024, China. <sup>b</sup> School of  
Life Science, Jilin University, Changchun 130012, China.

Email: [wangzk076@nenu.edu.cn](mailto:wangzk076@nenu.edu.cn); [songjn2010@jlu.edu.cn](mailto:songjn2010@jlu.edu.cn)

### Contents

|                                                                    |    |
|--------------------------------------------------------------------|----|
| 1. General Information .....                                       | 2  |
| 2. Optimization of Reaction Conditions.....                        | 2  |
| 3. Typical Procedure for Synthesis of Substrates and Products..... | 4  |
| 4. Investigation of mechanism.....                                 | 18 |
| 5. X-ray Structure of <b>3an</b> and <b>3ba</b> .....              | 25 |
| 6. NMR Spectra of the Products .....                               | 27 |
| 7. References .....                                                | 81 |

## 1. General Information

**Reagents and Instruments:** All reagents were purchased from commercial sources and used without purification unless otherwise mentioned. The products were purified by column chromatography over silica gel (300-400 size).  $^1\text{H}$ ,  $^{13}\text{C}$  Nuclear Magnetic Resonance (NMR) spectra were recorded at 25 °C on a Bruker 600 MHz, 150 MHz, and TMS was used as internal standard. High resolution mass spectra (HRMS) were recorded on Bruker microTof by using ESI method.

## 2. Optimization of Reaction Conditions

Table S1. Optimization of the reaction conditions<sup>a</sup>

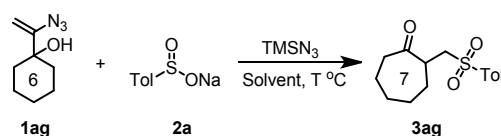

| entry     | $\text{TMSN}_3$ | <b>2a</b>    | solvent                                                 | $T$ (°C)  | yield (%) <sup>b</sup> |
|-----------|-----------------|--------------|---------------------------------------------------------|-----------|------------------------|
| 1         | 4 eq.           | 4 eq.        | DMSO:H <sub>2</sub> O/2:1                               | 50        | 58                     |
| 2         | 4 eq.           | 4 eq.        | DMSO:H <sub>2</sub> O/3:1                               | 50        | 55                     |
| 3         | 4 eq.           | 4 eq.        | DMSO:H <sub>2</sub> O/1:1                               | 50        | 49                     |
| 4         | 4 eq.           | 4 eq.        | DMF:H <sub>2</sub> O/2:1                                | 50        | 38                     |
| 5         | 4 eq.           | 4 eq.        | NMP:H <sub>2</sub> O/2:1                                | 50        | 41                     |
| 6         | 4 eq.           | 4 eq.        | DCM:H <sub>2</sub> O/2:1                                | 50        | 0 <sup>c</sup>         |
| 7         | 4 eq.           | 4 eq.        | CH <sub>3</sub> CN:H <sub>2</sub> O/2:1                 | 50        | 43                     |
| 8         | 4 eq.           | 4 eq.        | CH <sub>3</sub> CH <sub>2</sub> OH:H <sub>2</sub> O/2:1 | 50        | 52                     |
| 9         | 4 eq.           | 4 eq.        | DMSO:H <sub>2</sub> O/2:1                               | 70        | 44                     |
| 10        | 4 eq.           | 4 eq.        | DMSO:H <sub>2</sub> O/2:1                               | 30        | 54                     |
| 11        | 3 eq.           | 4 eq.        | DMSO:H <sub>2</sub> O/2:1                               | 50        | 56                     |
| 12        | 4 eq.           | 3 eq.        | DMSO:H <sub>2</sub> O/2:1                               | 50        | 39                     |
| <b>13</b> | <b>4 eq.</b>    | <b>6 eq.</b> | <b>DMSO:H<sub>2</sub>O/2:1</b>                          | <b>50</b> | <b>65</b>              |
| 14        | 4 eq.           | 7 eq.        | DMSO:H <sub>2</sub> O/2:1                               | 50        | 64                     |

<sup>a</sup> Standard reaction conditions: **1ag** (0.5 mmol),  $\text{TMSN}_3$  (2.0 mmol), **2a** (3.0 mmol), in H<sub>2</sub>O (0.7 mL) and DMSO (1.4 mL) at 50 °C under air for 48 h. <sup>b</sup> Yield of isolated product. <sup>c</sup> No **3ag** was detected by  $^1\text{H}$  NMR analysis of crude product. DCM = dichloromethane, DMSO = dimethyl sulfoxide, NMP = *N*-methyl pyrrolidone

To probe the feasibility of our proposed reaction, we investigated the reaction of 2-azidoallyl alcohols **1ag** with sodium *p*-toluenesulfonate **2a** in the presence of  $\text{TMSN}_3$  in a DMSO/H<sub>2</sub>O cosolvent system at 50 °C (Table S1, entry 1). Gratifyingly, after 48 h, the 1,2-migration product was isolated in 58% yield. We then optimized the other reaction parameters, including solvent, temperature and the amount of  $\text{TMSN}_3$  and **2a**. Except for dichloromethane (DCM), the cosolvents of H<sub>2</sub>O with dimethylsulfoxide (DMSO), dimethylformamide (DMF), *N*-methyl-2-

pyrrolidone (NMP), acetonitrile, or ethyl alcohol all afforded the desired product in moderate yields (entries 1-8). The yield decreased if the temperature was raised to 70 °C or reduced to 30 °C (entries 9 and 10). The reason might be that the quantity of byproducts was increased when the temperature was increased or lengthened the reaction time extended (**1ag** was not observed after 72 h at 30 °C). The amounts of **2a** and TMSN<sub>3</sub> also were also important, and the results listed in entries 11-14 demonstrated that the yield of **3ag** was the highest (65%) when four equivalents of TMSN<sub>3</sub> and six equivalents of **2a** were used. After systematic screening of the reaction parameters, the conditions listed in entry 13 were found to be optimum for this reductive 1,2-carbon migration reaction.

### 3. Typical Procedure for Synthesis of Substrates and Products

#### 3.1 Typical procedure for the preparation of 2-azidoallyl alcohols

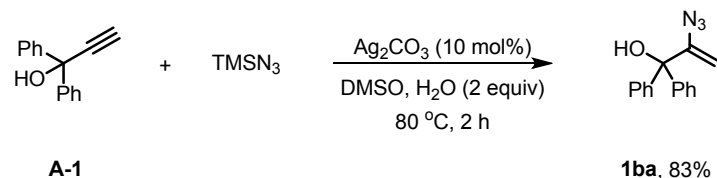

To a solution of ethynyl alcohol **A-1** (5.0 mmol, 1.041 g), TMSN<sub>3</sub> (7.5 mmol, 0.863 g), and H<sub>2</sub>O (10.0 mmol, 0.180 g) in DMSO (10 mL), Ag<sub>2</sub>CO<sub>3</sub> (0.5 mmol, 0.138 g) was added. The mixture was stirred at 80 °C for 2 h. Upon completion of the reaction, saturated NH<sub>4</sub>Cl (aq.) was added to quench the reaction and the mixture was extracted with CH<sub>2</sub>Cl<sub>2</sub> (3 × 50 mL). The combined organic layers were washed with brine, dried over MgSO<sub>4</sub>, filtered, and concentrated *in vacuo*. The resulting mixture was purified by silica gel column chromatography using (petroleum ether:ethyl acetate = 20:1) to afford 2-azidoallyl alcohol **1ba** (1.043 g, 83%).<sup>[1],[2]</sup>

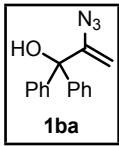 **2-Azido-1,1-diphenylprop-2-en-1-ol (1ba):** Yellow solid; m.p. 26-28 °C; <sup>1</sup>H NMR (600 MHz, CDCl<sub>3</sub>) δ 7.39-7.37 (m, 4H), 7.34-7.28 (m, 6H), 5.01 (d, *J* = 2.4 Hz, 1H), 4.71 (d, *J* = 1.8 Hz, 1H), 3.05 (s, 1H). <sup>13</sup>C NMR (150 MHz, CDCl<sub>3</sub>) δ 150.96, 143.17, 128.09, 127.90, 127.60, 102.11, 80.67. **HRMS** (ESI) *m/z* calculated for C<sub>15</sub>H<sub>13</sub>N<sub>3</sub>NaO [M+Na]<sup>+</sup> 274.0960, found 274.0956.

#### 3.2 Typical procedure for the radical-initiated reductive 1,2-carbon migration

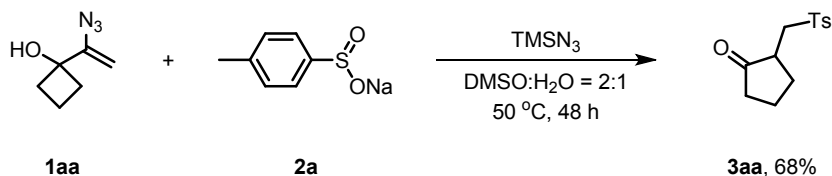

To a solution of 2-azidoallyl alcohol **1aa** (0.5 mmol, 0.070 g) and sodium *p*-tolylsulfinate (3.0 mmol, 0.534 g) in the co-solvent (DMSO 1.4 mL, H<sub>2</sub>O 0.7 mL), TMSN<sub>3</sub> (2.0 mmol, 0.230 g) was added. The mixture was stirred at 50 °C for 48 h. Upon completion of the reaction, saturated NH<sub>4</sub>Cl (aq.) was added to quench the reaction and the mixture was extracted with CH<sub>2</sub>Cl<sub>2</sub> (3 × 10 mL). The combined organic layers were washed with brine, dried over MgSO<sub>4</sub>, filtered, and concentrated *in vacuo*. The resulting mixture was purified by silica gel column chromatography using (petroleum ether:ethyl acetate = 6:1) to afford product **3aa** (0.086 g, 68%).

#### 3.3 Typical procedure for the 1,2-carbon migration from propargyl alcohols

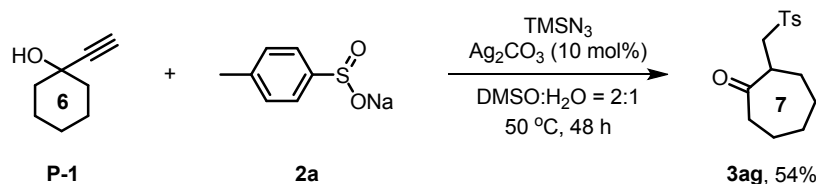

To a solution of propargyl alcohol **P-1** (0.5 mmol, 0.062 g),  $\text{Ag}_2\text{CO}_3$  (0.05 mmol, 0.014 g) and sodium *p*-tolylsulfinate (3.0 mmol, 0.534 g) in the co-solvent (DMSO 1.4 mL,  $\text{H}_2\text{O}$  0.7 mL),  $\text{TMSN}_3$  (2.0 mmol, 0.230 g) was added. The mixture was stirred at 50 °C for 48 h. Upon completion of the reaction, saturated  $\text{NH}_4\text{Cl}$  (aq.) was added to quench the reaction and the mixture was extracted with  $\text{CH}_2\text{Cl}_2$  ( $3 \times 10$  mL). The combined organic layers were washed with brine, dried over  $\text{MgSO}_4$ , filtered, and concentrated *in vacuo*. The resulting mixture was purified by silica gel column chromatography using (petroleum ether:ethyl acetate = 6:1) to afford product **3ag** (0.076 g, 54%).

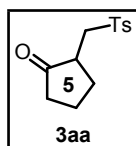

**2-(Tosylmethyl)cyclopentanone (3aa):** Yellow oil;  $^1\text{H}$  NMR (600 MHz,  $\text{CDCl}_3$ )  $\delta$  7.80 (d,  $J = 8.2$  Hz, 2H), 7.37 (d,  $J = 8.2$  Hz, 2H), 3.64 (dd,  $J = 14.2, 1.8$  Hz, 1H), 2.91 (dd,  $J = 14.2, 10.2$  Hz, 1H), 2.60-2.55 (m, 2H), 2.46 (s, 3H), 2.40-2.33 (m, 1H), 2.15-2.04 (m, 2H), 1.88-1.76 (m, 1H), 1.72-1.58 (m, 1H).  $^{13}\text{C}$  NMR (150 MHz,  $\text{CDCl}_3$ )  $\delta$  216.63, 144.94, 136.49, 130.03, 127.91, 56.68, 44.15, 36.72, 29.96, 21.66, 20.58. **HRMS** (ESI)  $m/z$  calculated for  $\text{C}_{13}\text{H}_{16}\text{NaO}_3\text{S}$   $[\text{M}+\text{Na}]^+$  275.0712, found 275.0708.

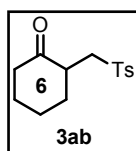

**2-(Tosylmethyl)cyclohexanone (3ab):** Yellow oil;  $^1\text{H}$  NMR (600 MHz,  $\text{CDCl}_3$ )  $\delta$  7.78 (d,  $J = 8.2$  Hz, 2H), 7.35 (d,  $J = 8.2$  Hz, 2H), 3.87 (dd,  $J = 14.4, 3.6$  Hz, 1H), 3.07-3.02 (m, 1H), 2.82 (dd,  $J = 14.4, 7.7$  Hz, 1H), 2.59-2.55 (m, 1H), 2.45 (s, 3H), 2.43-2.40 (m, 1H), 2.38-2.32 (m, 1H), 2.14-2.01 (m, 1H), 1.91-1.88 (m, 1H), 1.82-1.70 (m, 1H), 1.67-1.58 (m, 1H), 1.47 (qd,  $J = 12.9, 3.6$  Hz, 1H).  $^{13}\text{C}$  NMR (150 MHz,  $\text{CDCl}_3$ )  $\delta$  208.43, 144.74, 136.99, 129.93, 127.80, 55.42, 45.19, 41.85, 34.79, 27.73, 25.08, 21.65. **HRMS** (ESI)  $m/z$  calculated for  $\text{C}_{14}\text{H}_{18}\text{NaO}_3\text{S}$   $[\text{M}+\text{Na}]^+$  289.0869, found 289.0863.

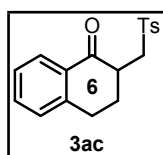

**2-(Tosylmethyl)-3,4-dihydronaphthalen-1(2H)-one (3ac):** Yellow solid; m.p: 97-98 °C;  $^1\text{H}$  NMR (600 MHz,  $\text{CDCl}_3$ )  $\delta$  7.89 (d,  $J = 7.8$  Hz, 1H), 7.77 (d,  $J = 8.2$  Hz, 2H), 7.44-7.38 (m, 1H), 7.30 (d,  $J = 8.2$  Hz, 2H), 7.22 (t,  $J = 7.6$  Hz, 1H), 7.20-7.16 (m, 1H), 4.08 (dd,  $J = 14.4, 2.2$  Hz, 1H), 3.08-3.02 (m, 2H), 2.98-2.89 (m, 2H), 2.76-2.69 (m, 1H), 2.38 (s, 3H), 1.95 (qd,  $J = 13.2, 4.2$  Hz, 1H).  $^{13}\text{C}$  NMR (150 MHz,  $\text{CDCl}_3$ )  $\delta$  195.79, 144.85, 143.91, 136.81, 133.90, 131.61, 130.03, 128.90, 127.91, 127.75, 126.80, 55.74, 43.11, 29.37, 28.98, 21.67. **HRMS** (ESI)  $m/z$  calculated for  $\text{C}_{18}\text{H}_{18}\text{NaO}_3\text{S}$   $[\text{M}+\text{Na}]^+$  337.0869, found 337.0873.

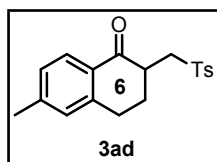

**6-Methyl-2-(tosylmethyl)-3,4-dihydronaphthalen-1(2H)-one (3ad):** Yellow solid; m.p: 49-50 °C;  $^1\text{H}$  NMR (600 MHz,  $\text{CDCl}_3$ )  $\delta$  7.86 (d,  $J = 7.8$  Hz, 1H), 7.84 (d,  $J = 8.0$  Hz, 2H), 7.36 (d,  $J = 8.0$  Hz, 2H), 7.09 (d,  $J = 7.8$  Hz, 1H), 7.05 (s, 1H), 4.15 (dd,  $J = 14.4, 2.0$  Hz, 1H), 3.12-3.04 (m, 2H), 3.02-2.98 (m, 1H), 2.94 (dt,  $J = 16.8, 3.6$  Hz, 1H), 2.80-2.74 (m, 1H), 2.45 (s, 3H), 2.37 (s, 3H), 2.04-1.95 (m, 1H).  $^{13}\text{C}$  NMR (150 MHz,  $\text{CDCl}_3$ )  $\delta$  195.44, 144.87, 144.80, 143.98, 136.84, 130.01, 129.30, 129.28, 127.90, 127.85, 127.82, 55.79, 43.03, 29.42, 28.94, 21.75, 21.66. **HRMS** (ESI)  $m/z$  calculated for  $\text{C}_{19}\text{H}_{20}\text{NaO}_3\text{S}$   $[\text{M}+\text{Na}]^+$  351.1034, found 351.1025.

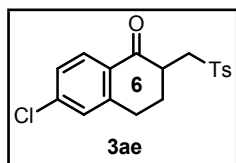**6-Chloro-2-(tosylmethyl)-3,4-dihydronaphthalen-1(2H)-one (3ae):**

Yellow solid; m.p: 71-72 °C; <sup>1</sup>H NMR (600 MHz, CDCl<sub>3</sub>) δ 7.91 (d, *J* = 8.0 Hz, 1H), 7.84 (d, *J* = 8.0 Hz, 2H), 7.38 (d, *J* = 8.0 Hz, 2H), 7.29-7.25 (m, 2H), 4.12 (dd, *J* = 14.4, 2.0 Hz, 1H), 3.16-3.10 (m, 2H), 3.07-2.94 (m, 2H), 2.84-2.76 (m, 1H), 2.46 (s, 3H), 2.02 (qd, *J* = 13.0, 4.2 Hz, 1H). <sup>13</sup>C

NMR (150 MHz, CDCl<sub>3</sub>) δ 194.78, 145.44, 144.94, 140.30, 136.76, 130.06, 130.04, 129.44, 128.77, 127.90, 127.39, 55.61, 42.97, 29.10, 28.83, 21.68. **HRMS** (ESI) *m/z* calculated for C<sub>18</sub>H<sub>17</sub>ClNaO<sub>3</sub>S [M+Na]<sup>+</sup> 371.0479, found 371.0483.

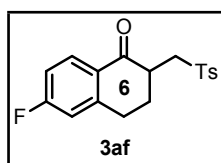**6-Fluoro-2-(tosylmethyl)-3,4-dihydronaphthalen-1(2H)-one (3af):**

Yellow oil; <sup>1</sup>H NMR (600 MHz, CDCl<sub>3</sub>) δ 8.00 (dd, *J* = 8.6, 6.0 Hz, 1H), 7.84 (d, *J* = 8.0 Hz, 2H), 7.38 (d, *J* = 8.0 Hz, 2H), 6.98 (td, *J* = 8.6, 2.0 Hz, 1H), 6.93 (d, *J* = 9.0 Hz, 1H), 4.13 (dd, *J* = 14.4, 2.0 Hz, 1H), 3.16-3.10 (m, 2H), 3.04-2.97 (m, 2H), 2.82-2.78 (m, 1H), 2.46 (s, 3H), 2.02 (qd, *J* = 13.2,

4.2 Hz, 1H). <sup>13</sup>C NMR (150 MHz, CDCl<sub>3</sub>) δ 194.32, 165.96 (d, *J* = 253.5 Hz), 146.99 (d, *J* = 9.2 Hz), 144.89, 136.81, 130.95 (d, *J* = 9.9 Hz), 130.04, 128.27 (d, *J* = 2.6 Hz), 127.89, 115.20 (d, *J* = 21.5 Hz), 114.60 (d, *J* = 22.1 Hz), 55.64, 42.87, 29.16, 29.12, 21.66. **HRMS** (ESI) *m/z* calculated for C<sub>18</sub>H<sub>17</sub>FNaO<sub>3</sub>S [M+Na]<sup>+</sup> 355.0775, found 355.0778.

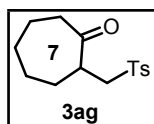**2-(Tosylmethyl)cycloheptanone (3ag):** White solid; m.p: 58-59 °C; <sup>1</sup>H NMR

(600 MHz, CDCl<sub>3</sub>) δ 7.77 (d, *J* = 8.0 Hz, 2H), 7.35 (d, *J* = 8.0 Hz, 2H), 3.83 (dd, *J* = 14.2, 6.0 Hz, 1H), 3.35-3.28 (m, 1H), 2.96 (dd, *J* = 14.2, 6.0 Hz, 1H), 2.59 (dt, *J* = 16.0, 4.8 Hz, 1H), 2.45 (s, 3H), 2.43-2.38 (m, 1H), 2.05-1.98 (m, 1H), 1.91-1.87

(m, 1H), 1.85-1.69 (m, 3H), 1.65-1.56 (m, 1H), 1.50-1.44 (m, 1H), 1.32-1.23 (m, 1H). <sup>13</sup>C NMR (150 MHz, CDCl<sub>3</sub>) δ 211.43, 144.77, 136.93, 129.93, 127.90, 57.60, 45.38, 42.99, 31.69, 28.84, 28.43, 23.24, 21.65. **HRMS** (ESI) *m/z* calculated for C<sub>15</sub>H<sub>20</sub>NaO<sub>3</sub>S [M+Na]<sup>+</sup> 303.1025, found 303.1042.

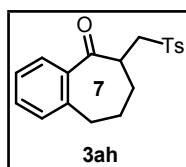**6-(Tosylmethyl)-6,7,8,9-tetrahydro-5H-benzo[7]annulen-5-one (3ah):** White

solid; m.p: 84-85 °C; <sup>1</sup>H NMR (600 MHz, CDCl<sub>3</sub>) δ 7.74 (d, *J* = 8.2 Hz, 2H), 7.44 (dd, *J* = 7.6, 1.0 Hz, 1H), 7.39 (td, *J* = 7.6, 1.2 Hz, 1H), 7.31 (d, *J* = 8.0 Hz, 2H), 7.26-7.21 (m, 2H), 4.06 (dd, *J* = 14.4, 6.6 Hz, 1H), 3.59-3.54 (m, 1H), 3.13 (dd, *J* = 14.2, 5.0 Hz, 1H), 3.09-3.06 (m, 1H), 3.01-2.91 (m, 1H), 2.45 (s, 3H),

2.26-2.12 (m, 2H), 1.73-1.57 (m, 2H). <sup>13</sup>C NMR (150 MHz, CDCl<sub>3</sub>) δ 202.33, 144.73, 142.42, 138.43, 136.62, 131.86, 130.11, 129.95, 128.91, 128.09, 126.32, 57.00, 44.03, 33.32, 30.57, 25.35, 21.66. **HRMS** (ESI) *m/z* calculated for C<sub>19</sub>H<sub>20</sub>NaO<sub>3</sub>S [M+Na]<sup>+</sup> 351.1025, found 351.1033.

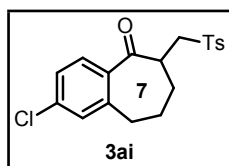

**2-Chloro-6-(tosylmethyl)-6,7,8,9-tetrahydro-5H-benzo[7]annulen-5-one**

**(3ai):** White solid; m.p: 55-56 °C; <sup>1</sup>H NMR (600 MHz, CDCl<sub>3</sub>) δ 7.74 (d, *J* = 8.2 Hz, 2H), 7.42 (d, *J* = 8.2 Hz, 1H), 7.32 (d, *J* = 8.2 Hz, 2H), 7.24-7.22 (m, 2H), 4.04 (dd, *J* = 14.2, 6.6 Hz, 1H), 3.56-3.51 (m, 1H), 3.12 (dd, *J* = 14.4, 5.0 Hz, 1H), 3.10-3.04 (m, 1H), 2.98-2.89 (m, 1H), 2.45 (s, 3H), 2.26-

2.13 (m, 2H), 1.72-1.57 (m, 2H). <sup>13</sup>C NMR (150 MHz, CDCl<sub>3</sub>) δ 201.10, 144.81, 144.21, 137.99, 136.77, 136.60, 130.57, 130.04, 129.97, 128.06, 126.66, 56.90, 43.96, 33.08, 30.24, 25.12, 21.66.

**HRMS** (ESI) *m/z* calculated for C<sub>19</sub>H<sub>19</sub>ClNaO<sub>3</sub>S [M+Na]<sup>+</sup> 385.0636, found 385.0645.

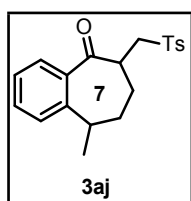

**9-Methyl-6-(tosylmethyl)-6,7,8,9-tetrahydro-5H-benzo[7]annulen-5-one**

**(3aj):** Yellow oil; <sup>1</sup>H NMR (600 MHz, CDCl<sub>3</sub>) δ 7.79 (d, *J* = 8.2 Hz, 2H), 7.44 (td, *J* = 7.8, 1.2 Hz, 1H), 7.38-7.33 (m, 3H), 7.29 (d, *J* = 7.8 Hz, 1H), 7.26 (t, *J* = 7.8 Hz, 1H), 4.02 (dd, *J* = 14.4, 4.8 Hz, 1H), 3.33-3.29 (m, 1H), 3.16-3.07 (m, 2H), 2.46 (s, 3H), 2.29-2.25 (m, 1H), 2.14-2.09 (m, 1H), 1.79-1.69 (m, 1H), 1.69-1.62 (m, 1H), 1.34 (d, *J* = 7.0 Hz, 3H). <sup>13</sup>C NMR (150 MHz, CDCl<sub>3</sub>) δ

205.29, 144.75, 143.73, 139.11, 136.91, 131.98, 129.97, 128.67, 128.01, 126.51, 126.30, 57.51, 45.39, 35.69, 34.38, 27.77, 21.66, 20.32. **HRMS** (ESI) *m/z* calculated for C<sub>20</sub>H<sub>22</sub>NaO<sub>3</sub>S [M+Na]<sup>+</sup> 365.1182, found 365.1189.

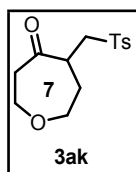

**5-(Tosylmethyl)oxepan-4-one (3ak):** White solid; m.p: 84-85 °C; <sup>1</sup>H NMR (600 MHz, CDCl<sub>3</sub>) δ 7.78 (d, *J* = 8.2 Hz, 2H), 7.37 (d, *J* = 8.2 Hz, 2H), 4.11-4.02 (m, 2H), 3.86-3.75 (m, 2H), 3.75-3.67 (m, 1H), 3.56-3.48 (m, 1H), 2.99 (dd, *J* = 14.4, 6.6 Hz, 1H), 2.87-2.76 (m, 1H), 2.64 (dt, *J* = 16.8, 3.6 Hz, 1H), 2.46 (s, 3H), 2.15-2.08 (m, 1H), 1.78-1.71 (m, 1H). <sup>13</sup>C NMR (150 MHz, CDCl<sub>3</sub>) δ 208.11, 145.01, 136.82,

130.03, 127.86, 65.92, 56.71, 45.20, 45.12, 39.80, 33.30, 21.67. **HRMS** (ESI) *m/z* calculated for C<sub>14</sub>H<sub>18</sub>NaO<sub>4</sub>S [M+Na]<sup>+</sup> 305.0818, found 305.0837.

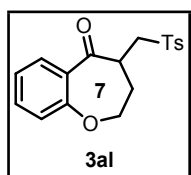

**4-(Tosylmethyl)-3,4-dihydrobenzo[b]oxepin-5(2H)-one (3al):** Yellow solid; m.p: 70-71 °C; <sup>1</sup>H NMR (600 MHz, CDCl<sub>3</sub>) δ 7.73 (d, *J* = 8.2 Hz, 2H), 7.48 (dd, *J* = 7.8, 1.8 Hz, 1H), 7.42 (td, *J* = 7.8, 1.8 Hz, 1H), 7.30 (d, *J* = 8.2 Hz, 2H), 7.07-7.03 (m, 2H), 4.57-4.53 (m, 1H), 3.98 (dd, *J* = 14.4, 6.0 Hz, 1H), 3.83 (td, *J* = 12.6, 5.2 Hz, 1H), 3.76-3.71 (m, 1H), 3.18 (dd, *J* = 14.4, 6.0 Hz, 1H), 2.85-

2.77 (m, 1H), 2.44 (s, 3H), 1.89-1.77 (m, 1H). <sup>13</sup>C NMR (150 MHz, CDCl<sub>3</sub>) δ 198.29, 162.37, 144.84, 136.39, 133.93, 129.98, 129.61, 128.09, 127.72, 122.44, 120.30, 72.01, 56.07, 43.81, 34.56, 21.65. **HRMS** (ESI) *m/z* calculated for C<sub>18</sub>H<sub>18</sub>NaO<sub>4</sub>S [M+Na]<sup>+</sup> 353.0818, found 353.0833.

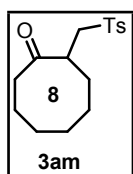

**2-(Tosylmethyl)cyclooctanone (3am):** Yellow oil; <sup>1</sup>H NMR (600 MHz, CDCl<sub>3</sub>) δ 7.76 (d, *J* = 8.2 Hz, 2H), 7.35 (d, *J* = 8.2 Hz, 2H), 3.82 (dd, *J* = 14.0, 8.4 Hz, 1H), 3.48-3.43 (m, 1H), 2.98 (dd, *J* = 14.0, 3.6 Hz, 1H), 2.69-2.66 (m, 1H), 2.45 (s, 3H), 2.34-2.26 (m, 1H), 2.16-2.07 (m, 1H), 1.95-1.90 (m, 1H), 1.84-1.75 (m, 1H), 1.70-

1.61 (m, 3H), 1.57-1.53 (m, 2H), 1.50-1.41 (m, 1H), 1.06-0.99 (m, 1H).  $^{13}\text{C}$  NMR (150 MHz,  $\text{CDCl}_3$ )  $\delta$  215.79, 144.82, 136.73, 129.94, 127.87, 58.29, 43.09, 42.53, 34.15, 28.18, 24.44, 24.42, 23.55, 21.66. **HRMS** (ESI)  $m/z$  calculated for  $\text{C}_{16}\text{H}_{22}\text{NaO}_3\text{S}$   $[\text{M}+\text{Na}]^+$  317.1182, found 317.1186.

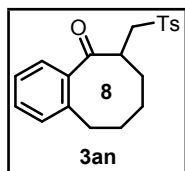

**6-(Tosylmethyl)-7,8,9,10-tetrahydrobenzo[8]annulen-5(6H)-one (3an):**

White solid; m.p: 82-83 °C;  $^1\text{H}$  NMR (600 MHz,  $\text{CDCl}_3$ )  $\delta$  7.72 (d,  $J = 8.2$  Hz, 2H), 7.56 (d,  $J = 7.8$  Hz, 1H), 7.41 (td,  $J = 7.8, 1.2$  Hz, 1H), 7.28-7.23 (m, 3H), 7.19 (d,  $J = 7.8$  Hz, 3H), 4.07 (dd,  $J = 14.0, 7.4$  Hz, 1H), 4.04-3.98 (m, 1H), 3.45-3.32 (m, 1H), 3.09 (dd,  $J = 14.0, 4.0$  Hz, 1H), 2.87 (dt,  $J = 15.0, 5.2$  Hz, 1H), 2.41 (s, 3H), 2.05-1.98 (m, 1H), 1.87-1.79 (m, 2H), 1.74-1.65 (m, 2H), 1.56-1.48 (m, 1H), 1.41-1.31 (m, 1H).  $^{13}\text{C}$  NMR (150 MHz,  $\text{CDCl}_3$ )  $\delta$  204.08, 144.72, 139.40, 139.11, 136.44, 132.32, 131.62, 129.89, 128.21, 128.11, 126.41, 57.99, 44.87, 34.50, 32.24, 27.71, 22.34, 21.62. **HRMS** (ESI)  $m/z$  calculated for  $\text{C}_{20}\text{H}_{22}\text{NaO}_3\text{S}$   $[\text{M}+\text{Na}]^+$  365.1182, found 365.1188.

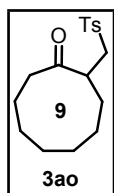

**2-(Tosylmethyl)cyclononanone (3ao):**

Yellow solid; m.p: 61-64 °C;  $^1\text{H}$  NMR (600 MHz,  $\text{CDCl}_3$ )  $\delta$  7.76 (d,  $J = 8.2$  Hz, 2H), 7.35 (d,  $J = 8.2$  Hz, 2H), 3.76 (dd,  $J = 14.0, 8.0$  Hz, 1H), 3.54-3.32 (m, 1H), 3.00 (dd,  $J = 14.2, 4.4$  Hz, 1H), 2.80-2.76 (m, 1H), 2.45 (s, 3H), 2.38-2.34 (m, 1H), 1.99-1.94 (m, 1H), 1.93-1.77 (m, 2H), 1.77-1.68 (m, 1H), 1.67-1.59 (m, 4H), 1.48-1.38 (m, 2H), 1.31-1.23 (m, 2H).  $^{13}\text{C}$  NMR (150 MHz,  $\text{CDCl}_3$ )  $\delta$  215.63, 144.81, 136.75, 129.94, 127.88, 58.26, 46.31, 43.12, 30.87, 26.68, 26.10, 24.26, 24.07, 23.57, 21.66. **HRMS** (ESI)  $m/z$  calculated for  $\text{C}_{17}\text{H}_{24}\text{NaO}_3\text{S}$   $[\text{M}+\text{Na}]^+$  331.1331, found 331.1344.

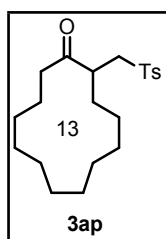

**2-(Tosylmethyl)cyclotridecanone (3ap):**

Yellow solid; m.p: 67-68 °C;  $^1\text{H}$  NMR (600 MHz,  $\text{CDCl}_3$ )  $\delta$  7.75 (d,  $J = 8.2$  Hz, 2H), 7.35 (d,  $J = 8.2$  Hz, 2H), 3.73 (dd,  $J = 14.0, 9.2$  Hz, 1H), 3.22-3.18 (m, 1H), 2.98 (dd,  $J = 14.0, 3.2$  Hz, 1H), 2.77-2.72 (m, 1H), 2.50-2.47 (m, 1H), 2.45 (s, 3H), 1.99-1.93 (m, 1H), 1.60-1.56 (m, 2H), 1.43-1.14 (m, 17H).  $^{13}\text{C}$  NMR (150 MHz,  $\text{CDCl}_3$ )  $\delta$  210.88, 144.81, 136.65, 129.93, 127.92, 57.59, 44.94, 41.72, 31.78, 26.68, 26.27, 25.97, 24.67, 24.55, 23.81, 23.75, 23.28, 21.70, 21.64. **HRMS** (ESI)  $m/z$  calculated for  $\text{C}_{21}\text{H}_{32}\text{NaO}_3\text{S}$   $[\text{M}+\text{Na}]^+$  387.1964, found 387.1971.

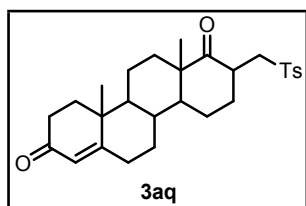

**10a,12a-Dimethyl-2-(tosylmethyl)-**

**2,3,4,4a,5,6,10,10a,10b,11,12,12a-dodecahydrochrysen-**

**1,8(4bH,9H)-dione (3aq):**

White solid; m.p: 142-143 °C;  $^1\text{H}$  NMR (600 MHz,  $\text{CDCl}_3$ )  $\delta$  7.78 (d,  $J = 8.0$  Hz, 2H), 7.35 (d,  $J = 8.0$  Hz, 2H), 5.72 (s, 1H), 3.84 (dd,  $J = 14.4, 4.0$  Hz, 1H), 3.52-3.38 (m, 1H), 2.78 (dd,  $J = 14.4, 7.0$  Hz, 1H), 2.65-2.54 (m, 1H), 2.45 (s, 3H), 2.41-2.23 (m, 4H), 2.12-1.99 (m, 2H), 1.96-1.82 (m, 1H), 1.73-1.63 (m, 4H), 1.61-1.47 (m, 2H), 1.41-1.32 (m, 2H), 1.18 (s, 3H), 1.15 (s, 3H), 1.01-0.92 (m, 2H), 0.89-0.84 (m, 1H).  $^{13}\text{C}$  NMR (150



MHz, CDCl<sub>3</sub>)  $\delta$  212.13, 199.27, 170.15, 144.74, 137.07, 129.90, 127.82, 123.71, 55.90, 52.77, 51.80, 48.33, 39.89, 38.61, 35.41, 35.23, 34.00, 33.88, 32.56, 32.34, 31.17, 23.31, 21.66, 19.75, 17.51, 16.56. **HRMS** (ESI)  $m/z$  calculated for C<sub>28</sub>H<sub>36</sub>NaO<sub>4</sub>S [M+Na]<sup>+</sup> 491.2227, found 491.2227.

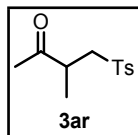

**3-Methyl-4-tosylbutan-2-one (3ar):** Yellow oil; <sup>1</sup>H NMR (600 MHz, CDCl<sub>3</sub>)  $\delta$  7.77 (d,  $J$  = 8.0 Hz, 2H), 7.36 (d,  $J$  = 8.0 Hz, 2H), 3.73 (dd,  $J$  = 14.2, 7.0 Hz, 1H), 3.24-3.20 (m, 1H), 2.96 (dd,  $J$  = 14.2, 5.2 Hz, 1H), 2.45 (s, 3H), 2.21 (s, 3H), 1.27 (d,  $J$  = 7.2 Hz, 3H). <sup>13</sup>C NMR (150 MHz, CDCl<sub>3</sub>)  $\delta$  208.20, 144.90, 136.68, 129.98, 127.92, 58.06, 40.97, 28.30, 21.65, 17.30. **HRMS** (ESI)  $m/z$  calculated for C<sub>12</sub>H<sub>16</sub>NaO<sub>3</sub>S [M+Na]<sup>+</sup> 263.0712, found 263.0719.

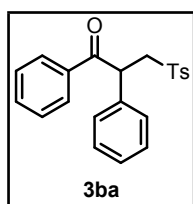

**1,2-Diphenyl-3-tosylpropan-1-one (3ba):** White solid; m.p: 90-91 °C; <sup>1</sup>H NMR (600 MHz, CDCl<sub>3</sub>)  $\delta$  7.89 (d,  $J$  = 7.8 Hz, 2H), 7.70 (d,  $J$  = 7.8 Hz, 2H), 7.50 (t,  $J$  = 7.2 Hz, 1H), 7.38 (t,  $J$  = 7.8 Hz, 2H), 7.25-7.21 (m, 6H), 7.20-7.18 (m, 1H), 5.28 (dd,  $J$  = 8.8, 3.6 Hz, 1H), 4.42 (dd,  $J$  = 14.2, 8.8 Hz, 1H), 3.42 (dd,  $J$  = 14.2, 3.6 Hz, 1H), 2.39 (s, 3H). <sup>13</sup>C NMR (150 MHz, CDCl<sub>3</sub>)  $\delta$  195.88, 144.70, 136.54, 136.44, 135.53, 133.41, 129.81, 129.38, 128.88, 128.58, 128.15, 128.11, 127.96, 59.34, 47.56, 21.61. **HRMS** (ESI)  $m/z$  calculated for C<sub>22</sub>H<sub>20</sub>NaO<sub>3</sub>S [M+Na]<sup>+</sup> 387.1025, found 387.1026.

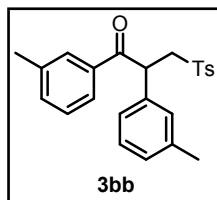

**1,2-Di-*m*-tolyl-3-tosylpropan-1-one (3bb):** White solid; m.p: 99-100 °C; <sup>1</sup>H NMR (600 MHz, CDCl<sub>3</sub>)  $\delta$  7.66-7.57 (m, 4H), 7.24 (d,  $J$  = 7.6 Hz, 1H), 7.21-7.18 (m, 1H), 7.15 (d,  $J$  = 7.8 Hz, 2H), 7.05 (t,  $J$  = 7.6 Hz, 1H), 6.96 (d,  $J$  = 7.8 Hz, 1H), 6.92 (d,  $J$  = 11.2 Hz, 2H), 5.16 (dd,  $J$  = 8.8, 3.6 Hz, 1H), 4.32 (dd,  $J$  = 14.2, 8.8 Hz, 1H), 3.33 (dd,  $J$  = 14.2, 3.6 Hz, 1H), 2.32 (s, 3H), 2.28 (s, 3H), 2.16 (s, 3H). <sup>13</sup>C NMR (150 MHz, CDCl<sub>3</sub>)  $\delta$  196.12, 144.61, 139.11, 138.39, 136.48, 136.43, 135.58, 134.21, 129.75, 129.41, 129.21, 128.69, 128.63, 128.43, 128.10, 126.14, 125.30, 59.39, 47.46, 21.61, 21.37, 21.34. **HRMS** (ESI)  $m/z$  calculated for C<sub>24</sub>H<sub>24</sub>NaO<sub>3</sub>S [M+Na]<sup>+</sup> 415.1338, found 415.1337.

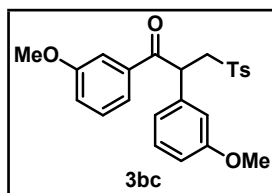

**1,2-Bis(3-methoxyphenyl)-3-tosylpropan-1-one (3bc):** Yellow oil; <sup>1</sup>H NMR (600 MHz, CDCl<sub>3</sub>)  $\delta$  7.70 (d,  $J$  = 8.0 Hz, 2H), 7.51 (d,  $J$  = 7.8 Hz, 1H), 7.39 (t,  $J$  = 1.2 Hz, 1H), 7.29 (t,  $J$  = 8.0 Hz, 1H), 7.24 (d,  $J$  = 8.0 Hz, 2H), 7.18-7.15 (m, 1H), 7.05 (dd,  $J$  = 8.0, 2.4 Hz, 1H), 6.82 (d,  $J$  = 7.8 Hz, 1H), 6.73-6.72 (m, 2H), 5.20 (dd,  $J$  = 9.0, 3.5 Hz, 1H), 4.40 (dd,  $J$  = 14.2, 9.0 Hz, 1H), 3.79 (s, 3H), 3.72 (s, 3H), 3.41 (dd,  $J$  = 14.2, 3.6 Hz, 1H), 2.39 (s, 3H). <sup>13</sup>C NMR (150 MHz, CDCl<sub>3</sub>)  $\delta$  195.51, 160.17, 159.75, 144.70, 137.94, 136.84, 136.41, 130.41, 129.80, 129.56, 128.12, 121.49, 120.44, 120.02, 113.64, 113.37, 113.12, 59.24, 55.40, 55.24, 47.72, 21.61. **HRMS** (ESI)  $m/z$  calculated for C<sub>24</sub>H<sub>24</sub>NaO<sub>5</sub>S [M+Na]<sup>+</sup> 447.1237, found 447.1236.

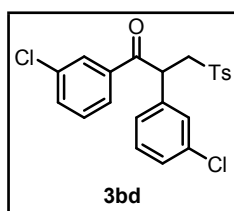

**1,2-Bis(3-chlorophenyl)-3-tosylpropan-1-one (3bd):** Yellow solid; m.p: 74-75 °C;  $^1\text{H}$  NMR (600 MHz,  $\text{CDCl}_3$ )  $\delta$  7.83 (t,  $J = 1.8$  Hz, 1H), 7.80-7.75 (m, 1H), 7.68 (d,  $J = 8.4$  Hz, 2H), 7.51-7.49 (m, 1H), 7.36 (t,  $J = 7.8$  Hz, 1H), 7.28-7.23 (m, 2H), 7.21-7.16 (m, 3H), 7.14 (dt,  $J = 6.6, 1.8$  Hz, 1H), 5.19 (dd,  $J = 8.6, 4.0$  Hz, 1H), 4.33 (dd,  $J = 14.2, 8.6$  Hz, 1H), 3.43 (dd,  $J = 14.2, 4.0$  Hz, 1H), 2.41 (s, 3H).  $^{13}\text{C}$  NMR (150 MHz,  $\text{CDCl}_3$ )  $\delta$  194.43, 145.07, 137.70, 136.81, 136.11, 135.28, 135.17, 133.63, 130.73, 130.06, 129.92, 128.88, 128.49, 128.18, 128.06, 126.90, 126.44, 59.08, 47.22, 21.64. **HRMS** (ESI)  $m/z$  calculated for  $\text{C}_{22}\text{H}_{18}\text{Cl}_2\text{NaO}_3\text{S}$  [ $\text{M}+\text{Na}$ ] $^+$  455.0246, found 455.0254.

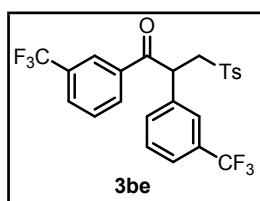

**3-Tosyl-1,2-bis(3-(trifluoromethyl)phenyl)propan-1-one (3be):** Yellow solid; m.p: 76-77 °C;  $^1\text{H}$  NMR (600 MHz,  $\text{CDCl}_3$ )  $\delta$  8.14 (s, 1H), 8.11 (d,  $J = 7.8$  Hz, 1H), 7.80 (d,  $J = 7.8$  Hz, 1H), 7.68 (d,  $J = 8.2$  Hz, 2H), 7.58 (t,  $J = 7.8$  Hz, 1H), 7.51-7.45 (m, 3H), 7.41 (t,  $J = 8.0$  Hz, 1H), 7.25 (d,  $J = 8.2$  Hz, 2H), 5.36 (dd,  $J = 8.5, 4.2$  Hz, 1H), 4.37 (dd,  $J = 14.2, 8.5$  Hz, 1H), 3.49 (dd,  $J = 14.2, 4.2$  Hz, 1H), 2.40 (s, 3H).  $^{13}\text{C}$  NMR (150 MHz,  $\text{CDCl}_3$ )  $\delta$  194.41, 145.20, 136.63, 136.03, 135.65, 131.93 (q,  $J = 32.5$  Hz), 131.87, 131.67, 130.17 (q,  $J = 3.0$  Hz), 130.11, 129.96, 129.54, 128.02, 125.72 (q,  $J = 3.0$  Hz), 125.27 (q,  $J = 3.0$  Hz), 124.89 (q,  $J = 3.0$  Hz), 123.51 (q,  $J = 273.0$  Hz), 123.44 (q,  $J = 273.0$  Hz), 59.08, 47.34, 21.56. **HRMS** (ESI)  $m/z$  calculated for  $\text{C}_{24}\text{H}_{18}\text{F}_6\text{NaO}_3\text{S}$  [ $\text{M}+\text{Na}$ ] $^+$  523.0773, found 523.0776.

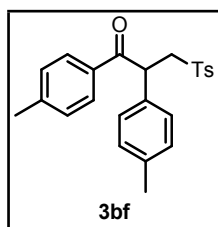

**1,2-Di-*p*-tolyl-3-tosylpropan-1-one (3bf):** Yellow solid; m.p: 85-86 °C;  $^1\text{H}$  NMR (600 MHz,  $\text{CDCl}_3$ )  $\delta$  7.79 (d,  $J = 8.2$  Hz, 2H), 7.68 (d,  $J = 8.2$  Hz, 2H), 7.22 (d,  $J = 8.0$  Hz, 2H), 7.16 (d,  $J = 8.0$  Hz, 2H), 7.10 (d,  $J = 8.0$  Hz, 2H), 7.03 (d,  $J = 8.0$  Hz, 2H), 5.21 (dd,  $J = 8.6, 4.0$  Hz, 1H), 4.37 (dd,  $J = 14.2, 8.6$  Hz, 1H), 3.40 (dd,  $J = 14.2, 4.0$  Hz, 1H), 2.38 (s, 3H), 2.34 (s, 3H), 2.23 (s, 3H).  $^{13}\text{C}$  NMR (150 MHz,  $\text{CDCl}_3$ )  $\delta$  195.52, 144.57, 144.26, 137.68, 136.57, 133.74, 133.01, 129.99, 129.74, 129.26, 129.02, 128.09, 127.99, 59.32, 47.07, 21.64, 21.60, 21.00. **HRMS** (ESI)  $m/z$  calculated for  $\text{C}_{24}\text{H}_{24}\text{NaO}_3\text{S}$  [ $\text{M}+\text{Na}$ ] $^+$  415.1338, found 415.1345.

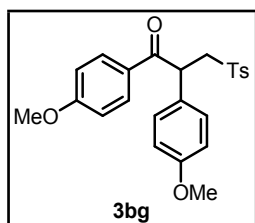

**1,2-Bis(4-methoxyphenyl)-3-tosylpropan-1-one (3bg):** Yellow solid; m.p: 88-89 °C;  $^1\text{H}$  NMR (600 MHz,  $\text{CDCl}_3$ )  $\delta$  7.88 (d,  $J = 8.8$  Hz, 2H), 7.68 (d,  $J = 8.2$  Hz, 2H), 7.22 (d,  $J = 8.2$  Hz, 2H), 7.14 (d,  $J = 8.8$  Hz, 2H), 6.85 (d,  $J = 8.8$  Hz, 2H), 6.75 (d,  $J = 8.8$  Hz, 2H), 5.18 (dd,  $J = 8.4, 4.0$  Hz, 1H), 4.34 (dd,  $J = 14.2, 8.8$  Hz, 1H), 3.82 (s, 3H), 3.71 (s, 3H), 3.40 (dd,  $J = 14.2, 4.0$  Hz, 1H), 2.39 (s, 3H).  $^{13}\text{C}$  NMR (150 MHz,  $\text{CDCl}_3$ )  $\delta$  194.45, 163.69, 159.16, 144.53, 136.60, 131.21, 129.71, 129.20, 128.87, 128.45, 128.08, 114.69, 113.78, 59.38, 55.48, 55.23, 46.39, 21.59. **HRMS** (ESI)  $m/z$  calculated for  $\text{C}_{24}\text{H}_{24}\text{NaO}_5\text{S}$  [ $\text{M}+\text{Na}$ ] $^+$  447.1237, found 447.1250.

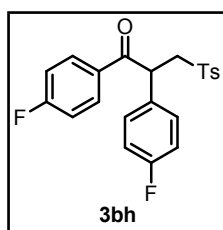

**1,2-Bis(4-fluorophenyl)-3-tosylpropan-1-one (3bh):** Yellow solid; m.p.: 97-98 °C;  $^1\text{H NMR}$  (600 MHz,  $\text{CDCl}_3$ )  $\delta$  7.93 (dd,  $J = 8.8, 5.4$  Hz, 2H), 7.69 (d,  $J = 8.2$  Hz, 2H), 7.25 (d,  $J = 8.2$  Hz, 2H), 7.21 (dd,  $J = 8.8, 5.4$  Hz, 2H), 7.07 (t,  $J = 8.4$  Hz, 2H), 6.94 (t,  $J = 8.4$  Hz, 2H), 5.25 (dd,  $J = 8.5, 4.0$  Hz, 1H), 4.34 (dd,  $J = 14.2, 8.5$  Hz, 1H), 3.42 (dd,  $J = 14.2, 4.0$  Hz, 1H), 2.40 (s, 3H).  $^{13}\text{C NMR}$  (150 MHz,  $\text{CDCl}_3$ )  $\delta$  194.41, 165.92 (d,  $J = 254.6$  Hz), 162.37 (d,  $J = 246.5$  Hz), 144.90, 136.39, 132.05 (d,  $J = 3.3$  Hz), 131.72 (d,  $J = 2.8$  Hz), 131.57 (d,  $J = 9.5$  Hz), 129.87, 129.84 (d,  $J = 9.5$  Hz), 128.03, 116.41 (d,  $J = 21.6$  Hz), 115.89 (d,  $J = 21.8$  Hz), 59.26, 46.60, 21.60. **HRMS** (ESI)  $m/z$  calculated for  $\text{C}_{22}\text{H}_{18}\text{F}_2\text{NaO}_3\text{S}$   $[\text{M}+\text{Na}]^+$  423.0837, found 423.0839.

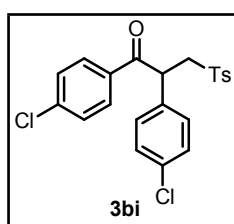

**1,2-Bis(4-chlorophenyl)-3-tosylpropan-1-one (3bi):** White solid; m.p.: 89-90 °C;  $^1\text{H NMR}$  (600 MHz,  $\text{CDCl}_3$ )  $\delta$  7.83 (d,  $J = 8.4$  Hz, 2H), 7.68 (d,  $J = 8.4$  Hz, 2H), 7.38 (d,  $J = 8.4$  Hz, 2H), 7.26 (d,  $J = 7.8$  Hz, 2H), 7.22 (d,  $J = 8.4$  Hz, 2H), 7.15 (d,  $J = 8.4$  Hz, 2H), 5.21 (dd,  $J = 8.4, 4.2$  Hz, 1H), 4.30 (dd,  $J = 14.2, 8.4$  Hz, 1H), 3.42 (dd,  $J = 14.2, 4.2$  Hz, 1H), 2.41 (s, 3H).  $^{13}\text{C NMR}$  (150 MHz,  $\text{CDCl}_3$ )  $\delta$  194.61, 144.96, 140.24, 136.33, 134.54, 134.30, 133.57, 130.23, 129.89, 129.64, 129.50, 129.08, 128.00, 59.04, 46.86, 21.63. **HRMS** (ESI)  $m/z$  calculated for  $\text{C}_{22}\text{H}_{18}\text{Cl}_2\text{NaO}_3\text{S}$   $[\text{M}+\text{Na}]^+$  455.0246, found 455.0243.

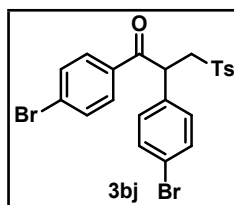

**1,2-Bis(4-bromophenyl)-3-tosylpropan-1-one (3bj):** White solid; m.p.: 101-103 °C;  $^1\text{H NMR}$  (600 MHz,  $\text{CDCl}_3$ )  $\delta$  7.67 (d,  $J = 8.4$  Hz, 2H), 7.59 (d,  $J = 8.4$  Hz, 2H), 7.47 (d,  $J = 8.4$  Hz, 2H), 7.29 (d,  $J = 8.4$  Hz, 2H), 7.18 (d,  $J = 8.4$  Hz, 2H), 7.01 (d,  $J = 8.4$  Hz, 2H), 5.12 (dd,  $J = 8.4, 4.2$  Hz, 1H), 4.21 (dd,  $J = 14.4, 8.4$  Hz, 1H), 3.35 (dd,  $J = 14.4, 4.2$  Hz, 1H), 2.34 (s, 3H).  $^{13}\text{C NMR}$  (150 MHz,  $\text{CDCl}_3$ )  $\delta$  194.75, 144.99, 136.28, 134.99, 133.93, 132.60, 132.10, 130.31, 129.90, 129.83, 129.05, 128.00, 122.43, 58.93, 46.92, 21.66. **HRMS** (ESI)  $m/z$  calculated for  $\text{C}_{22}\text{H}_{18}\text{Br}_2\text{NaO}_3\text{S}$   $[\text{M}+\text{Na}]^+$  544.9213, found 544.9221.

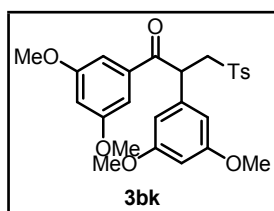

**1,2-Bis(3,5-dimethoxyphenyl)-3-tosylpropan-1-one (3bk):** Yellow oil;  $^1\text{H NMR}$  (600 MHz,  $\text{CDCl}_3$ )  $\delta$  7.70 (d,  $J = 8.0$  Hz, 2H), 7.34-7.14 (m, 2H), 7.03 (d, 2H), 6.59 (t,  $J = 1.8$  Hz, 1H), 6.33 (d,  $J = 1.8$  Hz, 2H), 6.27 (t,  $J = 1.8$  Hz, 1H), 5.08 (dd,  $J = 8.8, 3.6$  Hz, 1H), 4.37 (dd,  $J = 14.2, 8.8$  Hz, 1H), 3.78 (s, 6H), 3.70 (s, 6H), 3.39 (dd,  $J = 14.2, 3.6$  Hz, 1H), 2.40 (s, 3H).  $^{13}\text{C NMR}$  (150 MHz,  $\text{CDCl}_3$ )  $\delta$  195.21, 161.38, 160.76, 144.68, 138.62, 137.38, 136.43, 129.78, 128.12, 106.73, 106.08, 105.82, 99.79, 59.17, 55.55, 55.36, 48.00, 21.60. **HRMS** (ESI)  $m/z$  calculated for  $\text{C}_{26}\text{H}_{28}\text{NaO}_7\text{S}$   $[\text{M}+\text{Na}]^+$  507.1448, found 507.1449.

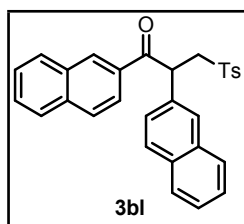

**1,2-Di(naphthalen-2-yl)-3-tosylpropan-1-one (3bl):** Yellow oil;  $^1\text{H}$  NMR (600 MHz,  $\text{CDCl}_3$ )  $\delta$  8.50 (s, 1H), 7.94 (d,  $J = 8.8$  Hz, 1H), 7.90 (d,  $J = 8.2$  Hz, 1H), 7.78 (d,  $J = 8.8$  Hz, 2H), 7.74-7.66 (m, 6H), 7.54 (t,  $J = 7.2$  Hz, 1H), 7.51-7.47 (m, 1H), 7.43-7.39 (m, 3H), 7.11 (d,  $J = 8.2$  Hz, 2H), 5.61 (dd,  $J = 8.2, 4.2$  Hz, 1H), 4.51 (dd,  $J = 14.4, 8.2$  Hz, 1H), 3.62 (dd,  $J = 14.4, 4.2$  Hz, 1H), 2.27 (s, 3H).  $^{13}\text{C}$  NMR (150 MHz,  $\text{CDCl}_3$ )  $\delta$  195.85, 144.68, 136.43, 135.66, 133.83, 133.49, 132.85, 132.71, 132.35, 130.89, 129.75, 129.72, 129.41, 128.80, 128.51, 128.06, 127.83, 127.70, 127.62, 127.56, 126.86, 126.55, 126.46, 125.57, 124.33, 59.33, 47.90, 21.51. **HRMS** (ESI)  $m/z$  calculated for  $\text{C}_{30}\text{H}_{24}\text{NaO}_3\text{S}$   $[\text{M}+\text{Na}]^+$  487.1338, found 487.1347.

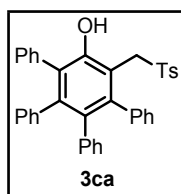

**5',6'-Diphenyl-4'-(tosylmethyl)-[1,1':2',1''-terphenyl]-3'-ol (3ca):** Yellow solid; m.p: 189-190 °C;  $^1\text{H}$  NMR (600 MHz,  $\text{CDCl}_3$ )  $\delta$  7.56 (d,  $J = 8.2$  Hz, 2H), 7.28-7.25 (m, 3H), 7.22 (t,  $J = 7.4$  Hz, 2H), 7.19-7.13 (m, 3H), 7.11-7.07 (m, 3H), 6.98-6.97 (m, 2H), 6.88-6.82 (m, 3H), 6.81-6.74 (m, 5H), 6.70 (d,  $J = 7.4$  Hz, 2H), 4.49 (s, 2H), 2.43 (s, 3H).  $^{13}\text{C}$  NMR (150 MHz,  $\text{CDCl}_3$ )  $\delta$  151.94, 144.79, 143.99, 142.89, 139.96, 139.52, 138.77, 136.54, 136.14, 134.93, 131.46, 130.96, 130.94, 130.70, 129.72, 129.63, 128.31, 128.05, 127.35, 127.04, 126.72, 126.63, 126.56, 125.64, 125.24, 113.80, 57.06, 21.67. **HRMS** (ESI)  $m/z$  calculated for  $\text{C}_{38}\text{H}_{30}\text{NaO}_3\text{S}$   $[\text{M}+\text{Na}]^+$  589.1808, found 589.2803.

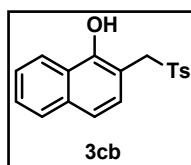

**2-(Tosylmethyl)naphthalen-1-ol (3cb):** Brown solid; m.p: 158-161 °C;  $^1\text{H}$  NMR (600 MHz,  $\text{CDCl}_3$ )  $\delta$  8.38 (d,  $J = 7.2$  Hz, 1H), 7.92 (s, 1H), 7.74 (d,  $J = 7.2$  Hz, 1H), 7.60 (d,  $J = 8.4$  Hz, 2H), 7.54-7.51 (m, 2H), 7.26-7.24 (m, 3H), 6.68 (d,  $J = 8.4$  Hz, 1H), 4.57 (s, 2H), 2.43 (s, 3H).  $^{13}\text{C}$  NMR (150 MHz,  $\text{CDCl}_3$ )  $\delta$  152.51, 145.43, 134.92, 133.95, 129.84, 128.57, 128.54, 127.37, 127.22, 126.47, 125.86, 122.87, 121.16, 109.51, 60.17, 21.70. **HRMS** (ESI)  $m/z$  calculated for  $\text{C}_{18}\text{H}_{16}\text{NaO}_3\text{S}$   $[\text{M}+\text{Na}]^+$  335.0711, found 335.0718.

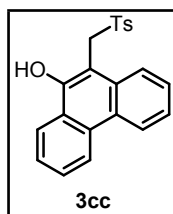

**10-(Tosylmethyl)phenanthren-9-ol (3cc):** White solid; m.p: 171-172 °C;  $^1\text{H}$  NMR (600 MHz,  $\text{CDCl}_3$ )  $\delta$  8.63 (d,  $J = 8.2$  Hz, 1H), 8.58 (d,  $J = 8.2$  Hz, 1H), 8.54 (d,  $J = 8.0$  Hz, 1H), 8.28 (s, 1H), 7.76-7.66 (m, 4H), 7.44-7.41 (m, 1H), 7.34-7.30 (m, 2H), 7.18 (d,  $J = 8.0$  Hz, 2H), 4.94 (s, 2H), 2.34 (s, 3H).  $^{13}\text{C}$  NMR (150 MHz,  $\text{CDCl}_3$ )  $\delta$  151.87, 145.55, 134.44, 131.72, 131.09, 129.87, 128.60, 128.19, 127.02, 127.00, 126.88, 126.66, 124.36, 123.70, 122.98, 122.41, 122.17, 105.03, 55.16, 21.61. **HRMS** (ESI)  $m/z$  calculated for  $\text{C}_{22}\text{H}_{18}\text{NaO}_3\text{S}$   $[\text{M}+\text{Na}]^+$  385.0869, found 385.0870.

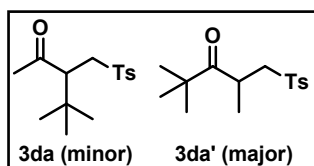

**4,4-Dimethyl-3-(tosylmethyl)pentan-2-one (3da, minor): 2,4,4-trimethyl-1-tosylpentan-3-one (3da', major) = 1:3.**  $^1\text{H}$  NMR (600 MHz,  $\text{CDCl}_3$ )  $\delta$  7.78-7.75 (m, 2.67H, major (2H)+ minor (0.67H)), 7.37-7.34 (m, 2.67H, major (2H) + minor (0.67H)), 3.72 (dd,  $J = 12.4, 6.6$  Hz, 1H, major), 3.69 (dd,  $J = 12.4, 6.6$  Hz, 0.33H, minor),

3.51 (dd,  $J = 13.8, 6.6$  Hz, 1H, major), 3.06 (dd,  $J = 13.8, 6.0$  Hz, 0.67H, minor), 3.02 (dd,  $J = 13.8, 6.0$  Hz, 1H), 2.46 (s, 1H, minor), 2.45 (s, 3H, major), 2.30 (s, 1H, minor), 1.21 (d,  $J = 7.2$  Hz, 3H, major), 1.19 (s, 9H, major), 0.92 (s, 3H, minor).  $^{13}\text{C}$  NMR (150 MHz,  $\text{CDCl}_3$ )  $\delta$  **3da**: 209.84, 144.93, 136.32, 129.98, 127.96, 56.31, 53.87, 33.97, 28.76, 27.53, 21.67; **3da'**: 216.14, 144.86, 136.89, 129.98, 127.82, 59.38, 44.91, 34.24, 26.63, 21.65, 19.05. **HRMS** (ESI)  $m/z$  calculated for  $\text{C}_{15}\text{H}_{22}\text{NaO}_3\text{S}$  [ $\text{M}+\text{Na}$ ] $^+$  305.1192, found 305.1187.

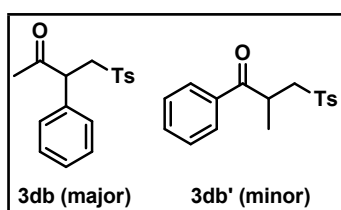

**3-Phenyl-4-tosylbutan-2-one (3db, major) : 2-methyl-1-phenyl-3-tosylpropan-1-one (3db', minor) = 2:1.**  $^1\text{H}$  NMR (600 MHz,  $\text{CDCl}_3$ )  $\delta$  7.89 (d,  $J = 7.8$  Hz, 1H, minor), 7.73 (d,  $J = 7.8$  Hz, 1H, minor), 7.71 (d,  $J = 7.8$  Hz, 2H, major), 7.58 (t,  $J = 7.2$  Hz, 0.5H, minor), 7.46 (t,  $J = 7.2$  Hz, 1H, major), 7.26-7.28 (m, 6H, major (4H)+minor (1H)), 7.12 (d,  $J = 7.2$  Hz, 2H, major), 4.34-4.36 (m,

1H, major), 4.20 (dd,  $J = 13.8, 7.8$  Hz, 1H, major), 4.18-4.12 (m, 0.5H, minor), 3.89 (dd,  $J = 14.0, 7.8$  Hz, 0.5H, minor), 3.29 (dd,  $J = 13.8, 4.2$  Hz, 1H, major), 3.16 (dd,  $J = 14.0, 5.0$  Hz, 0.5H, minor), 2.42 (s, 3H, major), 2.40 (s, 1.5H, minor), 2.10 (s, 3H, major), 1.34 (d,  $J = 7.2$  Hz, 1.5H, minor).  $^{13}\text{C}$  NMR (150 MHz,  $\text{CDCl}_3$ )  $\delta$  **3db**: 204.09, 144.75, 136.59, 135.88, 133.56, 129.85, 129.34, 128.19, 127.92, 57.94, 52.76, 28.77, 21.61; **3db'**: 200.12, 144.84, 136.47, 134.96, 129.91, 128.77, 128.50, 128.16, 128.04, 58.73, 35.65, 21.60, 18.73. **HRMS** (ESI)  $m/z$  calculated for  $\text{C}_{17}\text{H}_{18}\text{NaO}_3\text{S}$  [ $\text{M}+\text{Na}$ ] $^+$  325.0878, found 325.0874.

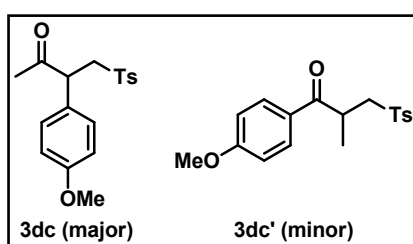

**3-(4-Methoxyphenyl)-4-tosylbutan-2-one (3dc major): 1-(4-methoxyphenyl)-2-methyl-3-tosylpropan-1-one (3dc' minor) = 3:1.**  $^1\text{H}$  NMR (600 MHz,  $\text{CDCl}_3$ )  $\delta$  7.81 (d,  $J = 8.4$  Hz, 0.67H, minor), 7.65 (d,  $J = 7.8$  Hz, 0.67H, minor), 7.61 (d,  $J = 7.8$  Hz, 2H, major), 7.24-7.18 (m, 2.67H, major (2H)+minor (0.67H)), 6.96 (d,  $J = 8.4$  Hz, 2H, major), 6.86 (d,  $J = 8.4$  Hz, 0.67H, minor), 6.72 (d,  $J = 8.4$  Hz, 2H,

major), 4.22 (dd,  $J = 7.8, 4.8$  Hz, 1H, major), 4.08 (dd,  $J = 14.4, 7.8$  Hz, 1H, major), 4.06-4.00 (m, 0.33H, minor), 3.81 (s, 1H, minor), 3.79 (dd,  $J = 14.4, 7.2$  Hz, 0.33H, minor), 3.69 (s, 3H, major), 3.20 (dd,  $J = 14.4, 4.8$  Hz, 1H, major), 3.06 (dd,  $J = 14.4, 5.4$  Hz, 0.33H, minor), 2.35 (s, 3H, major), 2.33 (s, 1H, minor), 2.02 (s, 3H, major), 1.25 (d,  $J = 7.2$  Hz, 1H, minor).  $^{13}\text{C}$  NMR (150 MHz,  $\text{CDCl}_3$ )  $\delta$  **3dc**: 204.34, 159.47, 144.66, 136.70, 130.86, 129.82, 129.31, 127.92, 114.71, 58.02, 55.30, 51.93, 28.65, 21.64; **3dc'**: 198.56, 163.89, 144.76, 136.54, 129.86, 128.05, 127.87, 127.70, 113.94, 58.83, 55.56, 35.24, 21.64, 18.94. **HRMS** (ESI)  $m/z$  calculated for  $\text{C}_{18}\text{H}_{20}\text{NaO}_4\text{S}$  [ $\text{M}+\text{Na}$ ] $^+$  355.0969, found 355.0980.

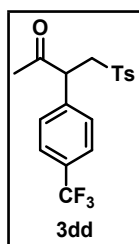

**4-Tosyl-3-(4-(trifluoromethyl)phenyl)butan-2-one (3dd):** Yellow oil.  $^1\text{H}$  NMR (600 MHz,  $\text{CDCl}_3$ )  $\delta$  7.64 (d,  $J = 8.4$  Hz, 2H), 7.52 (d,  $J = 8.4$  Hz, 2H), 7.26-7.25 (m, 4H), 4.43 (t,  $J = 7.2$  Hz, 1H), 4.12 (dd,  $J = 14.4, 7.2$  Hz, 1H), 3.35 (dd,  $J = 14.4, 6.0$  Hz, 1H), 2.41 (s, 3H), 2.12 (s, 3H).  $^{13}\text{C}$  NMR (150 MHz,  $\text{CDCl}_3$ )  $\delta$  203.33, 144.95, 139.60, 136.39, 130.54 (q,  $J = 32.4$  Hz), 129.87, 128.73, 127.85, 126.23 (q,  $J = 3.8$  Hz), 123.90 (q,  $J = 272.0$  Hz), 57.77, 52.70, 28.92, 21.56. **HRMS** (ESI)  $m/z$  calculated for  $\text{C}_{18}\text{H}_{17}\text{F}_3\text{NaO}_3\text{S}$   $[\text{M}+\text{Na}]^+$  393.0742, found 393.0748.

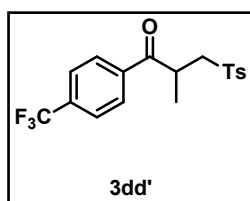

**2-Methyl-3-tosyl-1-(4-(trifluoromethyl)phenyl)propan-1-one (3dd'):** Yellow oil.  $^1\text{H}$  NMR (600 MHz,  $\text{CDCl}_3$ )  $\delta$  8.03 (d,  $J = 8.4$  Hz, 2H), 7.76-7.72 (m, 4H), 7.30 (d,  $J = 8.4$  Hz, 2H), 4.19-4.16 (m, 1H), 3.90 (dd,  $J = 14.4, 7.8$  Hz, 1H), 3.17 (dd,  $J = 14.4, 4.8$  Hz, 1H), 2.42 (s, 3H), 1.35 (d,  $J = 7.2$  Hz, 3H).  $^{13}\text{C}$  NMR (150 MHz,  $\text{CDCl}_3$ )  $\delta$  199.43, 145.03, 137.81, 136.39, 134.81 (q,  $J = 32.6$  Hz), 129.98, 128.88, 128.01, 125.86 (q,  $J = 3.8$  Hz), 125.47 (q,  $J = 272.0$  Hz), 58.71, 35.87, 21.63, 18.53. **HRMS** (ESI)  $m/z$  calculated for  $\text{C}_{18}\text{H}_{17}\text{F}_3\text{NaO}_3\text{S}$   $[\text{M}+\text{Na}]^+$  393.0742, found 393.0748.

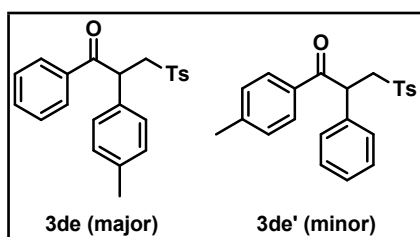

**1-Phenyl-2-(p-tolyl)-3-tosylpropan-1-one (3de, major) : 2-phenyl-1-(p-tolyl)-3-tosylpropan-1-one (3de', minor) = 4:3.**  $^1\text{H}$  NMR (600 MHz,  $\text{CDCl}_3$ )  $\delta$  7.88 (d,  $J = 8.4$  Hz, 2H, major), 7.80 (d,  $J = 7.8$  Hz, 1.5H, minor), 7.68 (d,  $J = 7.8$  Hz, 3.5H, major (2H)+minor (1.5H)), 7.48 (t,  $J = 7.8$  Hz, 1.5H, minor), 7.37 (t,  $J = 7.8$  Hz, 2H, major), 7.23-7.19 (m, 6H, major(2H)+minor(4H)), 7.18-7.16 (m, 1.75H, major(1H)+minor(0.75H)), 7.11 (d,  $J = 8.4$  Hz, 2H, major), 7.03 (d,  $J = 7.8$  Hz, 2H, major), 5.27-5.23 (m, 1.75H, major(1H)+minor(0.75H)), 4.42-4.37 (m, 1.75H, major(1H)+minor(0.75H)), 3.43-3.39 (m, 1.75H, major(1H)+minor(0.75H)), 2.38 (s, 5.25H, major(3H)+minor(2.25)), 2.34 (s, 2.25H, minor), 2.23 (s, 3H, major).  $^{13}\text{C}$  NMR (150 MHz,  $\text{CDCl}_3$ )  $\delta$  **3de**: 195.98, 144.65, 137.80, 136.48, 133.35, 130.06, 129.78, 129.33, 129.30, 128.88, 128.56, 128.11, 128.02, 59.35, 47.21, 21.61, 21.02; **3de'**: 195.43, 144.38, 136.80, 135.54, 133.47, 132.98, 129.79, 129.04, 128.88, 128.14, 128.02, 127.87, 125.98, 59.30, 47.42, 21.66, 21.02. **HRMS** (ESI)  $m/z$  calculated for  $\text{C}_{23}\text{H}_{22}\text{NaO}_3\text{S}$   $[\text{M}+\text{Na}]^+$  401.1180, found 401.1187.

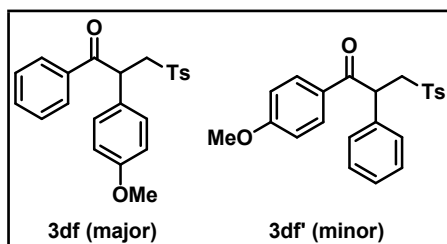

**2-(4-Methoxyphenyl)-1-phenyl-3-tosylpropan-1-one (3df, major) : 1-(4-methoxyphenyl)-2-phenyl-3-tosylpropan-1-one (3df', minor) = 6:5.**  $^1\text{H}$  NMR (600 MHz,  $\text{CDCl}_3$ )  $\delta$  7.89-7.88 (m, 3.67H, major(2H)+minor(1.67H)), 7.69-7.68 (m, 3.67H, major(2H)+minor(1.67H)), 7.49 (t,  $J = 7.2$  Hz, 1H, major), 7.37 (t,  $J = 7.8$  Hz, 2H, major), 7.24-7.20 (m, 7H, major(2H)+minor(5H)), 7.19-7.17 (m, 0.83H, minor), 7.14 (d,  $J = 9.0$  Hz, 2H, major), 6.85 (d,  $J =$

8.4 Hz, 1.67H, minor), 6.76 (d,  $J = 9.0$  Hz, 2H, major), 5.23 (dd,  $J = 9.0, 4.2$  Hz, 1.83H, major(1H)+minor(0.83H)), 4.42-4.35 (m, 1.83H, major(1H)+minor(0.83H)), 3.81 (s, 2.53H, minor), 3.71 (s, 3H, major), 3.43-3.40 (m, 1.83H, major(1H)+minor(0.83H)), 2.38 (s, 5.55H, major(3H)+minor(2.55H)).  $^{13}\text{C}$  NMR (150 MHz,  $\text{CDCl}_3$ )  $\delta$  **3df**: 196.05, 159.26, 144.63, 135.54, 133.33, 131.25, 129.78, 129.30, 128.86, 128.57, 128.11, 128.08, 114.77, 59.37, 55.23, 46.76, 21.60; **3df'**: 194.25, 163.76, 137.04, 136.52, 136.50, 129.76, 128.57, 128.45, 128.32, 128.11, 128.08, 127.83, 113.81, 59.33, 55.49, 47.19, 21.60. **HRMS** (ESI)  $m/z$  calculated for  $\text{C}_{23}\text{H}_{22}\text{NaO}_4\text{S}$   $[\text{M}+\text{Na}]^+$  417.1127, found 417.1136.

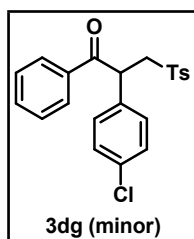

**2-(4-Chlorophenyl)-1-phenyl-3-tosylpropan-1-one (3dg)**: White solid; m.p: 95-97 °C;  $^1\text{H}$  NMR (600 MHz,  $\text{CDCl}_3$ )  $\delta$  7.87 (d,  $J = 7.8$  Hz, 2H), 7.66 (d,  $J = 7.8$  Hz, 2H), 7.52 (t,  $J = 7.2$  Hz, 1H), 7.40 (t,  $J = 7.8$  Hz, 2H), 7.25-7.18 (m, 4H), 7.16 (d,  $J = 8.4$  Hz, 2H), 5.27 (dd,  $J = 8.4, 4.8$  Hz, 1H), 4.31 (dd,  $J = 14.4, 8.4$  Hz, 1H), 3.44 (d,  $J = 14.4, 4.8$  Hz, 1H), 2.40 (s, 3H).  $^{13}\text{C}$  NMR (150 MHz,  $\text{CDCl}_3$ )  $\delta$  195.70, 144.86, 136.35, 135.22, 134.87, 134.09, 133.66, 129.84, 129.58, 129.52, 128.86, 128.71, 128.04, 59.12, 46.87, 21.61. **HRMS** (ESI)  $m/z$  calculated for  $\text{C}_{22}\text{H}_{19}\text{NaO}_3\text{S}$   $[\text{M}+\text{Na}]^+$  421.0638, found 421.0641.

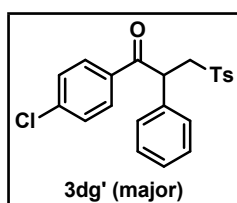

**1-(4-chlorophenyl)-2-phenyl-3-tosylpropan-1-one (3dg')**: White solid; m.p: 94-95 °C;  $^1\text{H}$  NMR (600 MHz,  $\text{CDCl}_3$ )  $\delta$  7.84 (d,  $J = 8.4$  Hz, 2H), 7.70 (d,  $J = 8.4$  Hz, 2H), 7.36 (d,  $J = 7.8$  Hz, 2H), 7.26-7.24 (m, 4H), 7.22-7.20 (m, 3H), 5.22 (dd,  $J = 8.4, 3.6$  Hz, 1H), 4.40 (dd,  $J = 13.8, 8.4$  Hz, 1H), 3.40 (dd,  $J = 13.8, 3.6$  Hz, 1H), 2.41 (s, 3H).  $^{13}\text{C}$  NMR (150 MHz,  $\text{CDCl}_3$ )  $\delta$  194.79, 144.81, 139.95, 136.43, 136.20, 133.87, 130.26, 129.86, 129.49, 128.96, 128.14, 128.09, 128.07, 59.23, 47.56, 21.62. **HRMS** (ESI)  $m/z$  calculated for  $\text{C}_{22}\text{H}_{19}\text{NaO}_3\text{S}$   $[\text{M}+\text{Na}]^+$  421.0636, found 421.0641.

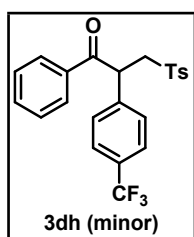

**1-Phenyl-3-tosyl-2-(4-(trifluoromethyl)phenyl)propan-1-one (3dh)**: Yellow oil;  $^1\text{H}$  NMR (600 MHz,  $\text{CDCl}_3$ )  $\delta$  7.90 (d,  $J = 8.4$  Hz, 2H), 7.65 (d,  $J = 7.8$  Hz, 2H), 7.54 (t,  $J = 7.8$  Hz, 1H), 7.48 (d,  $J = 8.4$  Hz, 2H), 7.42 (t,  $J = 8.4$  Hz, 2H), 7.36 (d,  $J = 8.4$  Hz, 2H), 7.21 (d,  $J = 8.4$  Hz, 2H), 5.37 (dd,  $J = 7.8, 5.4$  Hz, 1H), 4.31 (dd,  $J = 14.4, 7.8$  Hz, 1H), 3.51 (dd,  $J = 14.4, 5.4$  Hz, 1H), 2.39 (s, 3H).  $^{13}\text{C}$  NMR (150 MHz,  $\text{CDCl}_3$ )  $\delta$  195.46, 144.91, 140.24, 136.26, 135.10 (q,  $J = 30.0$  Hz), 133.84, 129.83, 128.88, 128.79, 128.72, 128.00, 126.22 (q,  $J = 3.0$  Hz), 123.75 (q,  $J = 272.0$  Hz), 59.01, 47.31, 21.55. **HRMS** (ESI)  $m/z$  calculated for  $\text{C}_{23}\text{H}_{19}\text{F}_3\text{NaO}_3\text{S}$   $[\text{M}+\text{Na}]^+$  455.0912, found 455.0905.

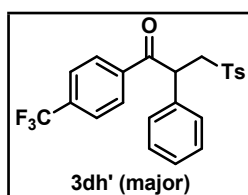

**2-Phenyl-3-tosyl-1-(4-(trifluoromethyl)phenyl)propan-1-one (3dh')**: Yellow oil;  $^1\text{H}$  NMR (600 MHz,  $\text{CDCl}_3$ )  $\delta$  8.01 (d,  $J = 8.4$  Hz, 2H), 7.72 (d,  $J = 8.4$  Hz, 2H), 7.66 (d,  $J = 8.4$  Hz, 2H), 7.28-7.26 (m, 4H), 7.24-7.21 (m, 3H), 5.27 (dd,  $J = 9.0, 3.6$  Hz, 1H), 4.42 (dd,  $J = 13.8, 9.0$  Hz, 1H),

3.42 (dd,  $J = 13.8, 3.0$  Hz, 1H), 2.41 (s, 3H).  $^{13}\text{C}$  NMR (150 MHz,  $\text{CDCl}_3$ )  $\delta$  195.20, 144.90, 138.35, 136.41, 135.75, 134.60 (q,  $J = 30.0$  Hz), 129.90, 129.60, 129.17, 128.30, 128.13, 128.05, 125.68 (q,  $J = 3.0$  Hz), 123.45 (q,  $J = 273.0$  Hz), 59.24, 47.87, 21.62. **HRMS** (ESI)  $m/z$  calculated for  $\text{C}_{23}\text{H}_{19}\text{F}_3\text{NaO}_3\text{S}$   $[\text{M}+\text{Na}]^+$  455.0910, found 455.0905.

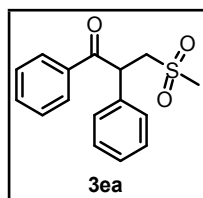

**3-(methylsulfonyl)-1,2-diphenylpropan-1-one (3ea):** White solid; m.p: 88-89 °C;  $^1\text{H}$  NMR (600 MHz,  $\text{CDCl}_3$ )  $\delta$  7.98 (d,  $J = 8.4$  Hz, 2H), 7.51 (t,  $J = 7.4$  Hz, 1H), 7.40 (t,  $J = 7.8$  Hz, 2H), 7.32-7.35 (m, 4H), 7.25-7.28 (m, 1H), 5.29 (dd,  $J = 8.2, 5.0$  Hz, 1H), 4.20 (dd,  $J = 14.4, 8.2$  Hz, 1H), 3.41 (dd,  $J = 14.4, 5.0$  Hz, 1H), 2.72 (s, 3H).  $^{13}\text{C}$  NMR (150 MHz,  $\text{CDCl}_3$ )  $\delta$  196.57, 136.24, 135.26, 133.70, 129.69, 129.05, 128.77, 128.35, 128.31, 58.17, 48.48, 42.52.

**HRMS** (ESI)  $m/z$  calculated for  $\text{C}_{16}\text{H}_{16}\text{NaO}_3\text{S}$   $[\text{M}+\text{Na}]^+$  311.0712, found 311.0720.

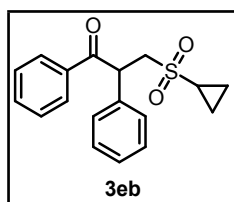

**3-(cyclopropylsulfonyl)-1,2-diphenylpropan-1-one (3eb):** Yellow oil;  $^1\text{H}$  NMR (600 MHz,  $\text{CDCl}_3$ )  $\delta$  7.99 (d,  $J = 7.8$  Hz, 2H), 7.51 (t,  $J = 7.2$  Hz, 1H), 7.40 (t,  $J = 7.8$  Hz, 2H), 7.35 (d,  $J = 7.2$  Hz, 2H), 7.31 (t,  $J = 7.8$  Hz, 2H), 7.25 (t,  $J = 7.2$  Hz, 1H), 5.31 (dd,  $J = 8.4, 4.5$  Hz, 1H), 4.31 (dd,  $J = 14.4, 8.4$  Hz, 1H), 3.41 (dd,  $J = 14.4, 4.5$  Hz, 1H), 2.19-2.11 (m, 1H), 1.24-1.17 (m, 1H), 1.14-1.08 (m, 1H), 0.98-0.92 (m, 1H), 0.86-0.79 (m, 1H).  $^{13}\text{C}$  NMR (150 MHz,  $\text{CDCl}_3$ )  $\delta$  196.50, 136.64, 135.42, 133.59, 129.53, 128.98, 128.76, 128.31, 128.18, 57.13, 47.95, 30.80, 5.51, 4.87. **HRMS** (ESI)  $m/z$  calculated for  $\text{C}_{18}\text{H}_{18}\text{NaO}_3\text{S}$   $[\text{M}+\text{Na}]^+$  337.0869, found 337.0873.

**HRMS** (ESI)  $m/z$  calculated for  $\text{C}_{18}\text{H}_{18}\text{NaO}_3\text{S}$   $[\text{M}+\text{Na}]^+$  337.0869, found 337.0873.

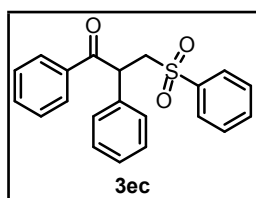

**1,2-diphenyl-3-(phenylsulfonyl)propan-1-one (3ec):** White solid; m.p: 100-101 °C;  $^1\text{H}$  NMR (600MHz,  $\text{CDCl}_3$ )  $\delta$  7.90 (d,  $J = 7.8$  Hz, 2H), 7.82 (d,  $J = 7.8$  Hz, 2H), 7.56 (t,  $J = 7.2$  Hz, 1H), 7.48 (t,  $J = 7.4$  Hz, 1H), 7.43 (t,  $J = 7.8$  Hz, 2H), 7.37 (t,  $J = 7.8$  Hz, 2H), 7.24-7.22 (m, 4H), 7.20-7.16 (m, 1H), 5.30 (dd,  $J = 8.4, 3.6$  Hz, 1H), 4.43 (dd,  $J = 14.2, 8.4$  Hz, 1H), 3.46 (dd,  $J = 14.2, 3.6$  Hz, 1H).  $^{13}\text{C}$  NMR (150 MHz,  $\text{CDCl}_3$ )  $\delta$  195.83, 139.43, 136.42, 135.46, 133.74, 133.48, 129.42, 129.22, 128.91, 128.65, 128.17, 128.05, 128.04, 59.20, 47.54. **HRMS** (ESI)  $m/z$  calculated for  $\text{C}_{21}\text{H}_{18}\text{NaO}_3\text{S}$   $[\text{M}+\text{Na}]^+$  373.0869, found 373.0875.

**HRMS** (ESI)  $m/z$  calculated for  $\text{C}_{21}\text{H}_{18}\text{NaO}_3\text{S}$   $[\text{M}+\text{Na}]^+$  373.0869, found 373.0875.

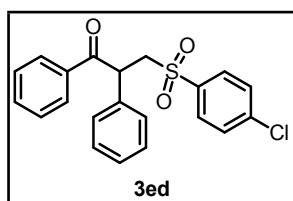

**3-((4-chlorophenyl)sulfonyl)-1,2-diphenylpropan-1-one (3ed):** Yellow solid; m.p: 94-95 °C;  $^1\text{H}$  NMR (600 MHz,  $\text{CDCl}_3$ )  $\delta$  7.89 (d,  $J = 8.0$  Hz, 2H), 7.72 (d,  $J = 8.4$  Hz, 2H), 7.50 (t,  $J = 7.4$  Hz, 1H), 7.44-7.35 (m, 4H), 7.29-7.13 (m, 5H), 5.28 (dd,  $J = 8.4, 4.2$  Hz, 1H), 4.40 (dd,  $J = 14.4, 8.4$  Hz, 1H), 3.48 (dd,  $J = 14.4, 4.2$  Hz, 1H).  $^{13}\text{C}$  NMR (150 MHz,  $\text{CDCl}_3$ )  $\delta$  195.75, 140.47, 137.90, 136.15, 135.34, 133.60, 129.58, 129.48, 128.87, 128.69, 128.17, 128.12, 59.33, 47.67. **HRMS** (ESI)  $m/z$  calculated for  $\text{C}_{21}\text{H}_{17}\text{ClNaO}_3\text{S}$   $[\text{M}+\text{Na}]^+$  407.0479, found 407.0480.

**HRMS** (ESI)  $m/z$  calculated for  $\text{C}_{21}\text{H}_{17}\text{ClNaO}_3\text{S}$   $[\text{M}+\text{Na}]^+$  407.0479, found 407.0480.



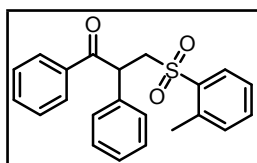

**1,2-Diphenyl-3-(o-tolylsulfonyl)propan-1-one (3ee):** White solid; m.p.: 64-65 °C;  $^1\text{H}$  NMR (600 MHz,  $\text{CDCl}_3$ )  $\delta$  7.86-7.85 (m, 3H), 7.49 (t,  $J$  = 7.2 Hz, 1H), 7.41 (t,  $J$  = 7.2 Hz, 1H), 7.36 (t,  $J$  = 7.8 Hz, 2H), 7.28 (d,  $J$  = 7.2 Hz, 1H), 7.26-7.23 (m, 4H), 7.20-7.15 (m, 2H), 5.28 (dd,  $J$  = 8.4, 3.0 Hz, 1H), 4.51 (dd,  $J$  = 14.4, 8.4 Hz, 1H), 3.42 (dd,  $J$  = 14.4, 3.0 Hz, 1H).  $^{13}\text{C}$  NMR (150 MHz,  $\text{CDCl}_3$ )  $\delta$  195.86, 138.45, 137.17, 136.55, 135.47, 133.76, 133.41, 132.70, 130.09, 129.40, 128.85, 128.56, 128.09, 128.00, 126.37, 58.20, 47.39, 20.33. **HRMS** (ESI)  $m/z$  calculated for  $\text{C}_{22}\text{H}_{20}\text{NaO}_3\text{S}$   $[\text{M}+\text{Na}]^+$  387.1022, found 387.1031.

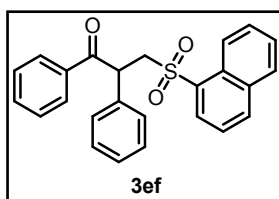

**3-(naphthalen-1-ylsulfonyl)-1,2-diphenylpropan-1-one (3ef):** White solid; m.p: 106-107 °C;  $^1\text{H}$  NMR (600 MHz,  $\text{CDCl}_3$ )  $\delta$  8.66 (d,  $J$  = 8.4 Hz, 1H), 8.07 (d,  $J$  = 7.2 Hz, 1H), 7.93 (d,  $J$  = 8.2 Hz, 1H), 7.83 (d,  $J$  = 8.2 Hz, 1H), 7.79 (d,  $J$  = 7.8 Hz, 2H), 7.64 (t,  $J$  = 7.8 Hz, 1H), 7.52 (t,  $J$  = 7.5 Hz, 1H), 7.39 (t,  $J$  = 7.2 Hz, 1H), 7.31 (t,  $J$  = 7.2 Hz, 1H), 7.27 (t,  $J$  = 7.8 Hz, 2H) 7.11-7.00 (m, 5H), 5.28 (dd,  $J$  = 8.6, 4.0 Hz, 1H), 4.54 (dd,  $J$  = 14.2, 8.6 Hz, 1H), 3.54 (dd,  $J$  = 14.2, 4.0 Hz, 1H).  $^{13}\text{C}$  NMR (150 MHz,  $\text{CDCl}_3$ )  $\delta$  195.82, 136.27, 135.48, 135.32, 134.32, 134.13, 133.43, 130.55, 129.26, 129.21, 128.92, 128.88, 128.62, 128.13, 127.95, 127.10, 124.22, 124.16, 58.72, 47.48. **HRMS** (ESI)  $m/z$  calculated for  $\text{C}_{25}\text{H}_{20}\text{NaO}_3\text{S}$   $[\text{M}+\text{Na}]^+$  423.1025, found 423.1025.

## 4. Investigation of mechanism

### 4.1 Control experiments

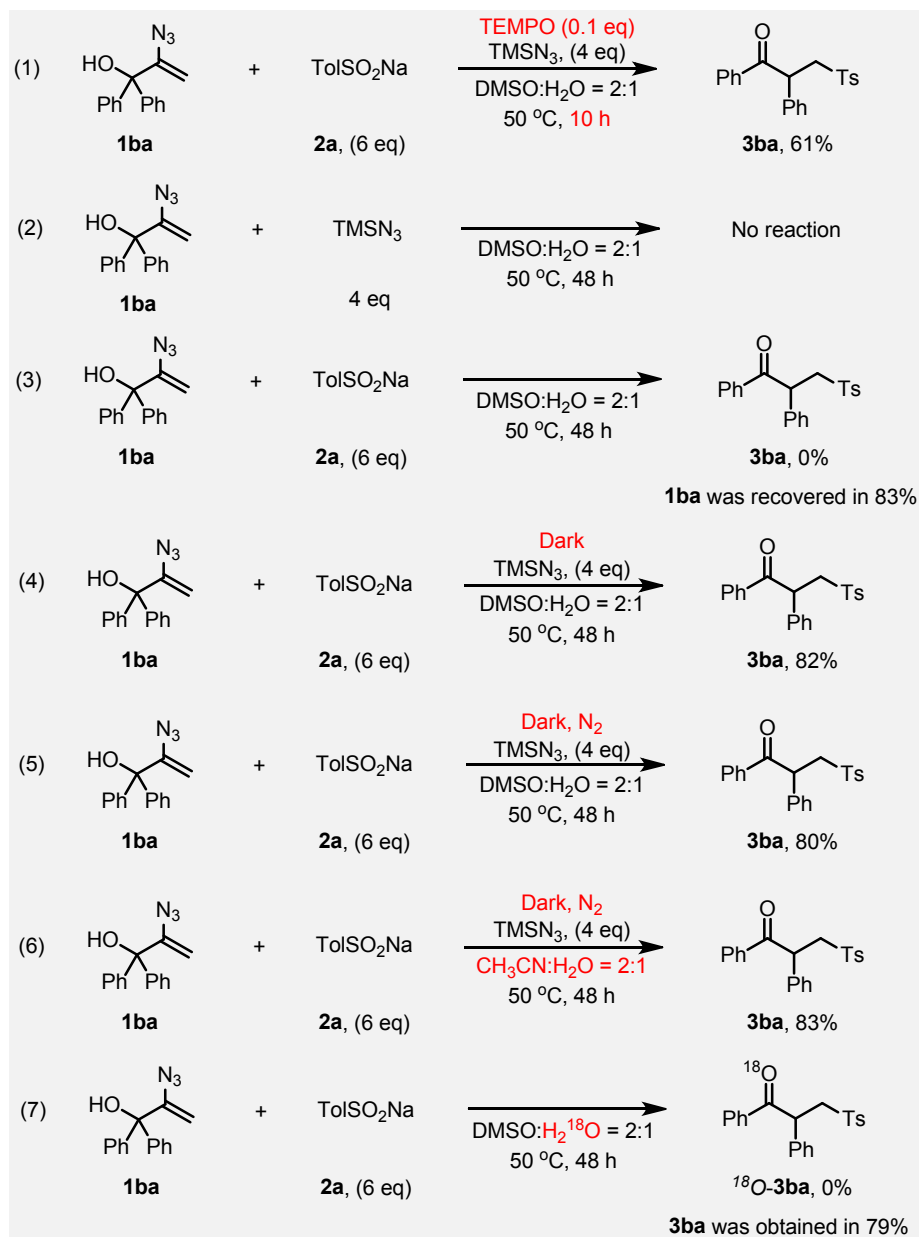

**Figure S1.** Control experiments

The catalytic amount of TEMPO were beneficial to accelerate the rate of the transformation,<sup>[3]</sup> despite the yield of desired product would be lowered (eq. 1). Further information on the generation of sulfonyl radical was obtained by submission of allylic alcohols (**1ba**) to various reaction conditions (eq. 2 and 3), which revealed a dual role of TMSN<sub>3</sub>: in the absence of TMSN<sub>3</sub>, no reaction took place, whereas in the presence of 4 equivalents, product **3ba** was afforded in high yield (84%). This implies that TMSN<sub>3</sub> plays a critical role in the generation of sulfonyl radical. Meanwhile, the results were listed in eq. 4-6 showed that solvent, oxygen, and light all did not affect the generation of sulfonyl radical. Therefore, the sulfonyl radical may be generated from the homolysis process under the action of TMSN<sub>3</sub>. The experiment of eq. 7 demonstrated that the oxygen of carbonyl in the product was not from water.

## 4.2 Deuterium-labeling studies

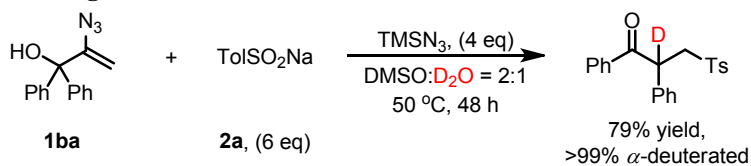

A Schlenk tube was placed compound **1ba** (0.5 mmol), TolSO<sub>2</sub>Na (3.0 mmol), TMSN<sub>3</sub> (2.0 mmol), D<sub>2</sub>O (0.7 mL), and DMSO (1.4 mL). Then the mixture was stirred at 50 °C for 48h. Upon completion of the reaction, saturated NH<sub>4</sub>Cl (aq.) was added to quench the reaction and the mixture was extracted with CH<sub>2</sub>Cl<sub>2</sub> (3 × 10 mL). The combined organic layers were washed with brine, dried over MgSO<sub>4</sub>, filtered, and concentrated *in vacuo*. The resulting mixture was purified by silica gel column chromatography using (petroleum ether:ethyl acetate = 6:1) to afford deuterated product **d-3ba** in 79% yield.

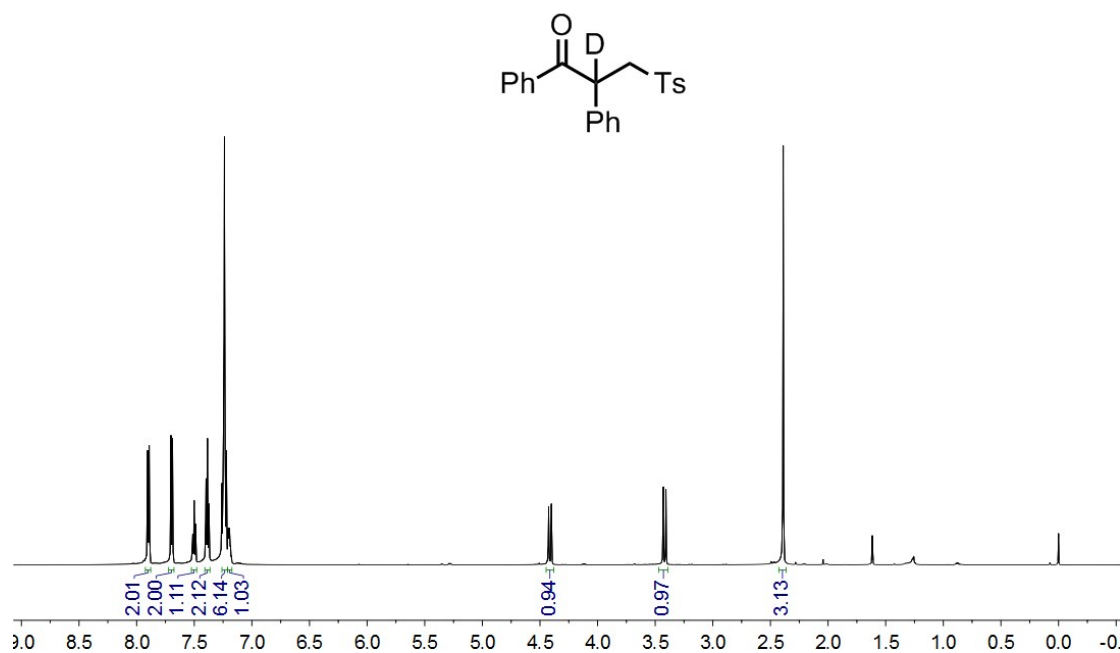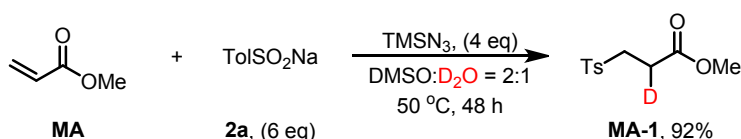

A Schlenk tube was placed compound **MA** (0.5 mmol), TolSO<sub>2</sub>Na (3.0 mmol), TMSN<sub>3</sub> (2.0 mmol), D<sub>2</sub>O (0.7 mL), and DMSO (1.4 mL). Then the mixture was stirred at 50 °C for 48h. Upon completion of the reaction, saturated NH<sub>4</sub>Cl (aq.) was added to quench the reaction and the mixture was extracted with CH<sub>2</sub>Cl<sub>2</sub> (3 × 10 mL). The combined organic layers were washed with brine, dried over MgSO<sub>4</sub>, filtered, and concentrated *in vacuo*. The resulting mixture was purified by silica gel column chromatography using (petroleum ether:ethyl acetate = 10:1) to afford deuterated product **MA-1** in 92% yield.<sup>[4]</sup>

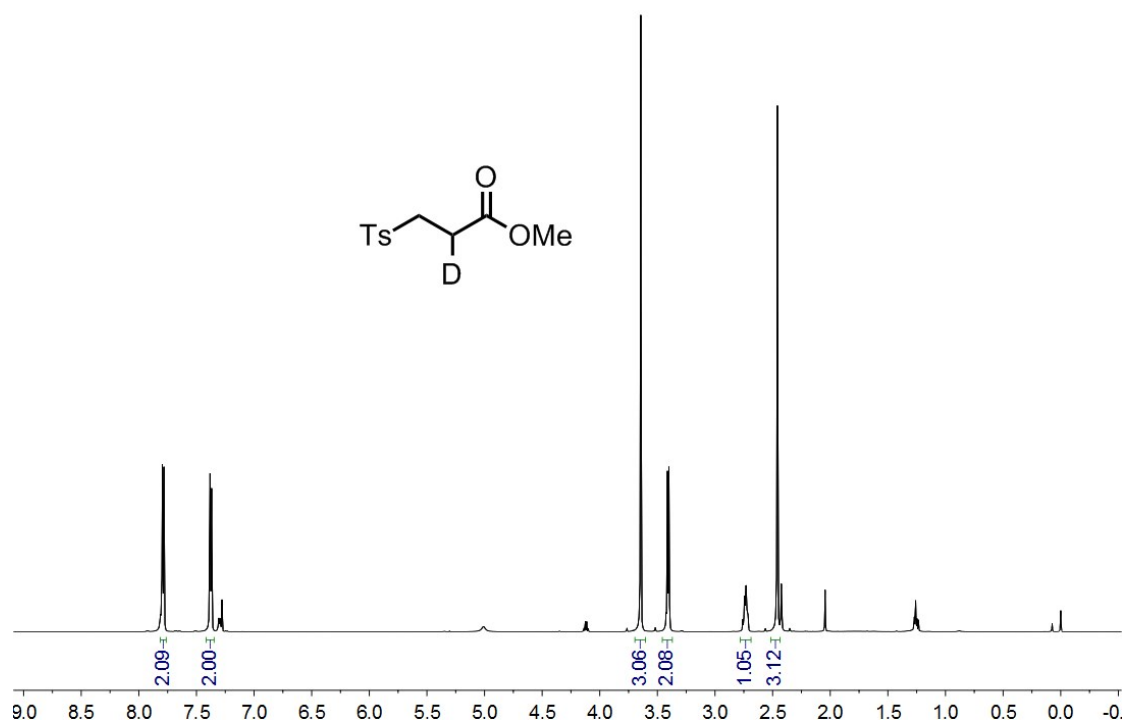

### 4.3 Research on the key intermediate

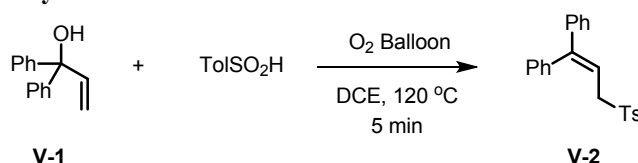

Allylic alcohol **V-1** (0.3 mmol) and *p*-toluene sulfonic acid (0.6 mmol) in dichloroethane (2 mL) were stirred at 120 °C with an O<sub>2</sub> balloon for 5 min. Upon completion of the reaction (as indicated by TLC analysis), the solvent was removed in vacuo and the residue was purified by flash column chromatography on silica gel with petroleum/ethyl acetate as the eluent to afford pure product **V-2** in 85% yield.<sup>[5]</sup>

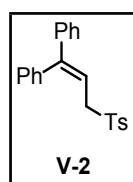

**(3-Tosylprop-1-ene-1,1-diyl)dibenzene (V-2):** Yellow solid; <sup>1</sup>H NMR (600 MHz, CDCl<sub>3</sub>) δ 7.66 (d, *J* = 8.4 Hz, 2H), 7.29-7.22 (m, 8H), 7.17-7.15 (m, 2H), 6.70 (d, *J* = 8.4 Hz, 2H), 6.12 (t, *J* = 7.8 Hz, 1H), 3.90 (d, *J* = 7.8 Hz, 2H), 2.44 (s, 3H). <sup>13</sup>C NMR (150 MHz, CDCl<sub>3</sub>) δ 149.60, 144.63, 140.59, 137.86, 135.81, 129.70, 129.27, 128.52, 128.33, 128.24, 127.77, 127.45, 114.28, 57.60, 21.66.

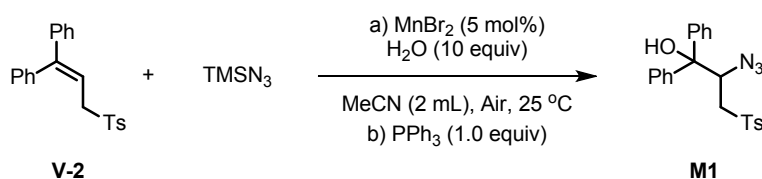

Compound **V-2** (0.3 mmol), TMSN<sub>3</sub> (0.6 mmol), MnBr<sub>2</sub> (0.015 mmol) and H<sub>2</sub>O (3 mmol) in

MeCN (2 mL) at room temperature under ambient air. Monitoring the reaction by TLC to confirm whether the **V-2** disappeared or not. Then PPh<sub>3</sub> (0.3 mmol) was added and the mixture was stirred for 10 min. finally, the mixture was purified through column chromatography to afford the pure product **M1** in 82% yield.<sup>[6]</sup>

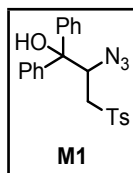

**2-Azido-1,1-diphenyl-3-tosylpropan-1-ol (M1):** Yellow solid; <sup>1</sup>H NMR (600 MHz, CDCl<sub>3</sub>) δ 7.73 (d, *J* = 8.4 Hz, 2H), 7.50 (d, *J* = 7.8 Hz, 2H), 7.38-7.34 (m, 6H), 7.29-7.26 (m, 3H), 7.23-7.22 (m, 1H), 4.97 (d, *J* = 9.0 Hz, 1H), 3.36-3.32 (m, 1H), 3.21 (d, *J* = 8.4 Hz, 1H), 2.77 (s, 1H), 2.45 (s, 3H). <sup>13</sup>C NMR (150 MHz, CDCl<sub>3</sub>) δ 144.97, 143.82, 136.69, 130.04, 128.87, 128.83, 127.85, 127.83, 127.78, 125.47, 125.25, 80.58, 64.04, 56.92, 21.69. **HRMS** (ESI) *m/z* calculated for C<sub>22</sub>H<sub>21</sub>N<sub>3</sub>NaO<sub>3</sub>S [M+Na]<sup>+</sup> 430.1212, found 430.1201

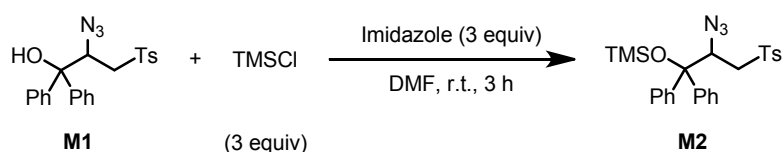

Compound **M1** (0.3 mmol), TMSCl (0.9 mmol), and imidazole (0.9 mmol) in DMF (2 mL) was stirred at room temperature for 3 h. Upon completion of the reaction, saturated NH<sub>4</sub>Cl (aq.) was added to quench the reaction and the mixture was extracted with CH<sub>2</sub>Cl<sub>2</sub> (3 × 10 mL). The combined organic layers were washed with brine, dried over MgSO<sub>4</sub>, filtered, and concentrated *in vacuo*. The resulting mixture was purified by silica gel column chromatography using (petroleum ether:ethyl acetate = 10:1) to afford deuterated product **M2** in 94% yield.

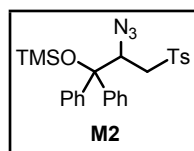

**(2-azido-1,1-diphenyl-3-tosylpropoxy)trimethylsilane (M2):** White solid; <sup>1</sup>H NMR (600 MHz, CDCl<sub>3</sub>) δ 7.68 (d, *J* = 7.8 Hz, 2H), 7.31-7.29 (m, 2H), 7.28 (d, *J* = 7.8 Hz, 2H), 7.26-7.23 (m, 6H), 7.19-7.16 (m, 2H), 4.75 (d, *J* = 9.6 Hz, 1H), 3.36 (d, *J* = 14.4 Hz, 1H), 2.65 (dd, *J* = 14.4, 9.6 Hz, 1H), 2.37 (s, 3H), -0.26 (s, 9H). <sup>13</sup>C NMR (150 MHz, CDCl<sub>3</sub>) δ 143.89, 140.60, 140.07, 135.54, 128.99, 127.36, 127.27, 127.20, 127.14, 127.04, 127.02, 127.00, 82.10, 62.26, 20.62, 0.59. **HRMS** (ESI) *m/z* calculated for C<sub>25</sub>H<sub>29</sub>N<sub>3</sub>NaO<sub>3</sub>SSi [M+Na]<sup>+</sup> 502.1603, found 502.1597.

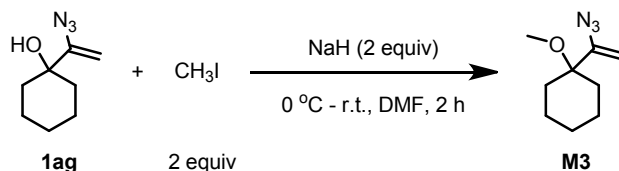

Compound **1ag** (0.3 mmol), and NaH (0.6 mmol) in DMF (2 mL) was stirred at 0 °C. After 0.5 h, CH<sub>3</sub>I (0.6 mmol) was added to the reaction system. Then the reaction was stirred at room temperature for 2 h. Upon completion of the reaction, saturated NH<sub>4</sub>Cl (aq.) was added to quench the reaction and the mixture was extracted with CH<sub>2</sub>Cl<sub>2</sub> (3 × 10 mL). The combined organic layers were washed with brine, dried over MgSO<sub>4</sub>, filtered, and concentrated *in vacuo*. The resulting mixture was purified by silica gel column chromatography using (petroleum ether:ethyl acetate = 15:1) to afford deuterated product **M3** in 96% yield.

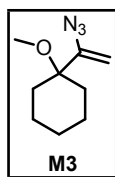

**1-(1-azidovinyl)-1-methoxycyclohexane (M3):** Yellow oil;  $^1\text{H}$  NMR (600 MHz,  $\text{CDCl}_3$ )  $\delta$  4.94 (d,  $J = 1.2$  Hz, 1H), 4.87 (d,  $J = 1.2$  Hz, 1H), 3.11 (s, 3H), 1.86-1.84 (m, 2H), 1.60-1.52 (m, 3H), 1.50-1.46 (m, 4H), 1.25-1.20 (m, 1H).  $^{13}\text{C}$  NMR (150 MHz,  $\text{CDCl}_3$ )  $\delta$  149.74, 99.42, 76.57, 49.55, 32.68, 25.57, 21.51. **HRMS** (ESI)  $m/z$  calculated for  $\text{C}_9\text{H}_{15}\text{N}_3\text{NaO}$   $[\text{M}+\text{Na}]^+$  204.1108, found 204.1113.

#### 4.4 The detection of TMSOH and $(\text{TMS})_2\text{O}$ by gas chromatography-mass spectrometer (GC-MS)

The Si-containing species in the reaction mixture were identified as TMSOH and  $(\text{TMS})_2\text{O}$  by GC-MS.

File : D:\2018\2018-SW丙交酯\师大-1-2018-12-21.D  
Operator :  
Acquired : 21 Dec 2018 20:14 using AcqMethod k.m  
Instrument : Instrument #1  
Sample Name:  
Msc Info :  
Vial Number: 1

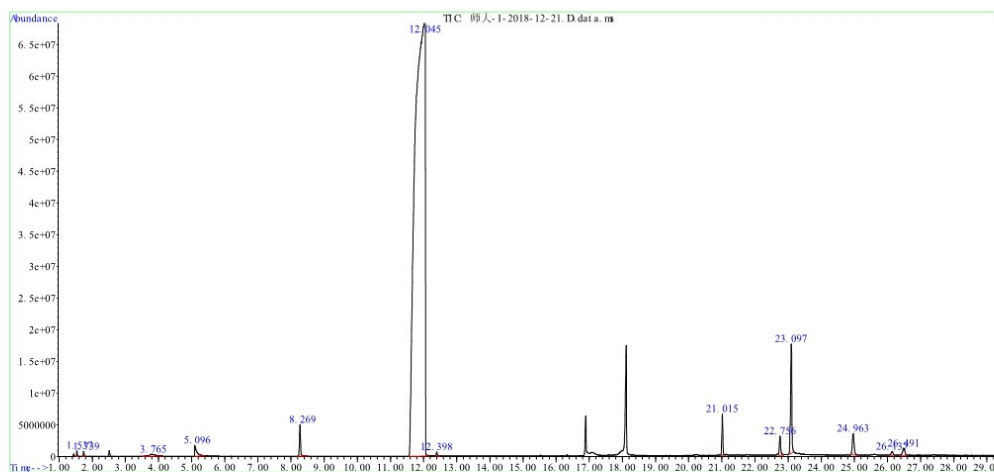

\*\* Search Report Page 1 of 1 \*\*

Unknown: Scan 264 (1.536 min): -1-2018-12-21.D\data.ms  
Compound in Library Factor = 256

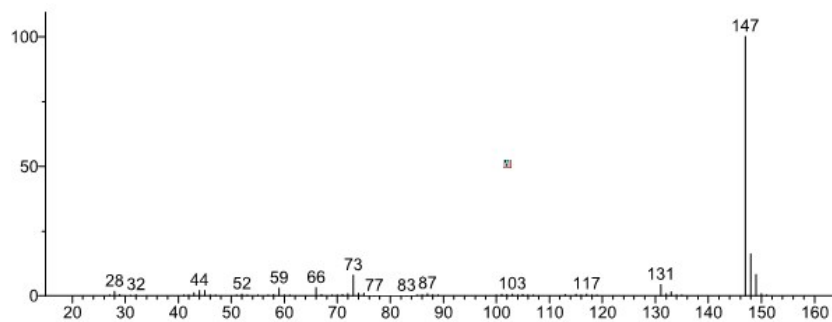

Hit 1 : Disiloxane, hexamethyl-  
C6H18OSi2; MF: 924; RMF: 925; Prob 84.1%; CAS: 107-46-0; Lib: replib; ID: 19826.

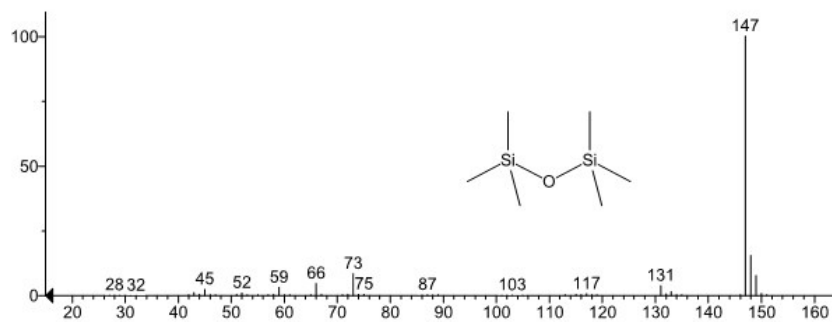

Hit 2 : Disiloxane, hexamethyl-  
C6H18OSi2; MF: 913; RMF: 916; Prob 84.1%; CAS: 107-46-0; Lib: replib; ID: 19825.

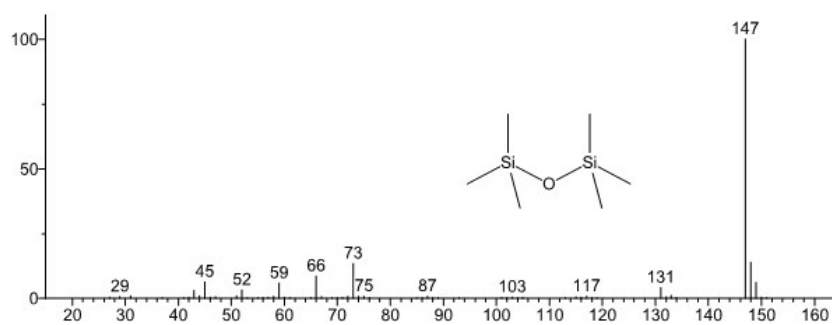

\*\* Search Report Page 1 of 1 \*\*

Unknown: Scan 670 (3.773 min): -1-2018-12-21.D\data.ms  
Compound in Library Factor = -343

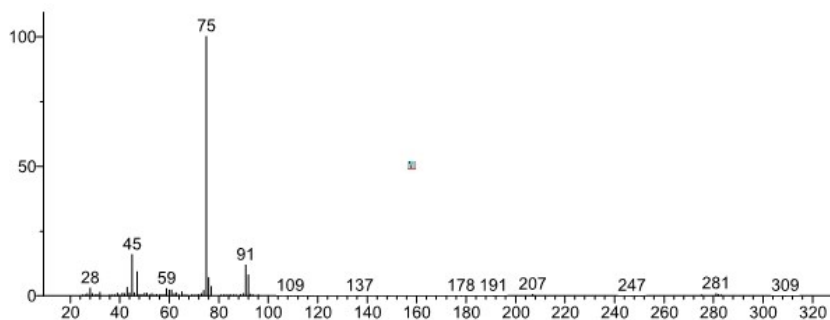

Hit 1 : Silanol, trimethyl-  
C3H10OSi; MF: 761; RMF: 793; Prob 62.1%; CAS: 1066-40-6; Lib: mainlib; ID: 38640.

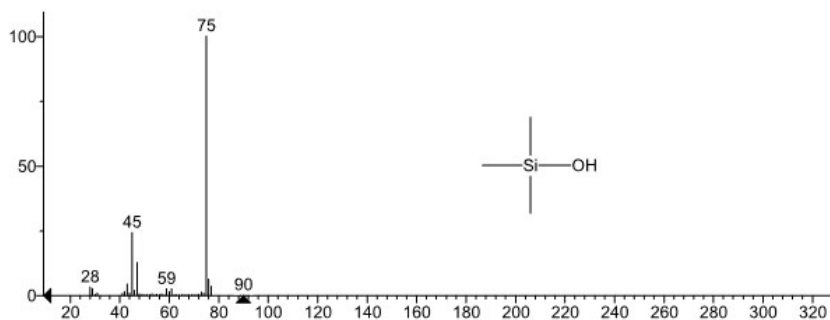

Hit 2 : Silanol, trimethyl-  
C3H10OSi; MF: 737; RMF: 888; Prob 62.1%; CAS: 1066-40-6; Lib: replib; ID: 9172.

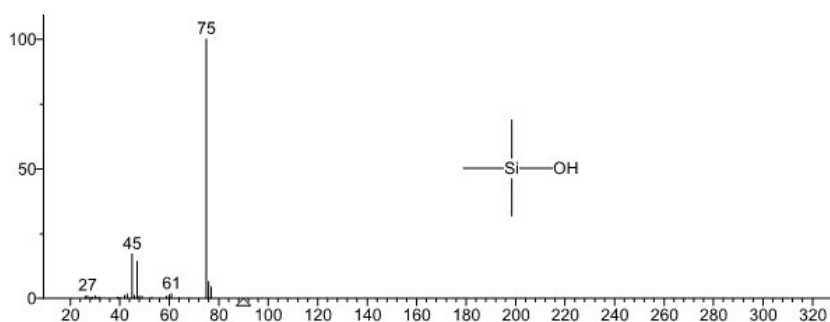



## 5. X-ray Structure of 3an and 3ba

Table S2. Crystal Structure of 1,2-diphenyl-3-tosylpropan-1-one 3an (CCDC No. 1897875)

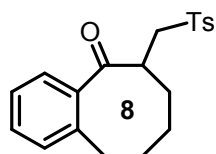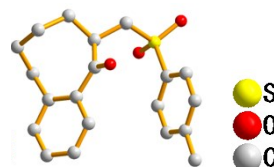

|                                   |                                                                                                                                     |
|-----------------------------------|-------------------------------------------------------------------------------------------------------------------------------------|
| Empirical formula                 | C <sub>20</sub> H <sub>22</sub> O <sub>3</sub> S                                                                                    |
| Temperature                       | 293 K                                                                                                                               |
| Wavelength                        | 0.71073 Å                                                                                                                           |
| Unit cell dimensions              | a = 9.2575(7) Å<br>b = 9.6845(7) Å<br>c = 10.1145(8) Å<br>alpha = 79.903(6) deg.<br>beta = 84.497(7) deg.<br>gamma = 80.659(6) deg. |
| Volume                            | 878.80(12) Å <sup>3</sup>                                                                                                           |
| Z                                 | 2                                                                                                                                   |
| Calculated density                | 1.294 g/m <sup>3</sup>                                                                                                              |
| Absorption coefficient            | 0.199 mm <sup>-1</sup>                                                                                                              |
| F(000)                            | 364.0                                                                                                                               |
| Crystal size                      | 0.15 × 0.12 × 0.1 mm <sup>3</sup>                                                                                                   |
| Theta range for data collection   | 7.622 to 58.388 deg.                                                                                                                |
| Reflections collected / unique    | 6448 / 3958 [R(int) = 0.0181]                                                                                                       |
| Data / restraints / parameters    | 3958 / 0 / 218                                                                                                                      |
| Goodness-of-fit on F <sup>2</sup> | 1.017                                                                                                                               |
| Final R indices [I > 2sigma(I)]   | R <sub>1</sub> = 0.0503, wR <sub>2</sub> = 0.1134                                                                                   |
| R indices (all data)              | R <sub>1</sub> = 0.0731, wR <sub>2</sub> = 0.1308                                                                                   |

**Table S3. Crystal Structure of 1,2-diphenyl-3-tosylpropan-1-one 3ba (CCDC No. 1897779)**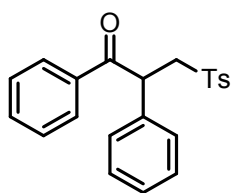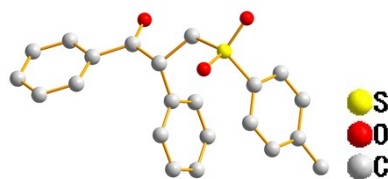

|                                   |                                                                                                                            |
|-----------------------------------|----------------------------------------------------------------------------------------------------------------------------|
| Empirical formula                 | C <sub>22</sub> H <sub>20</sub> O <sub>3</sub> S                                                                           |
| Temperature                       | 293 K                                                                                                                      |
| Wavelength                        | 0.71073 Å                                                                                                                  |
| Unit cell dimensions              | a = 19.855(3) Å<br>b = 5.7928(7) Å<br>c = 16.427(2) Å<br>alpha = 90.0 deg.<br>beta = 105.359(13) deg.<br>gamma = 90.0 deg. |
| Volume                            | 1821.9(4) Å <sup>3</sup>                                                                                                   |
| Z                                 | 4                                                                                                                          |
| Calculated density                | 1.329 g/m <sup>3</sup>                                                                                                     |
| Absorption coefficient            | 0.196 mm <sup>-1</sup>                                                                                                     |
| F(000)                            | 768.0                                                                                                                      |
| Crystal size                      | 0.15 × 0.12 × 0.1 mm <sup>3</sup>                                                                                          |
| Theta range for data collection   | 7.06 to 58.402 deg.                                                                                                        |
| Reflections collected / unique    | 7635 / 4207 [R(int) = 0.0293]                                                                                              |
| Data / restraints / parameters    | 4207 / 0 / 236                                                                                                             |
| Goodness-of-fit on F <sup>2</sup> | 1.018                                                                                                                      |
| Final R indices [I > 2sigma(I)]   | R <sub>1</sub> = 0.0495, wR <sub>2</sub> = 0.0986                                                                          |
| R indices (all data)              | R <sub>1</sub> = 0.0877, wR <sub>2</sub> = 0.1149                                                                          |

## 6. NMR Spectra of the Products

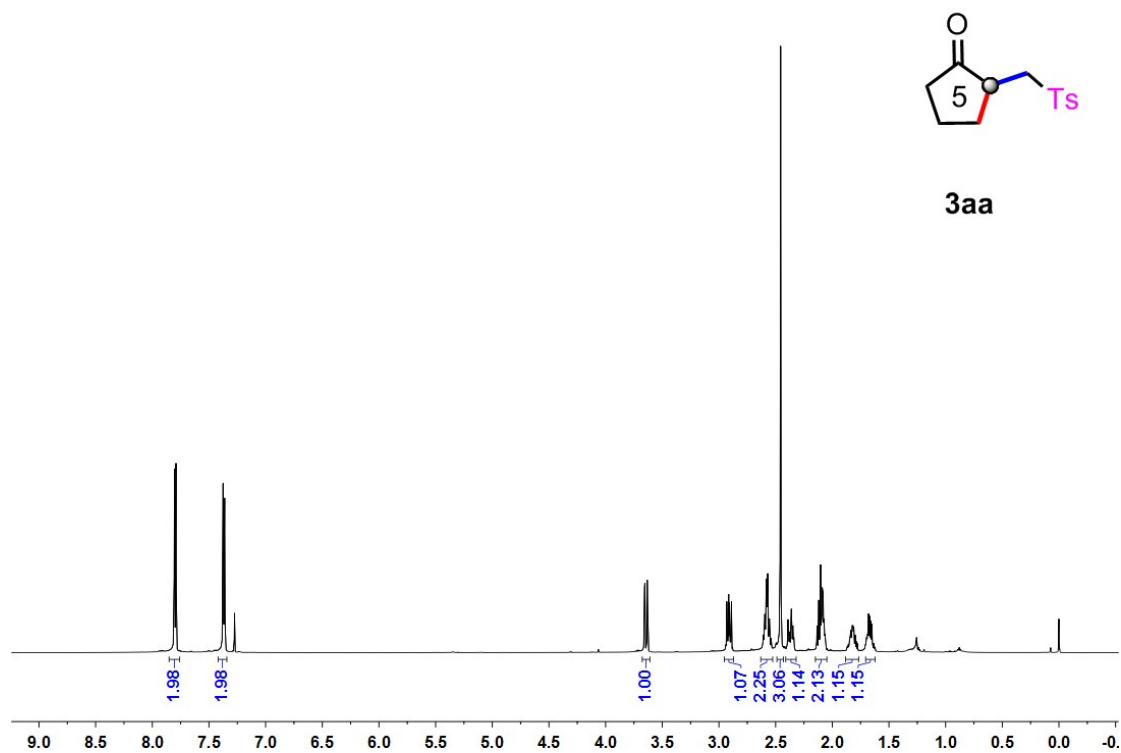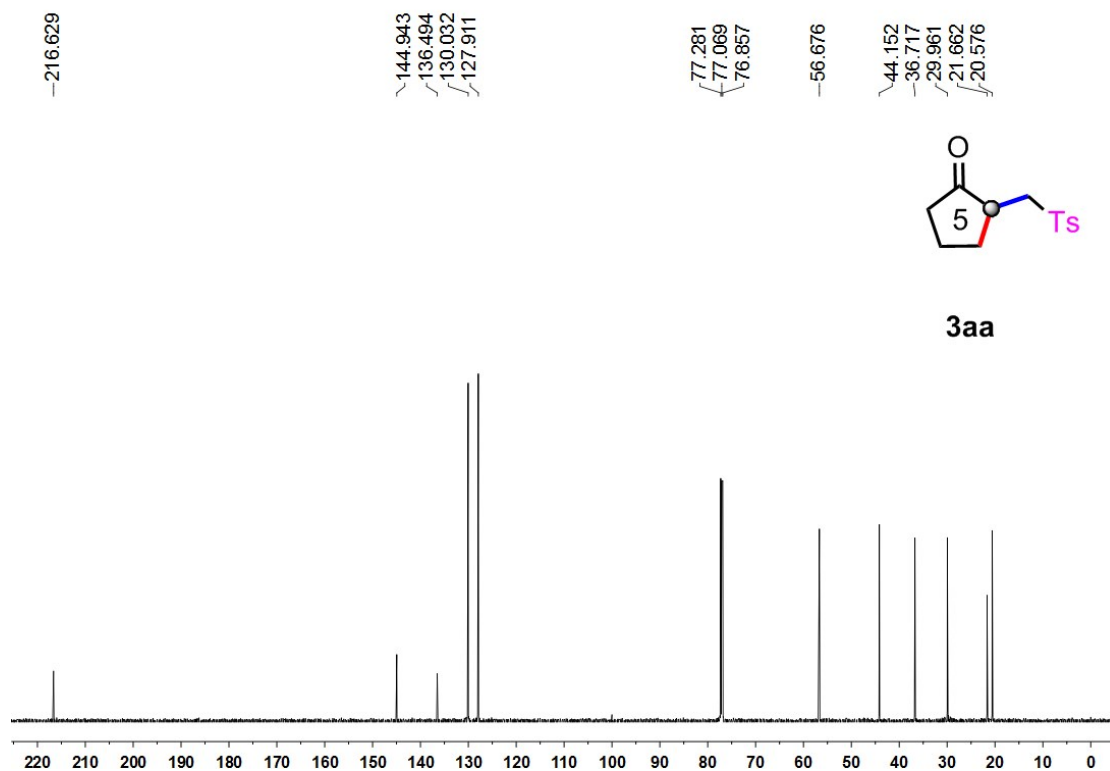

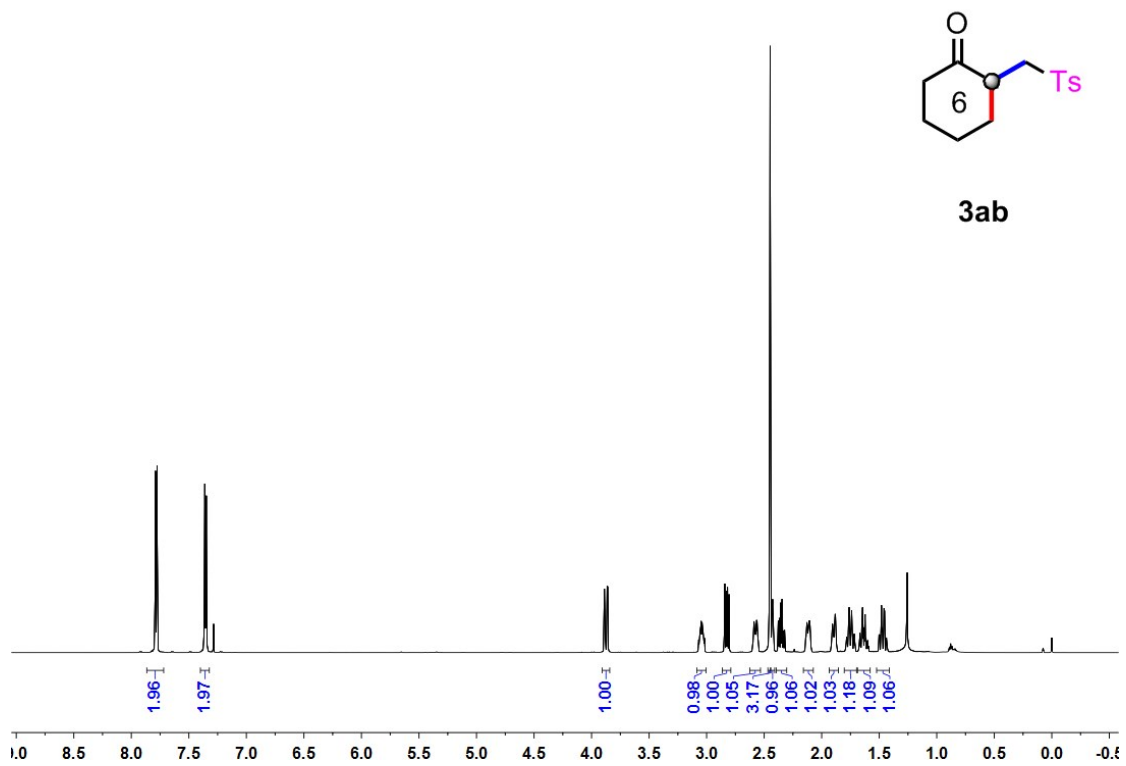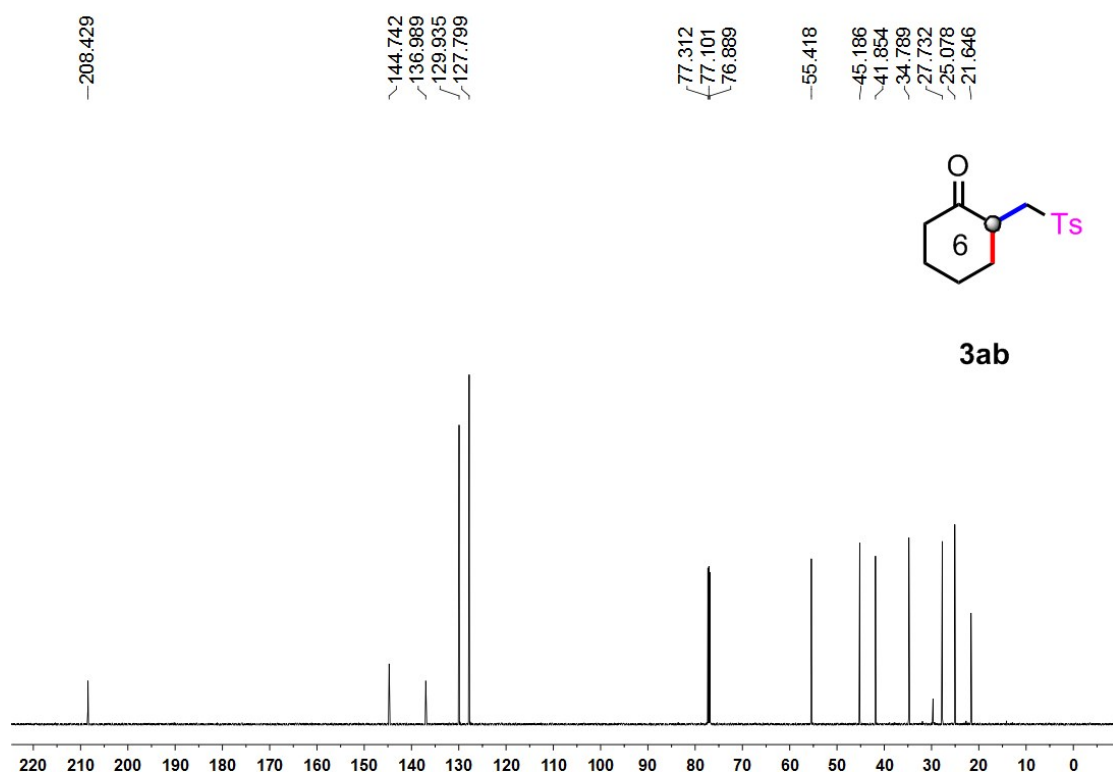

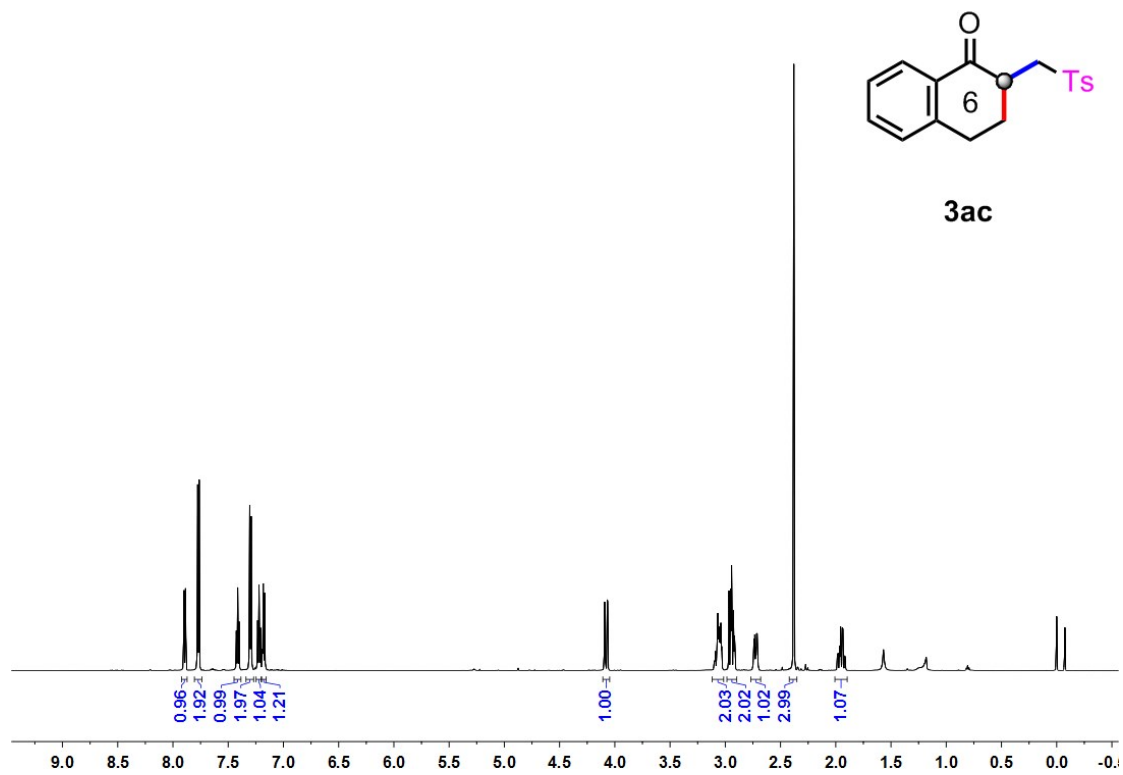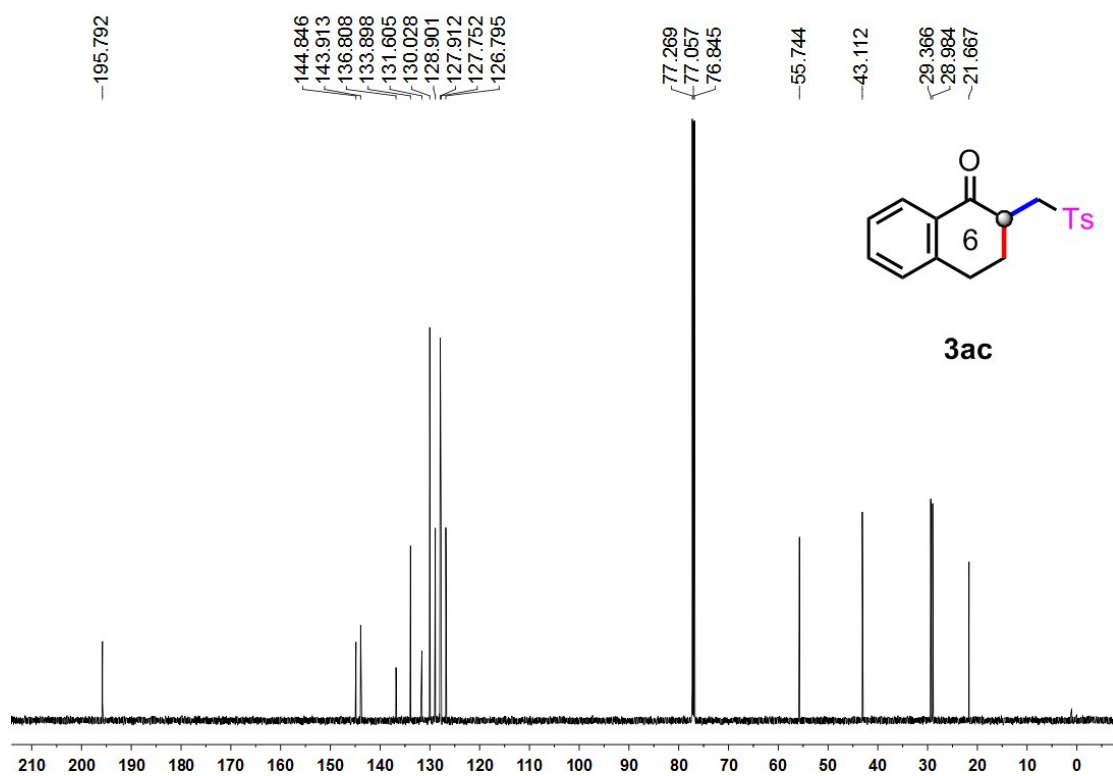

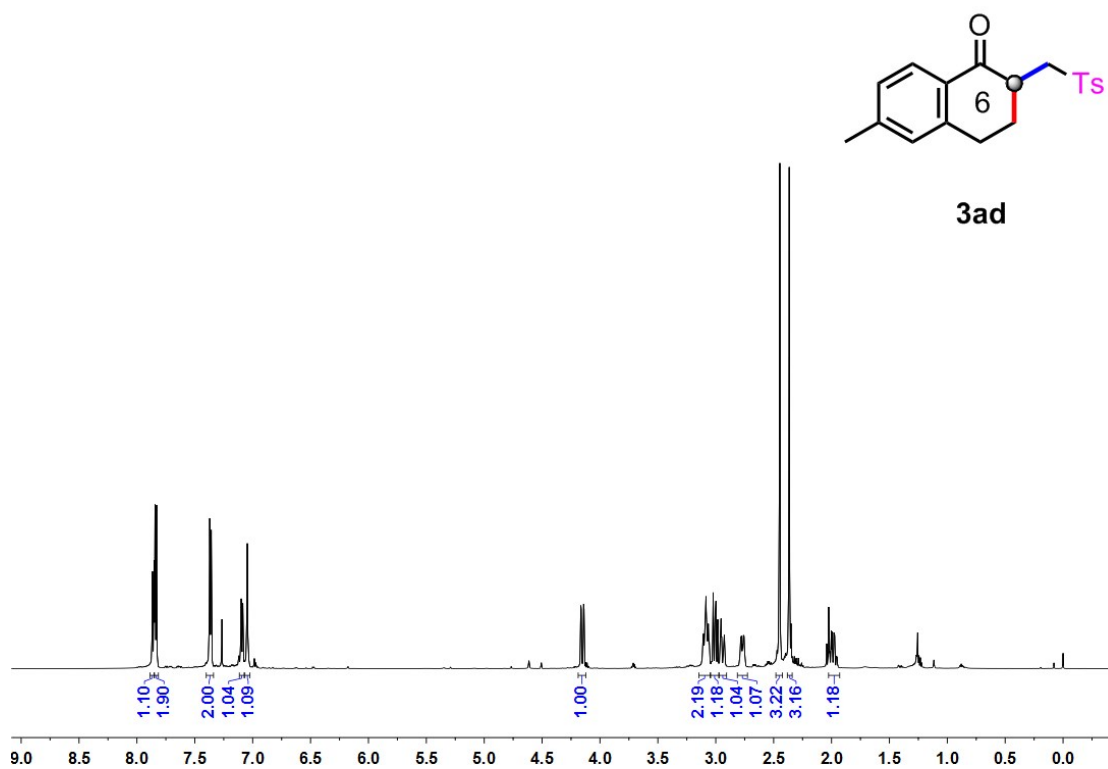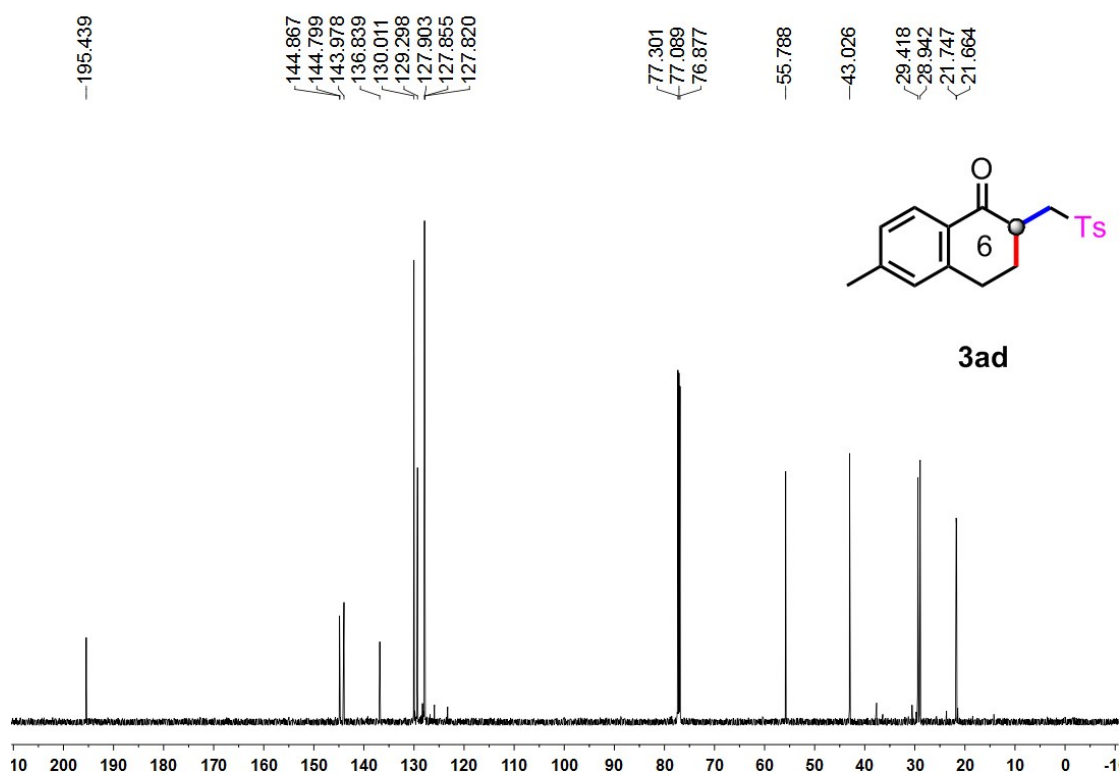

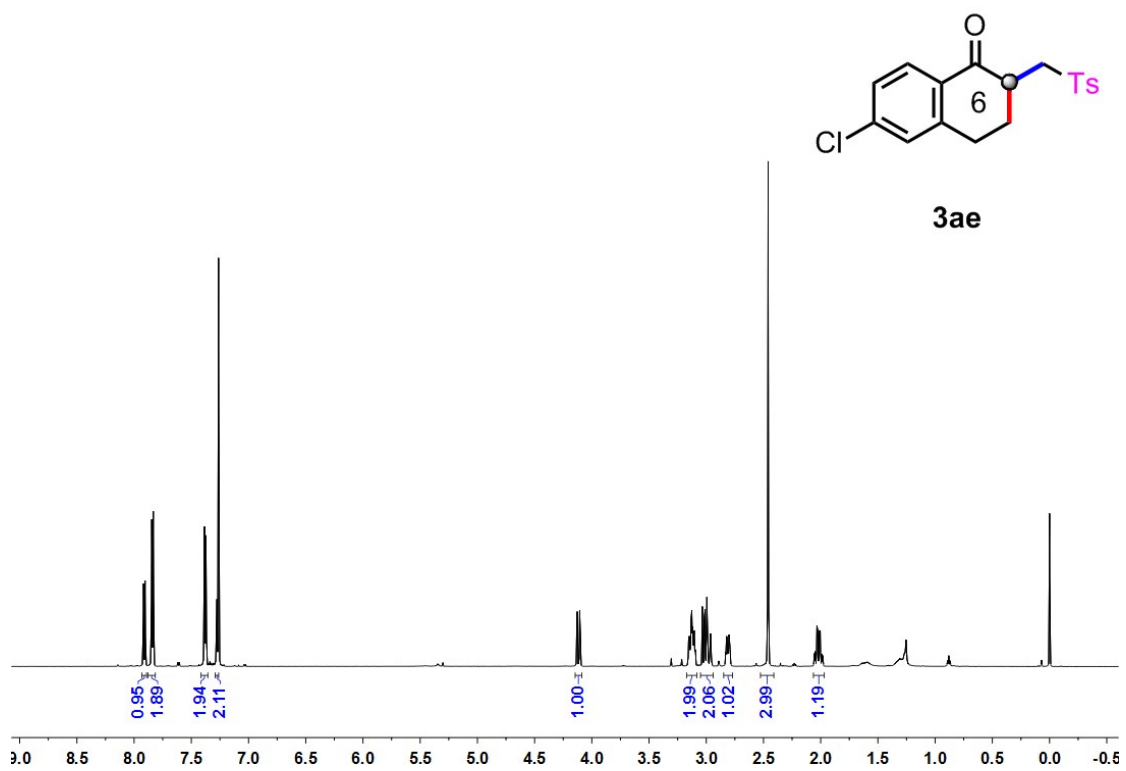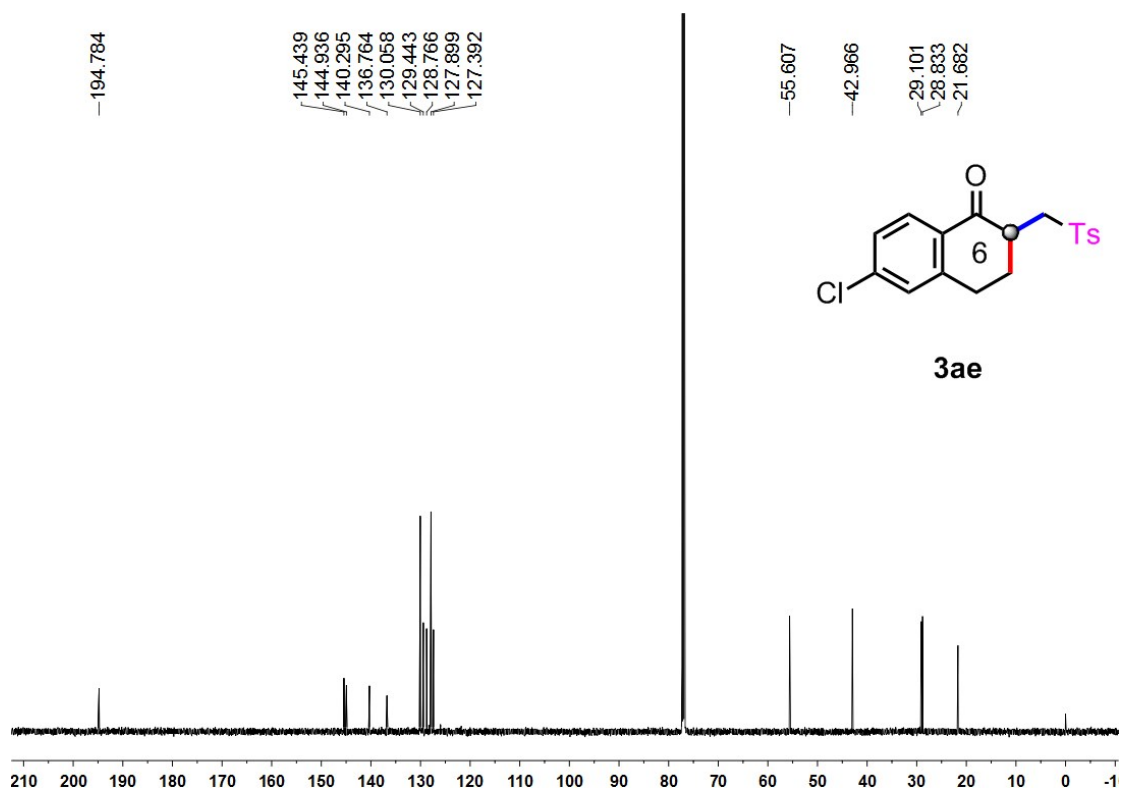

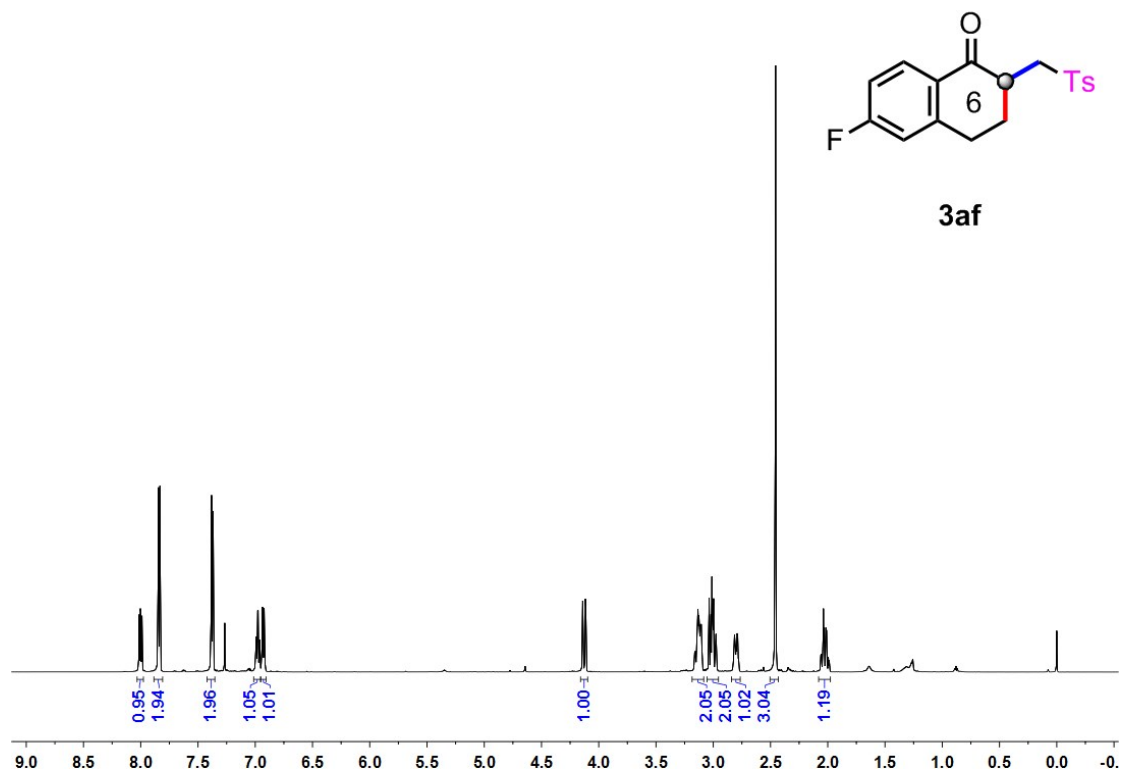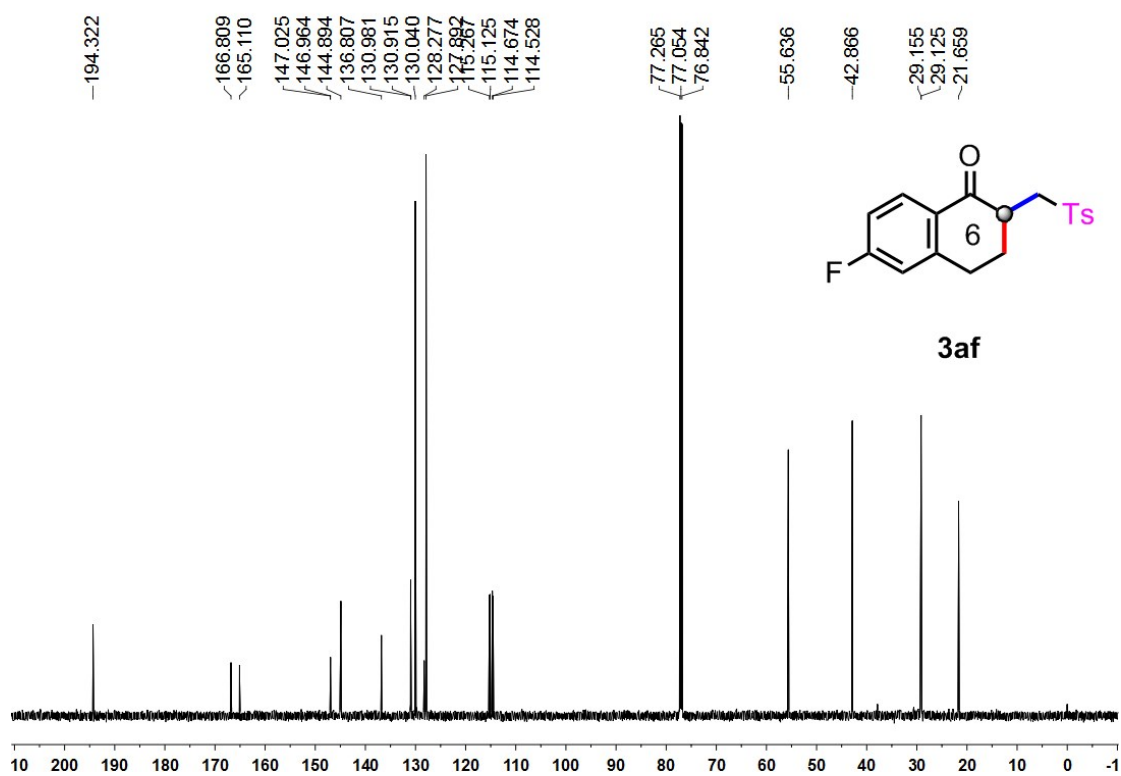



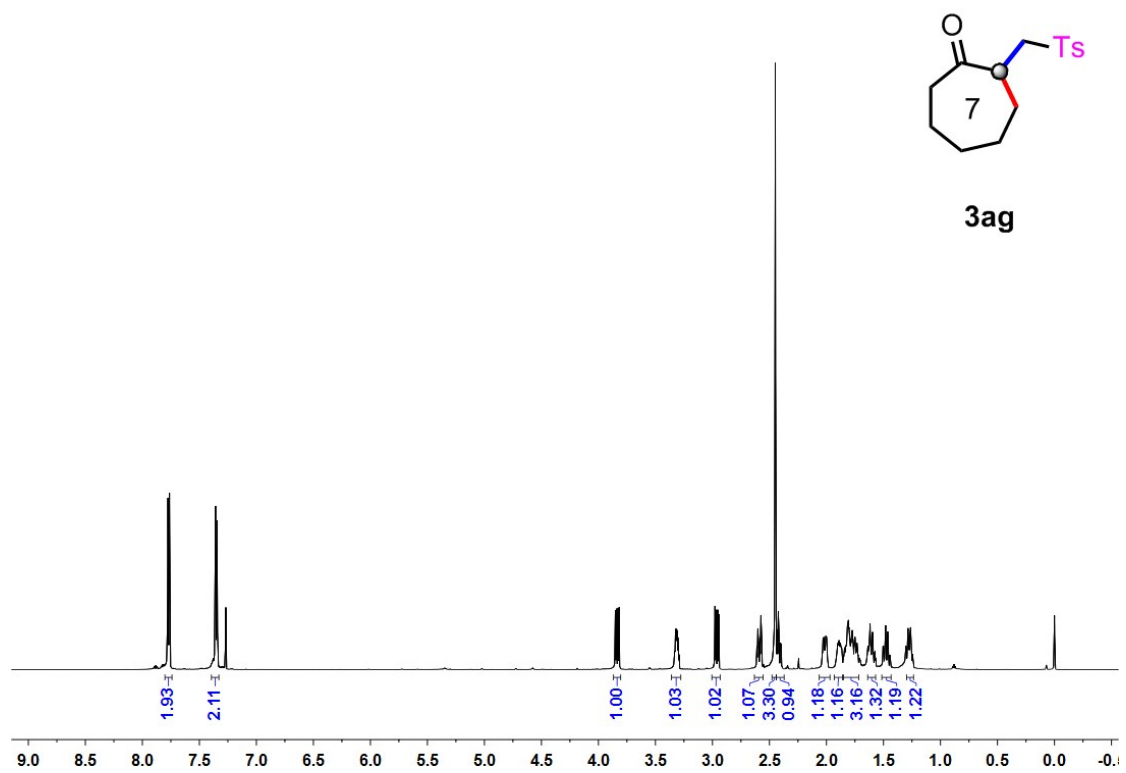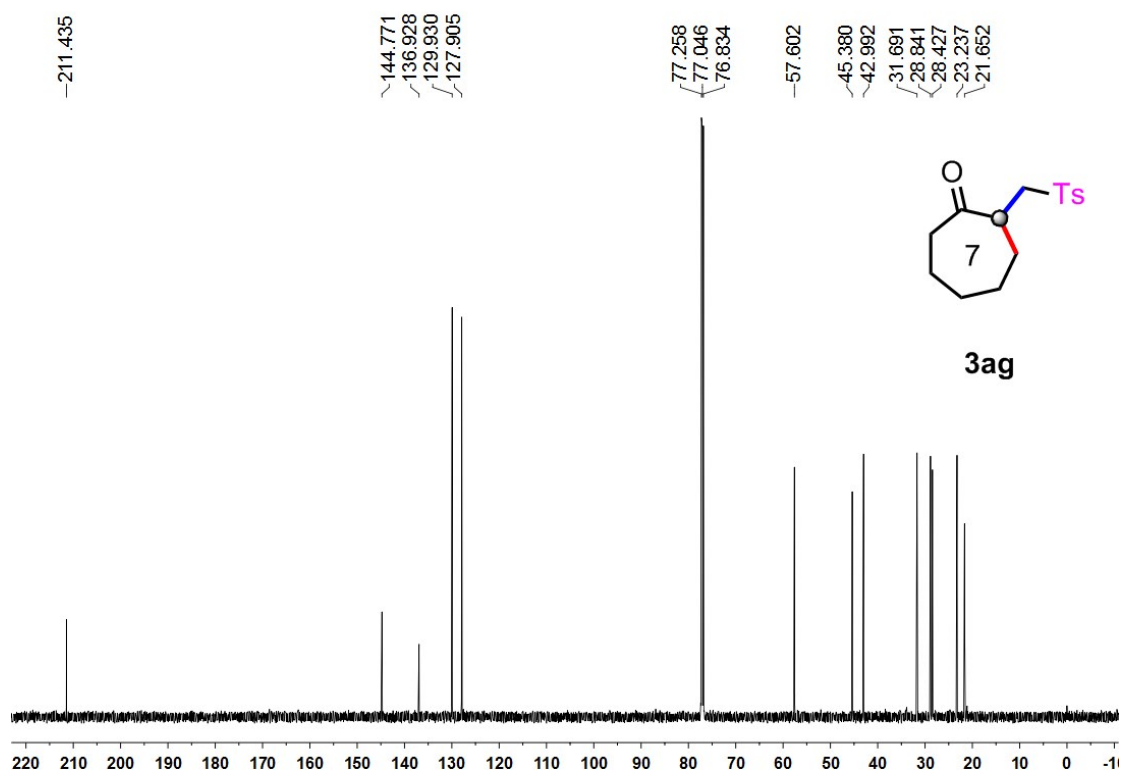

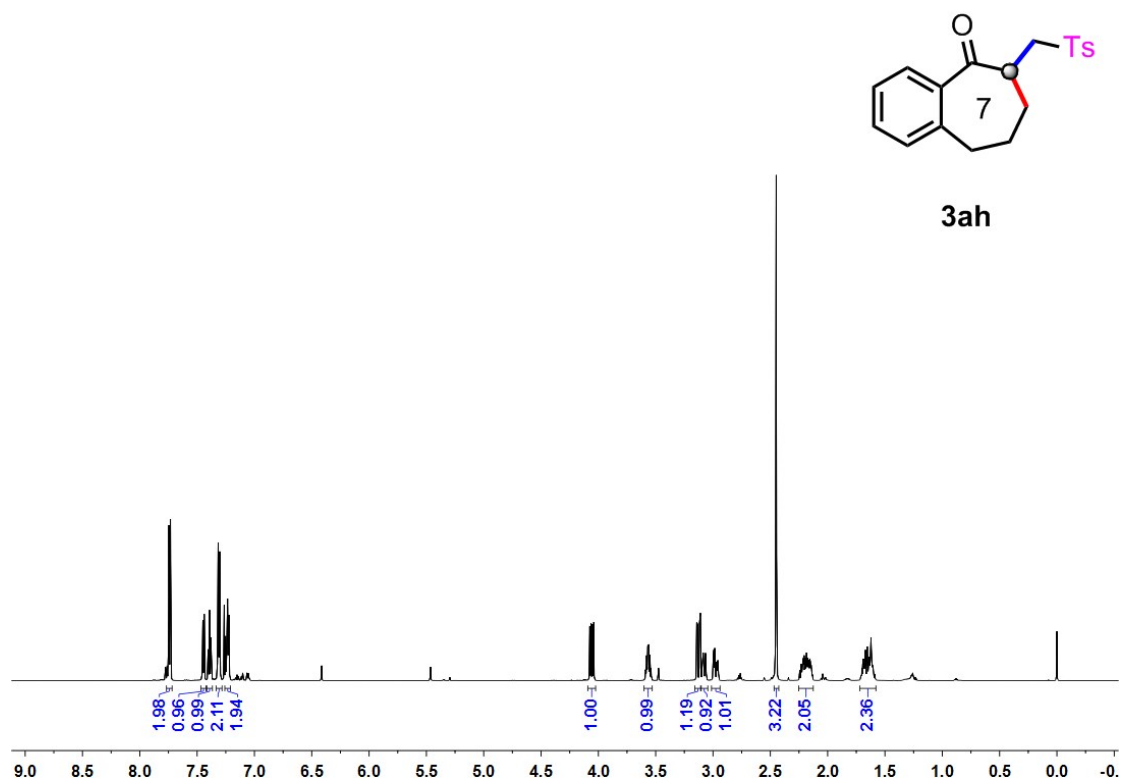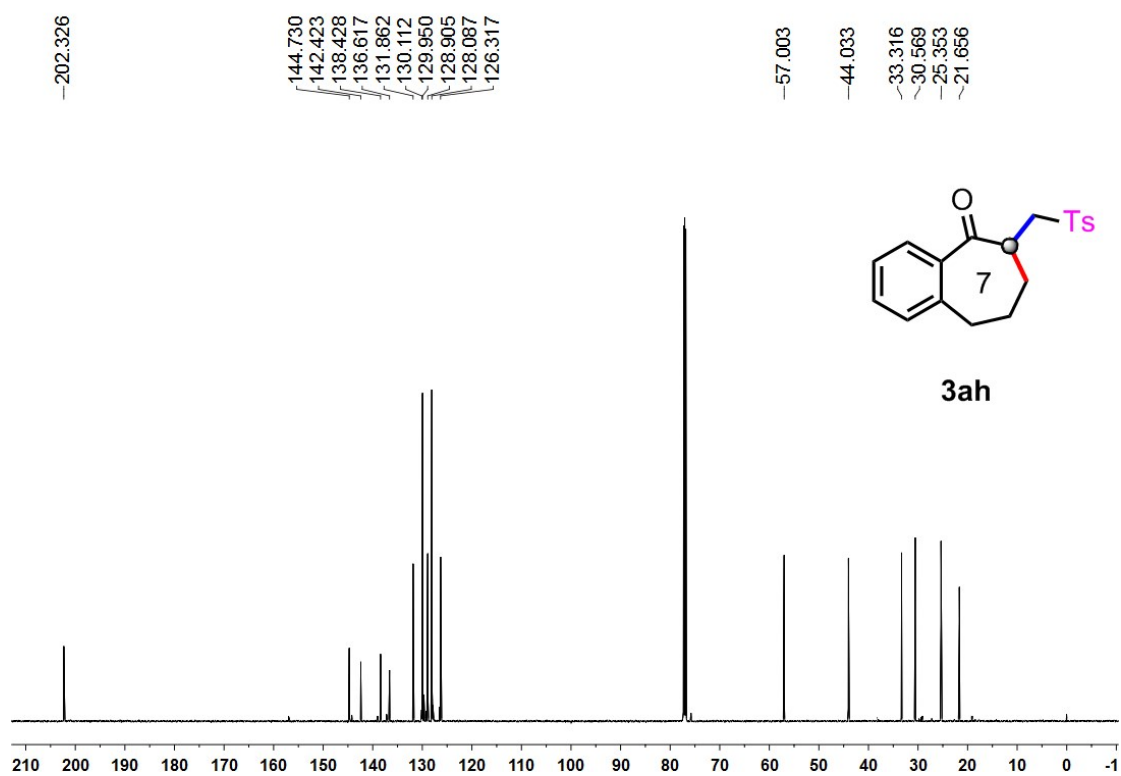

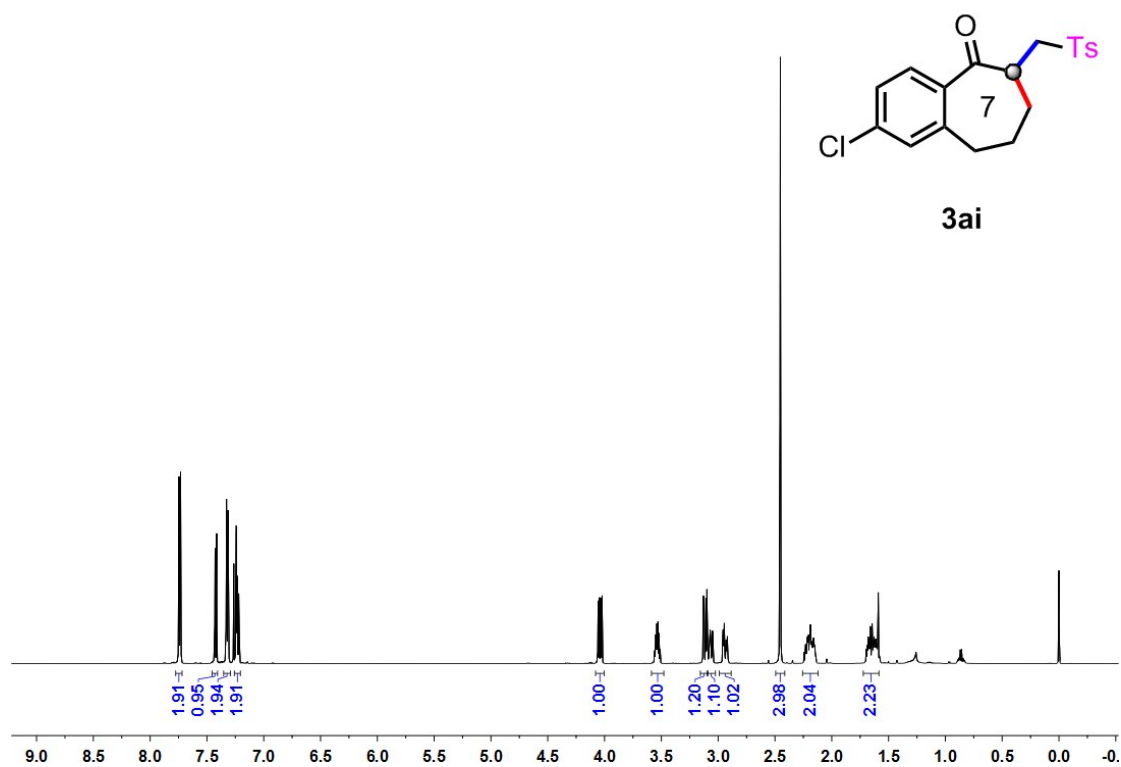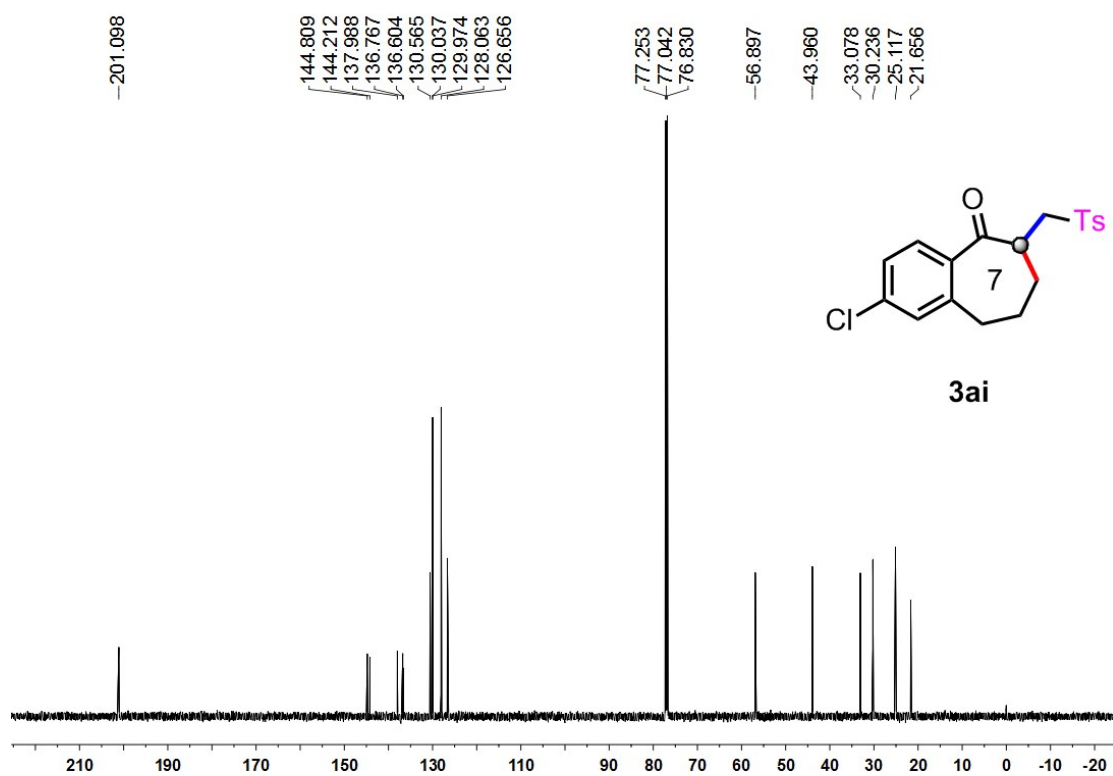

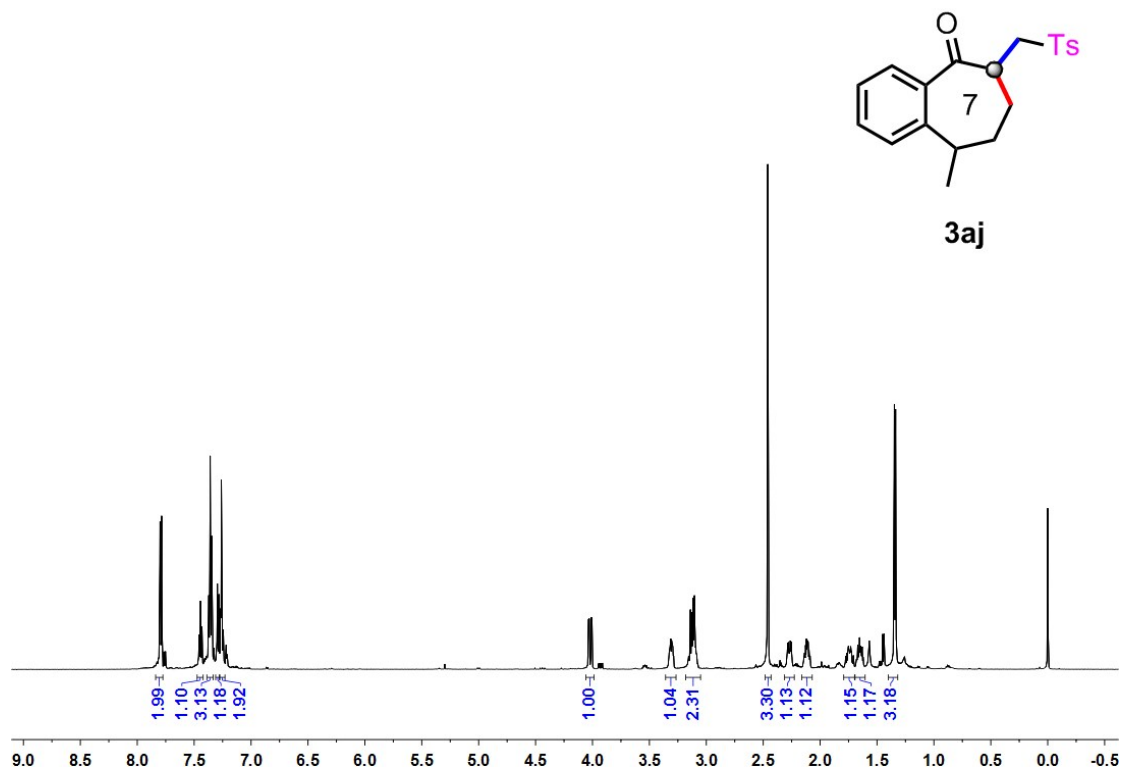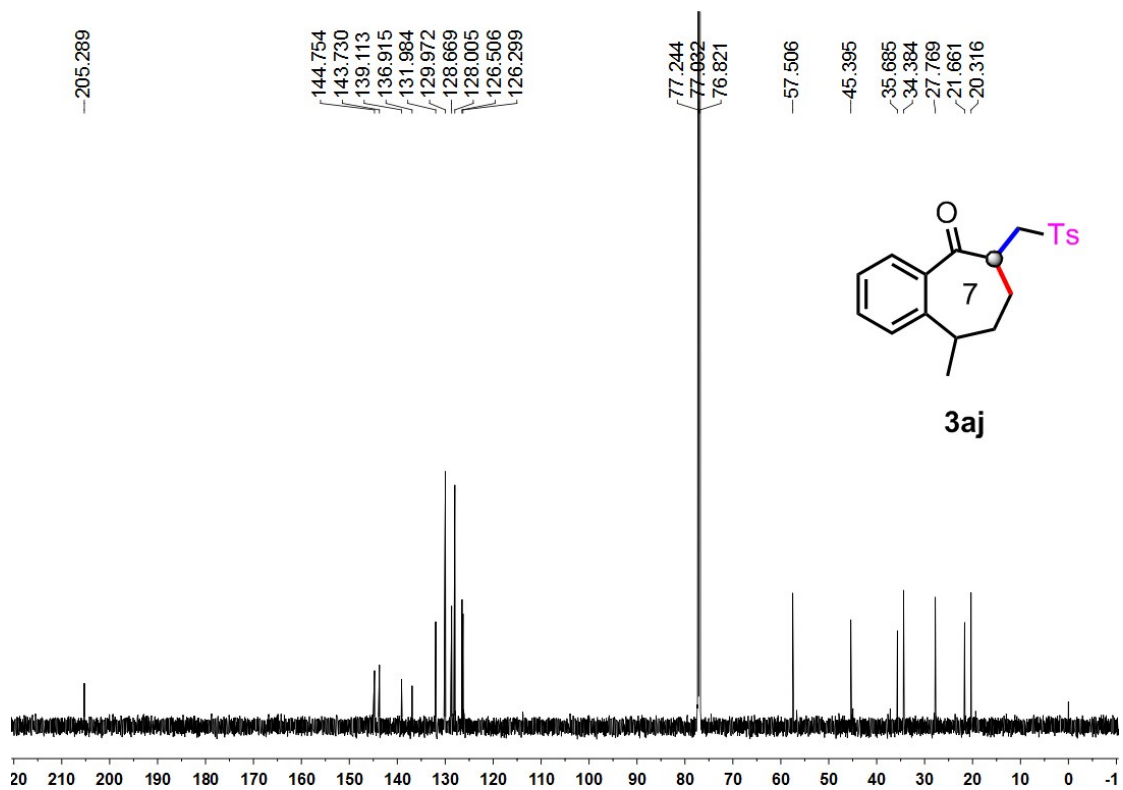

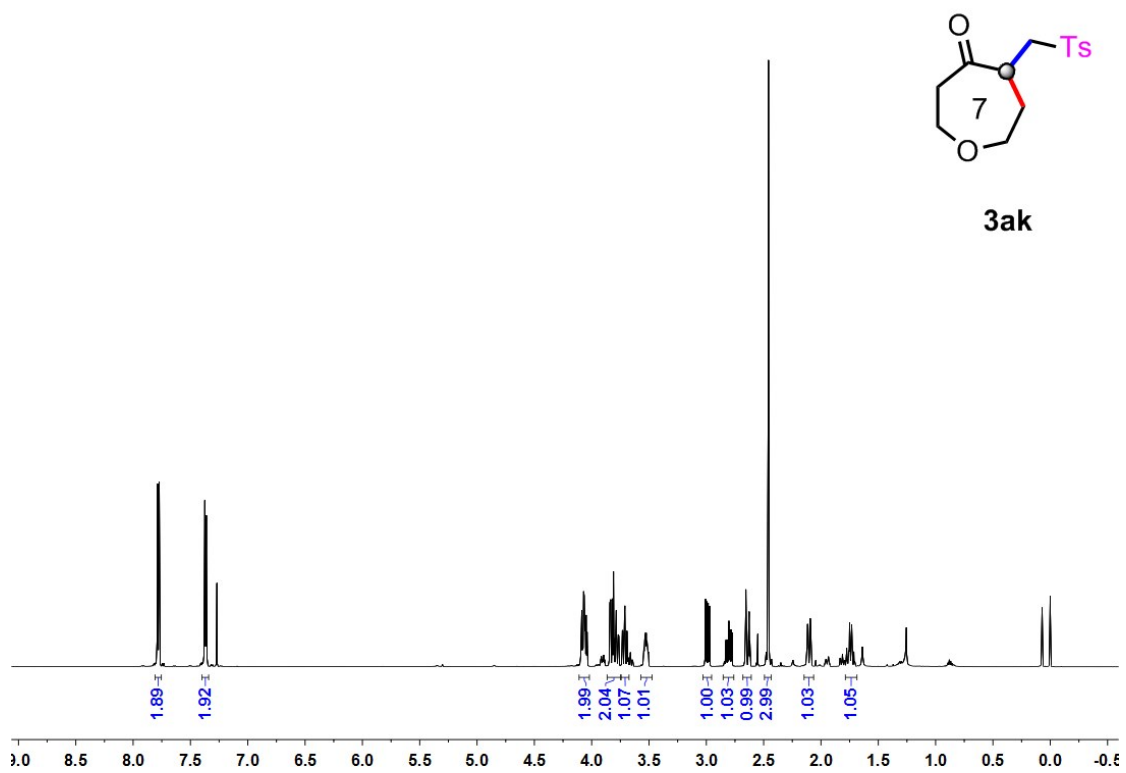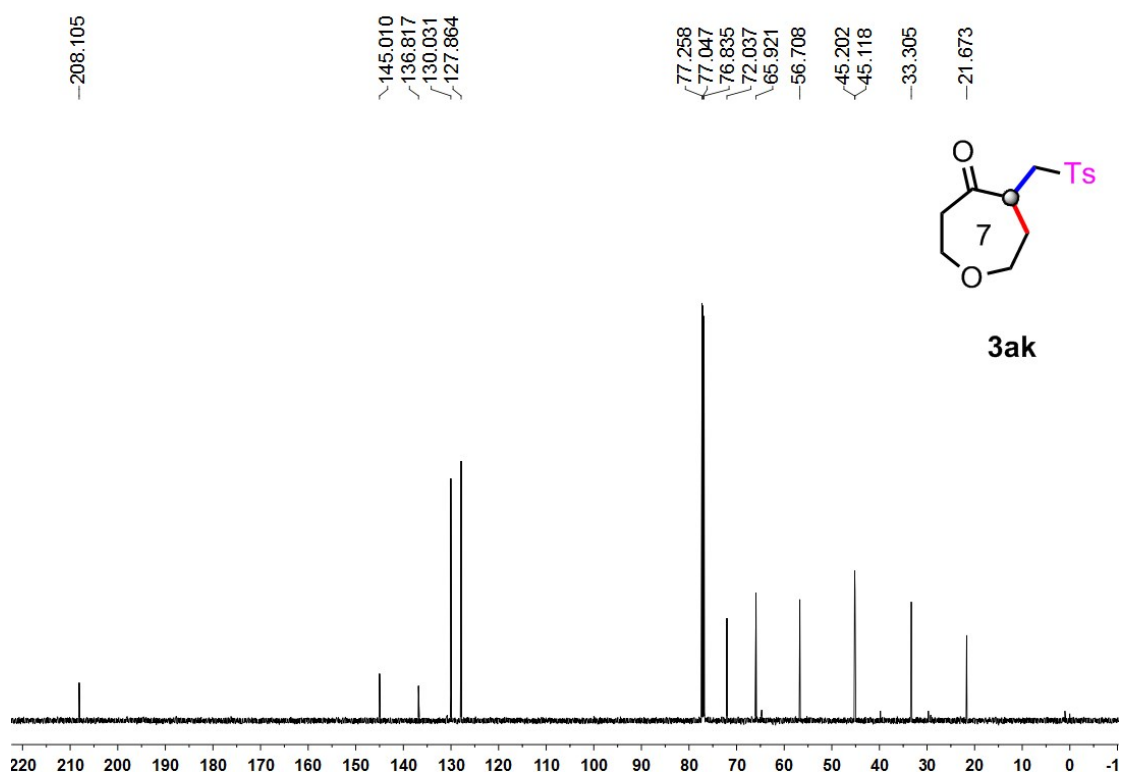

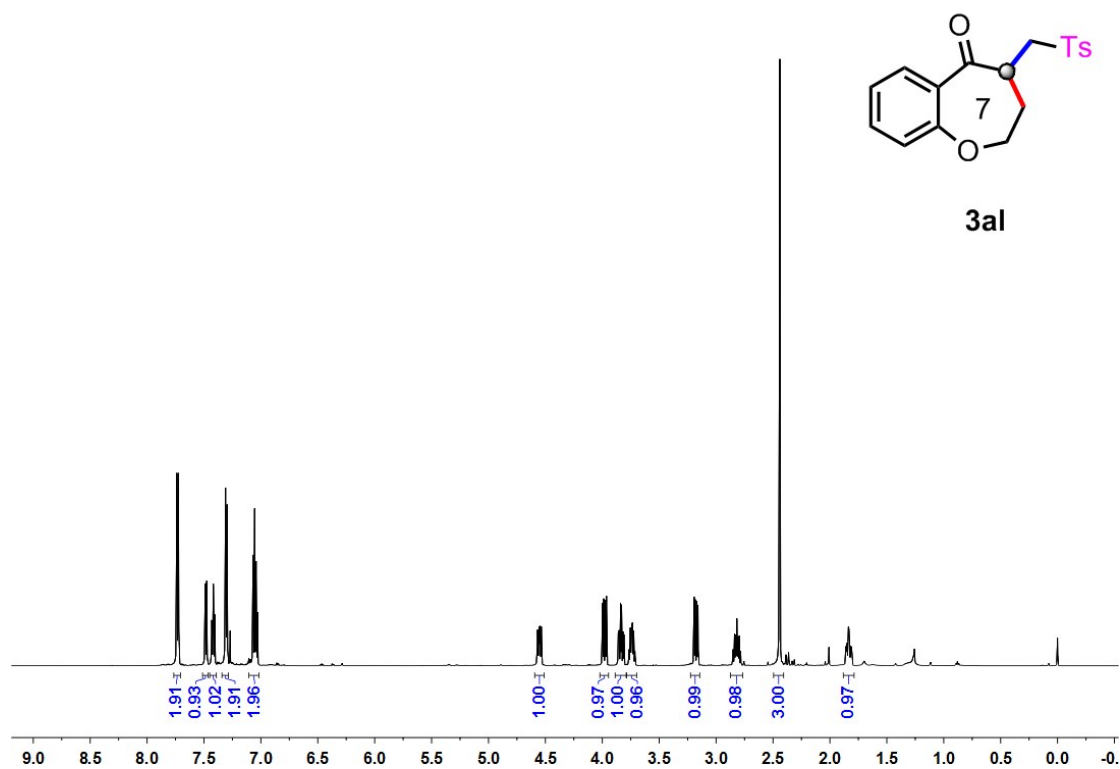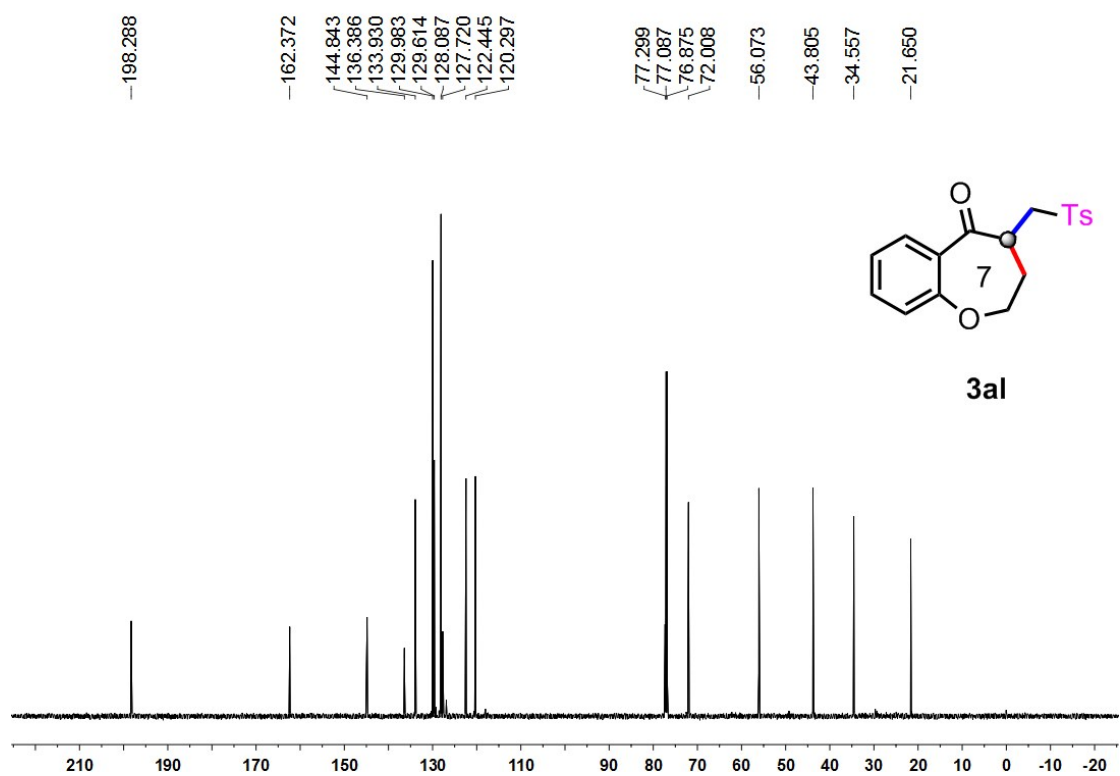

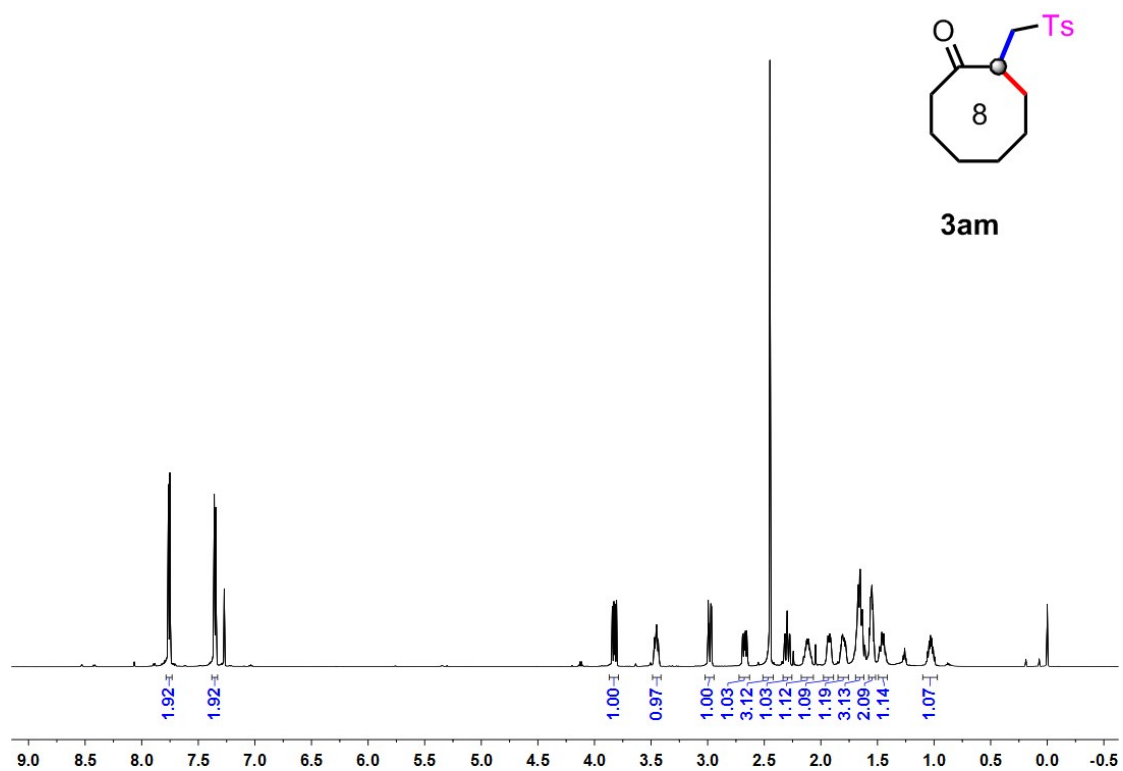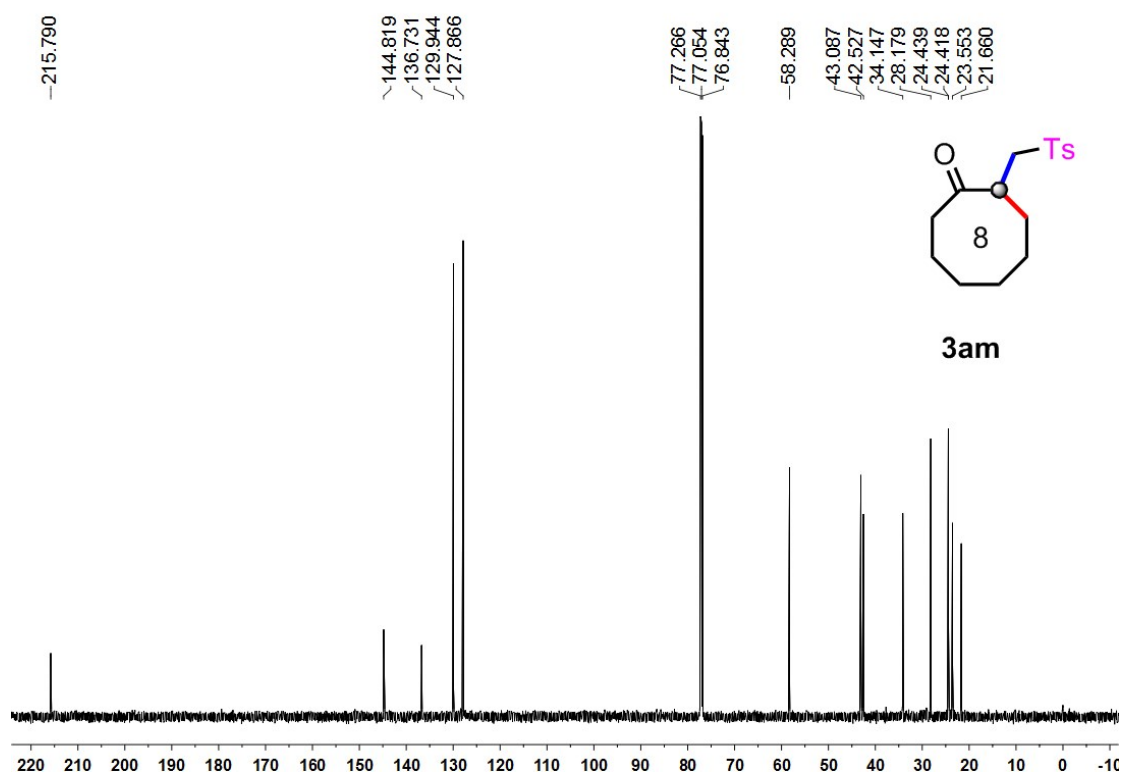

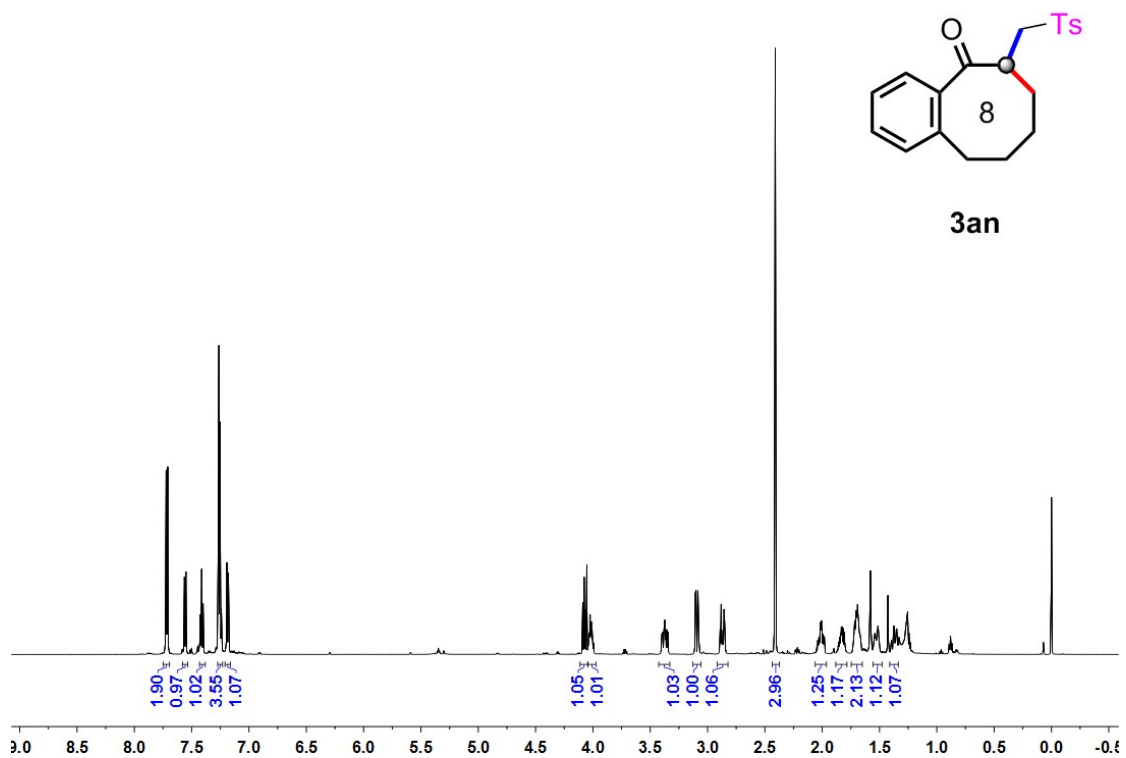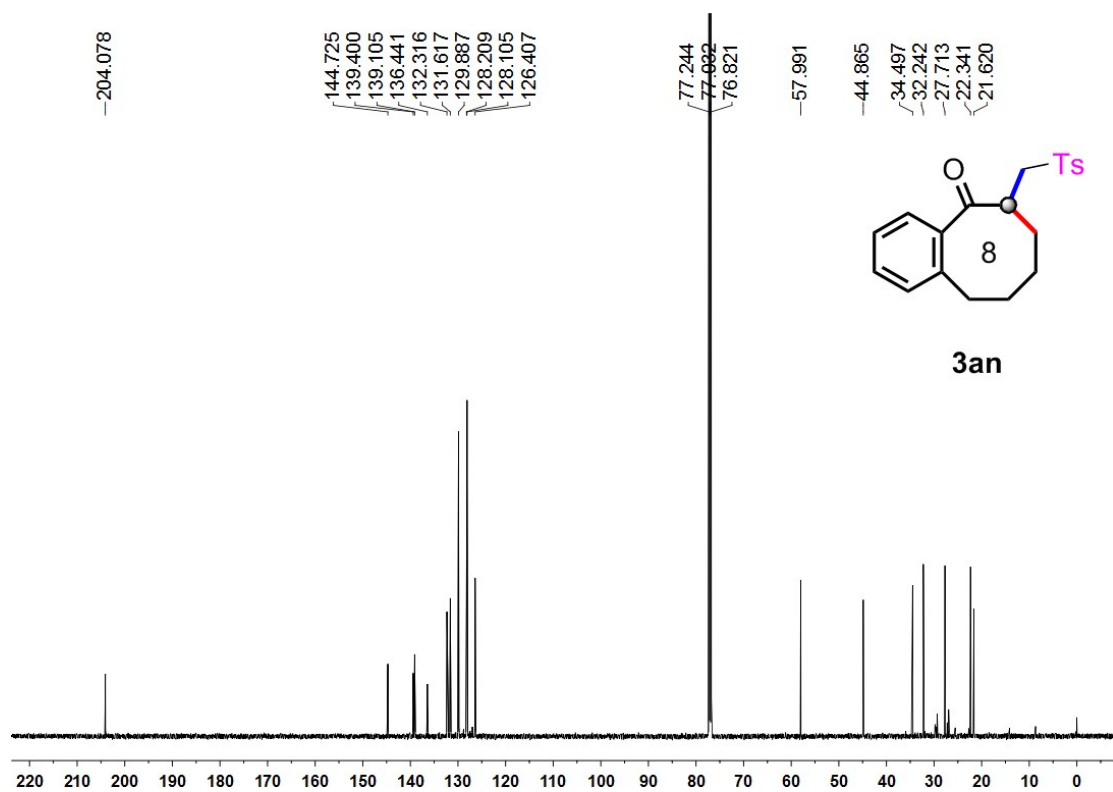



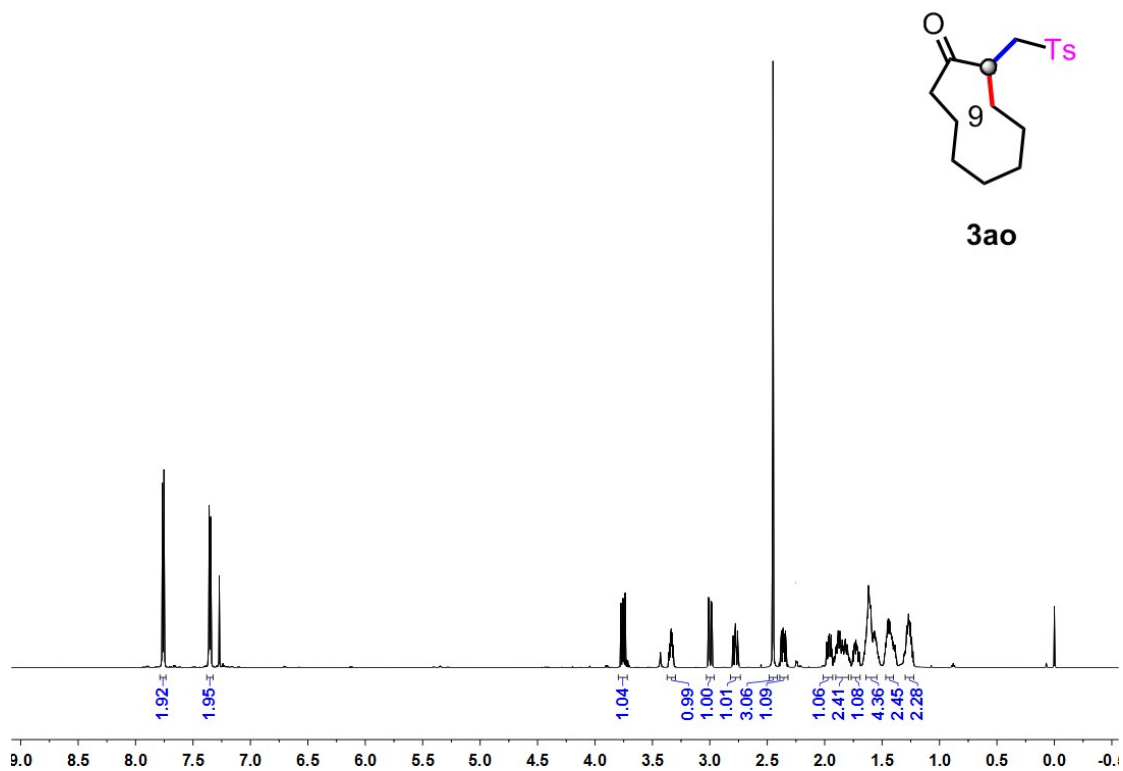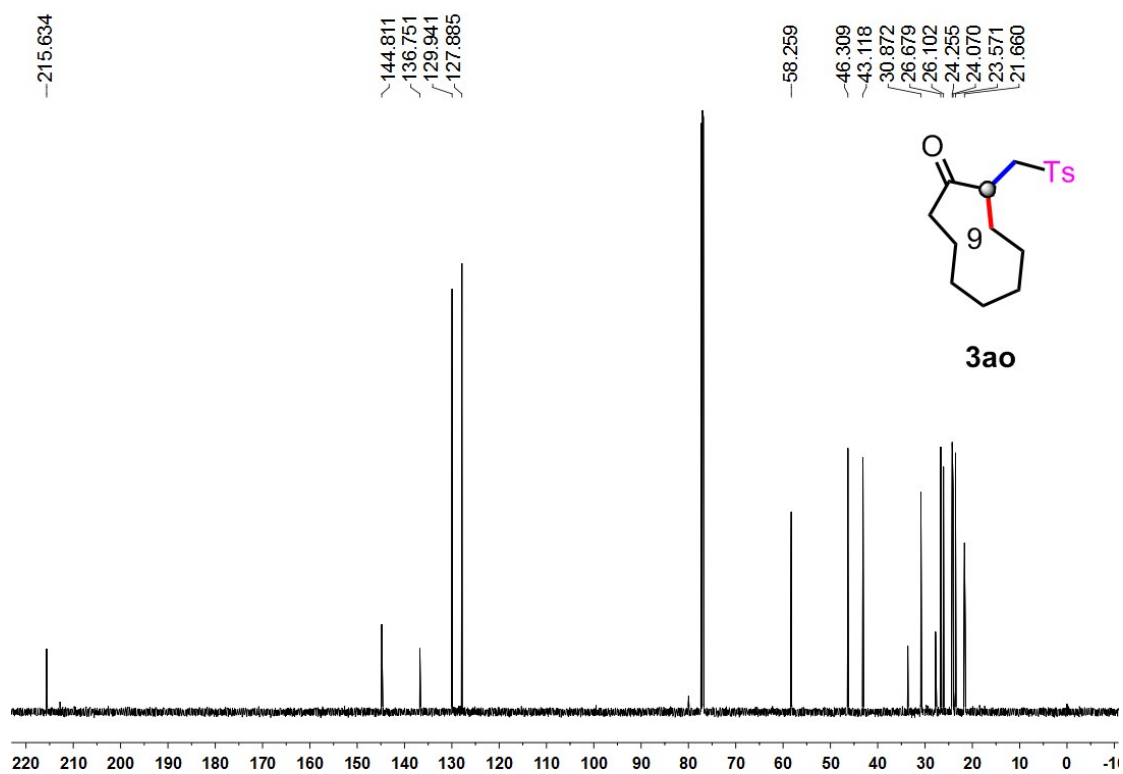

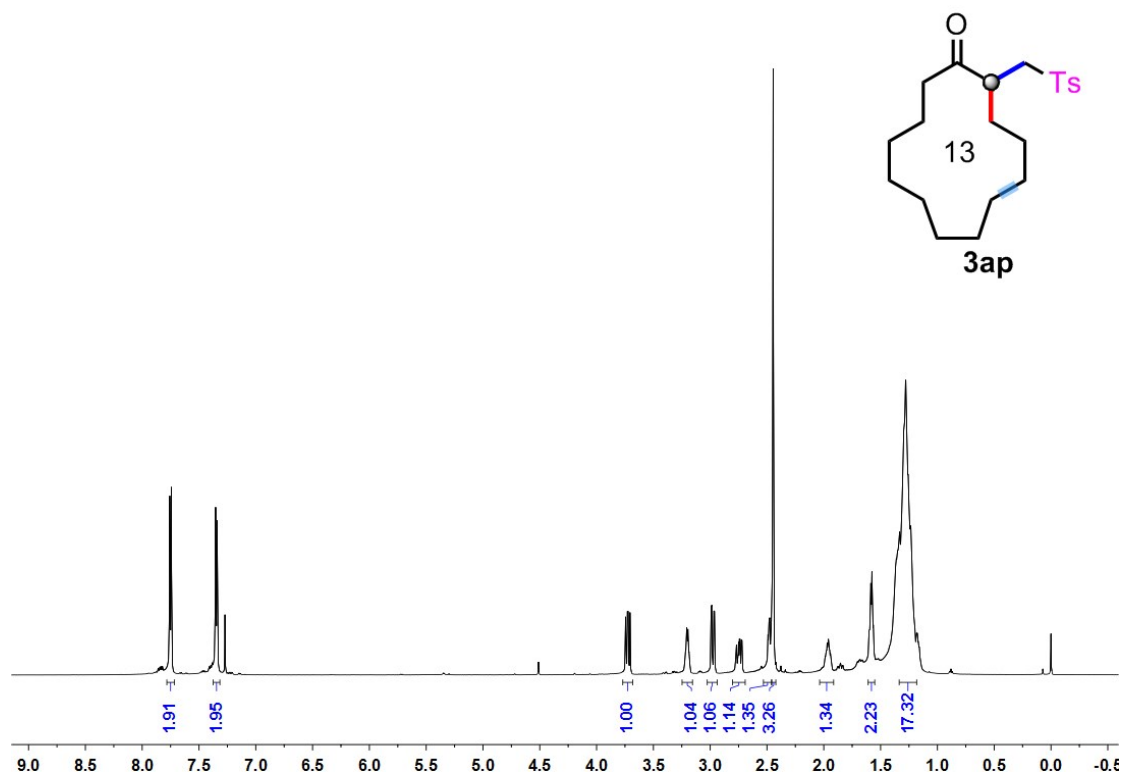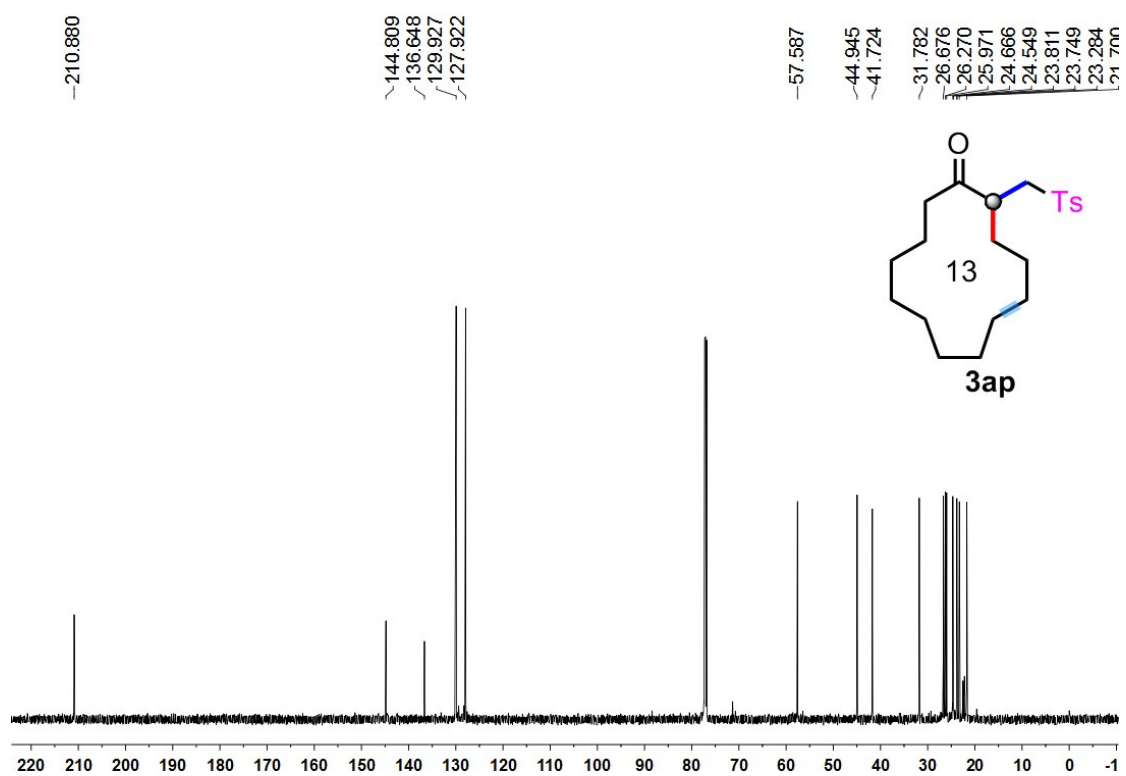

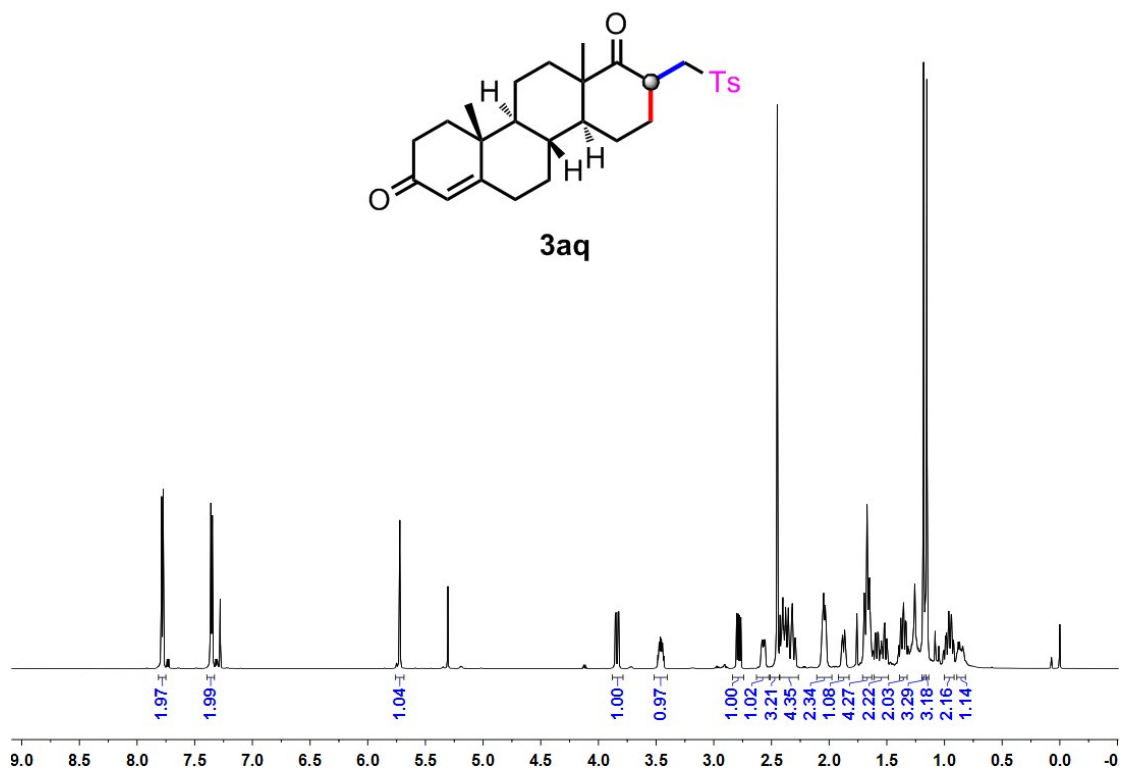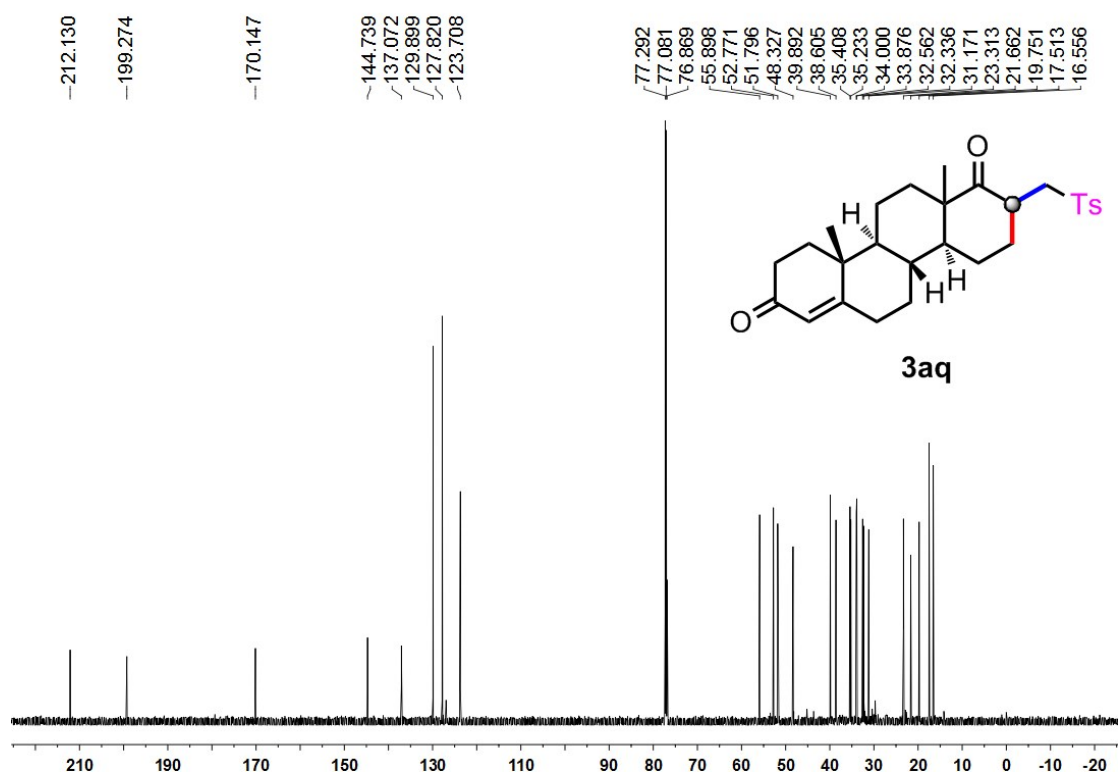

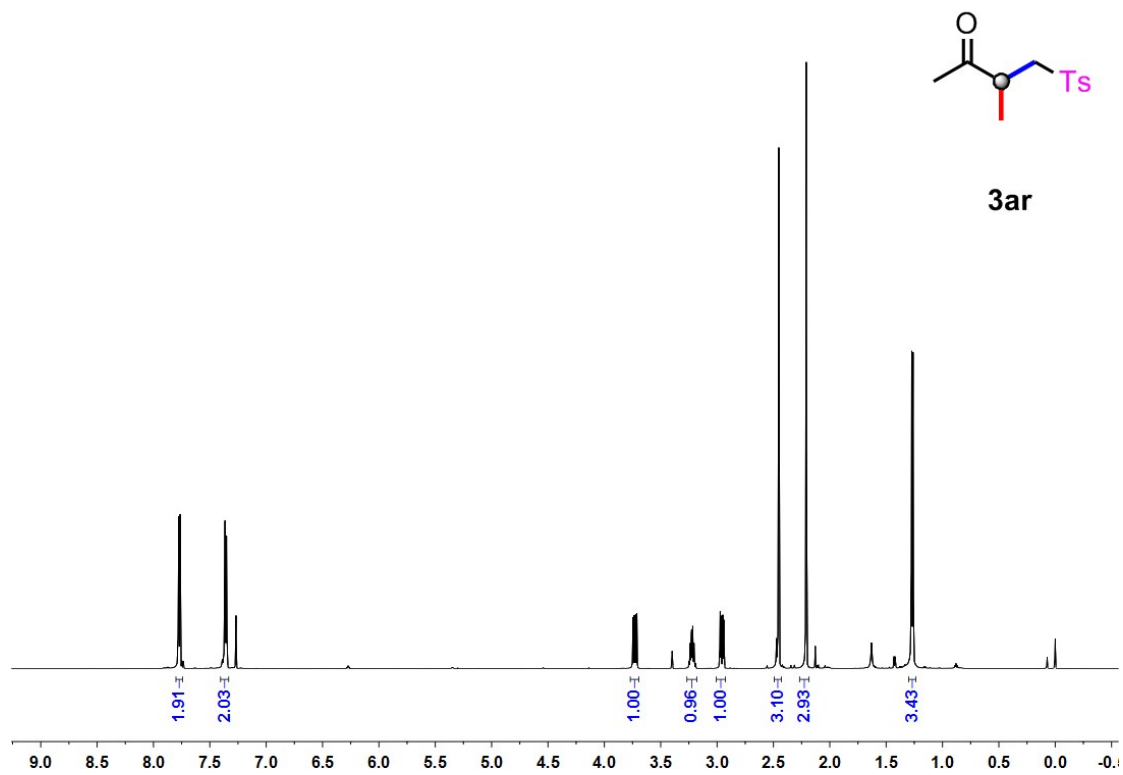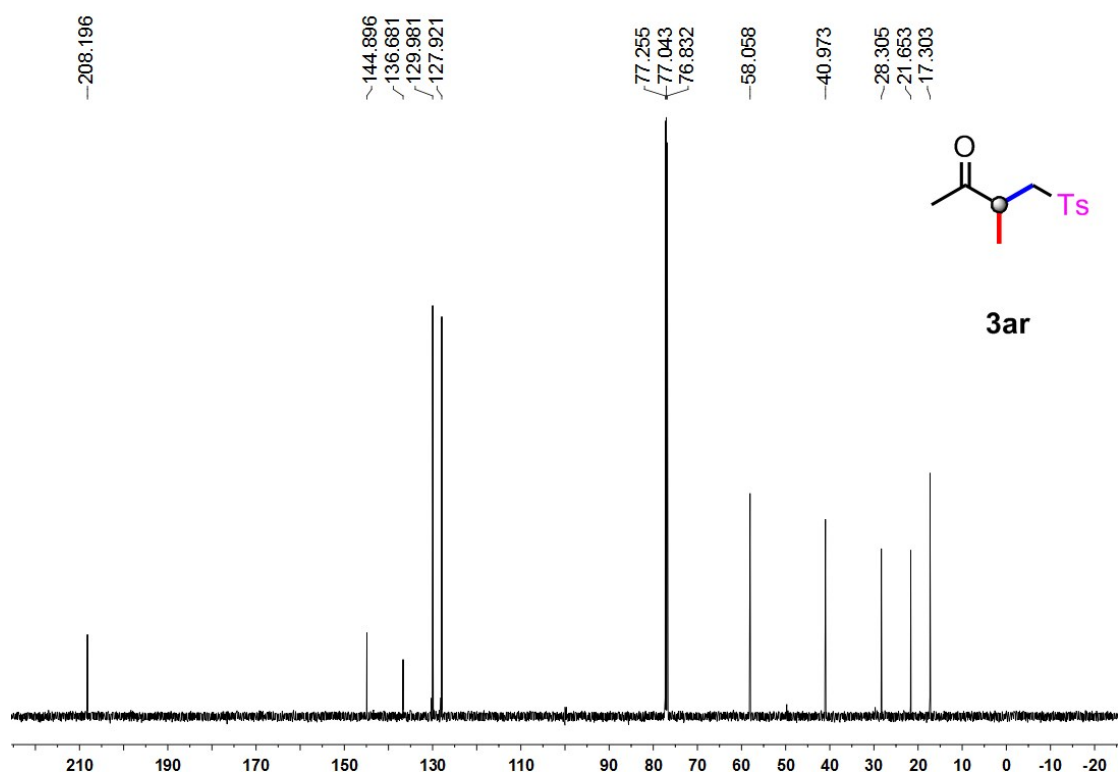

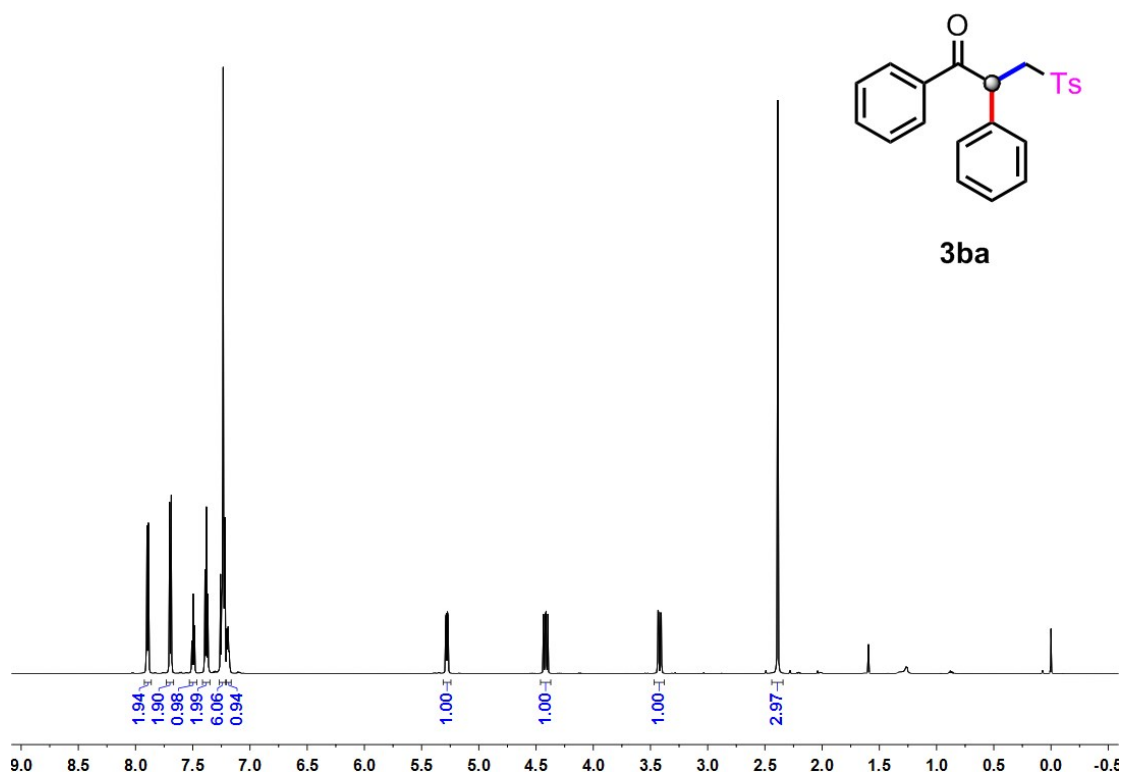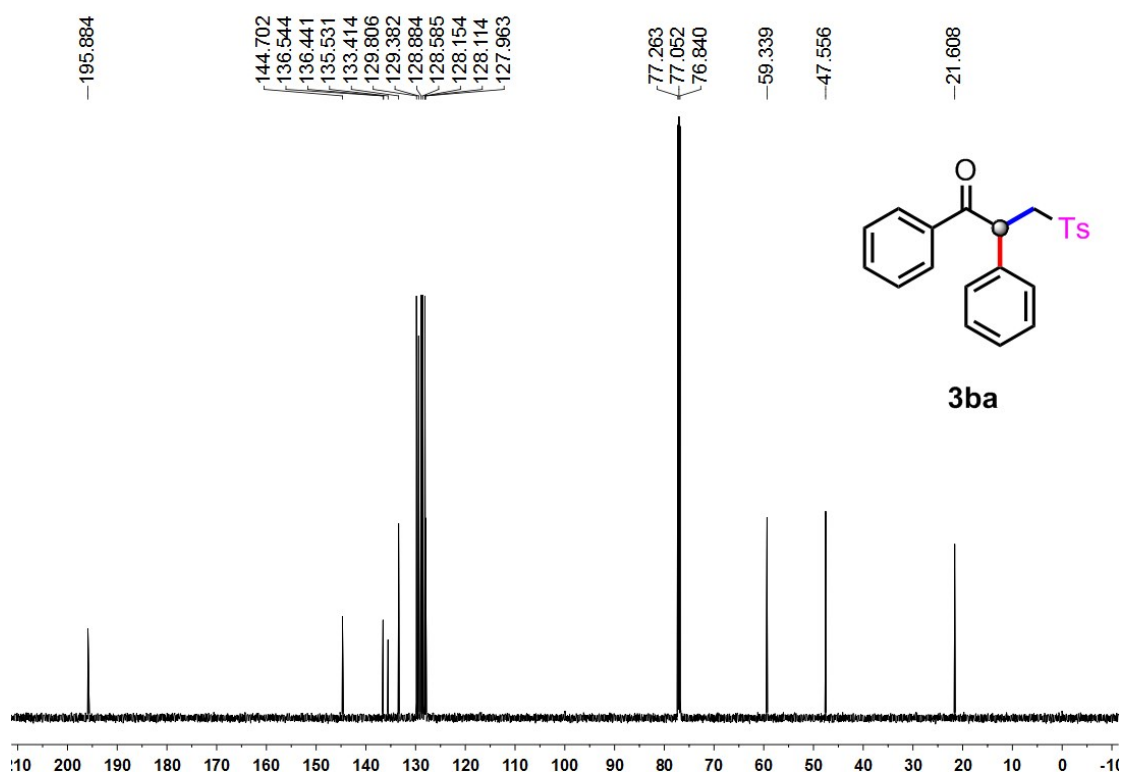

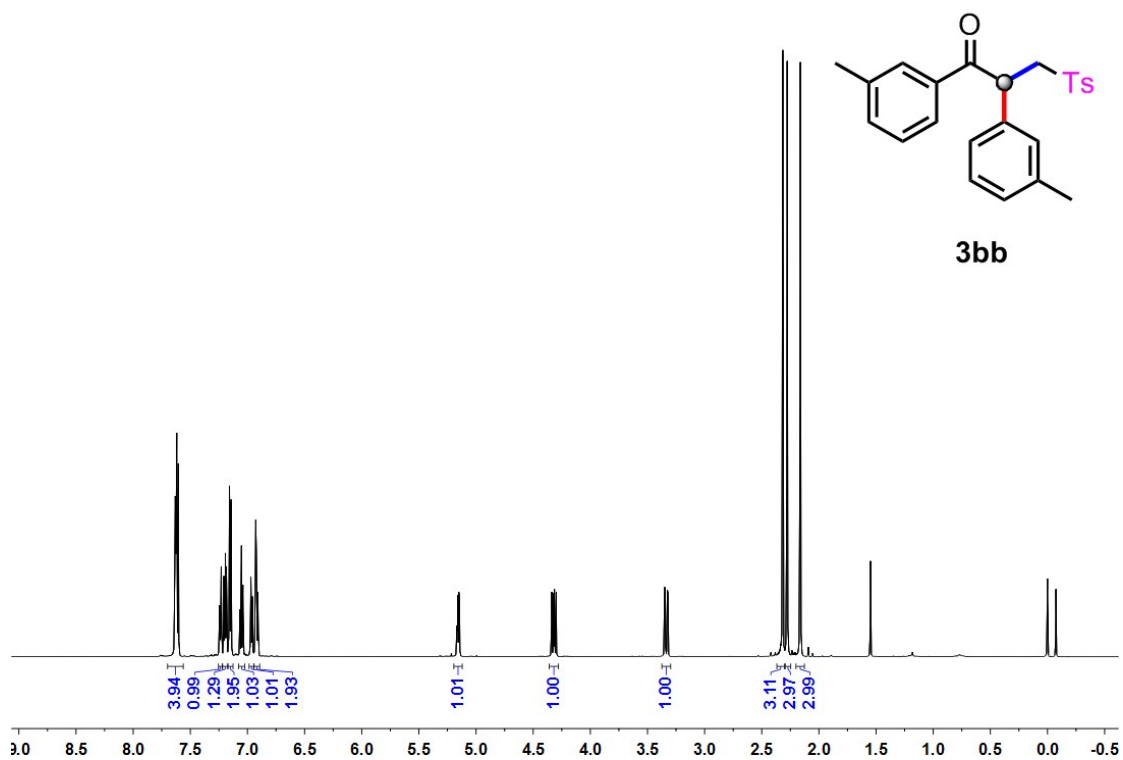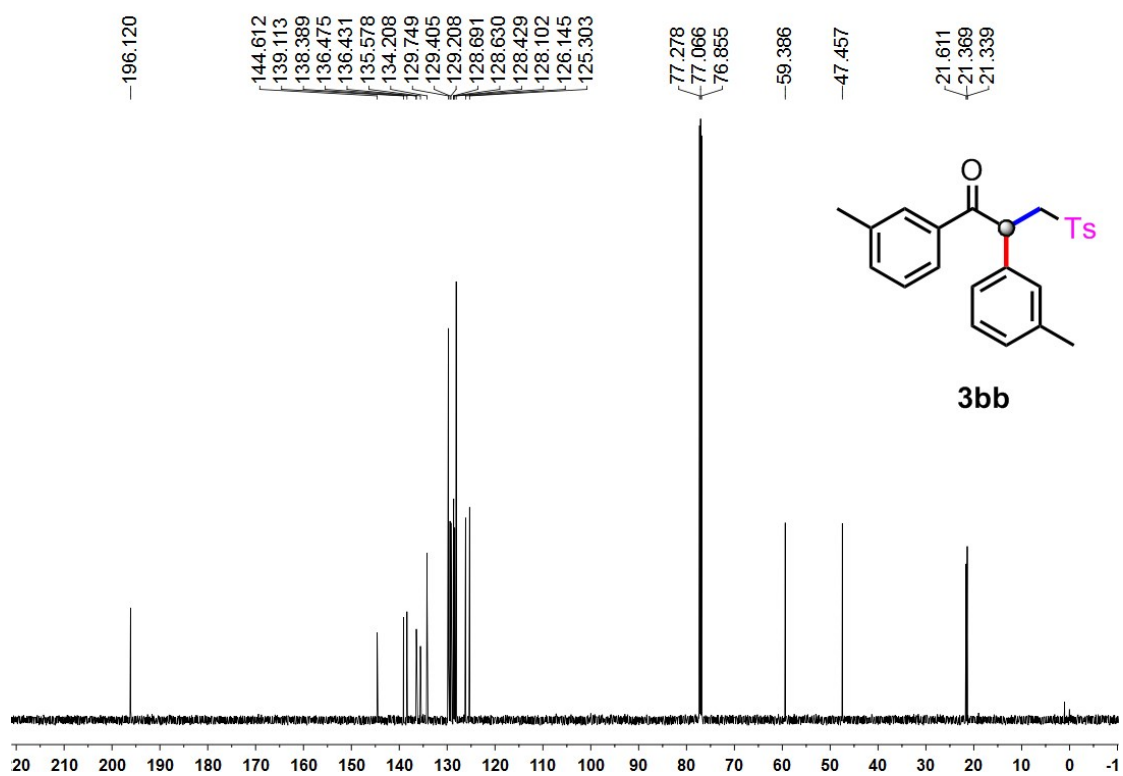

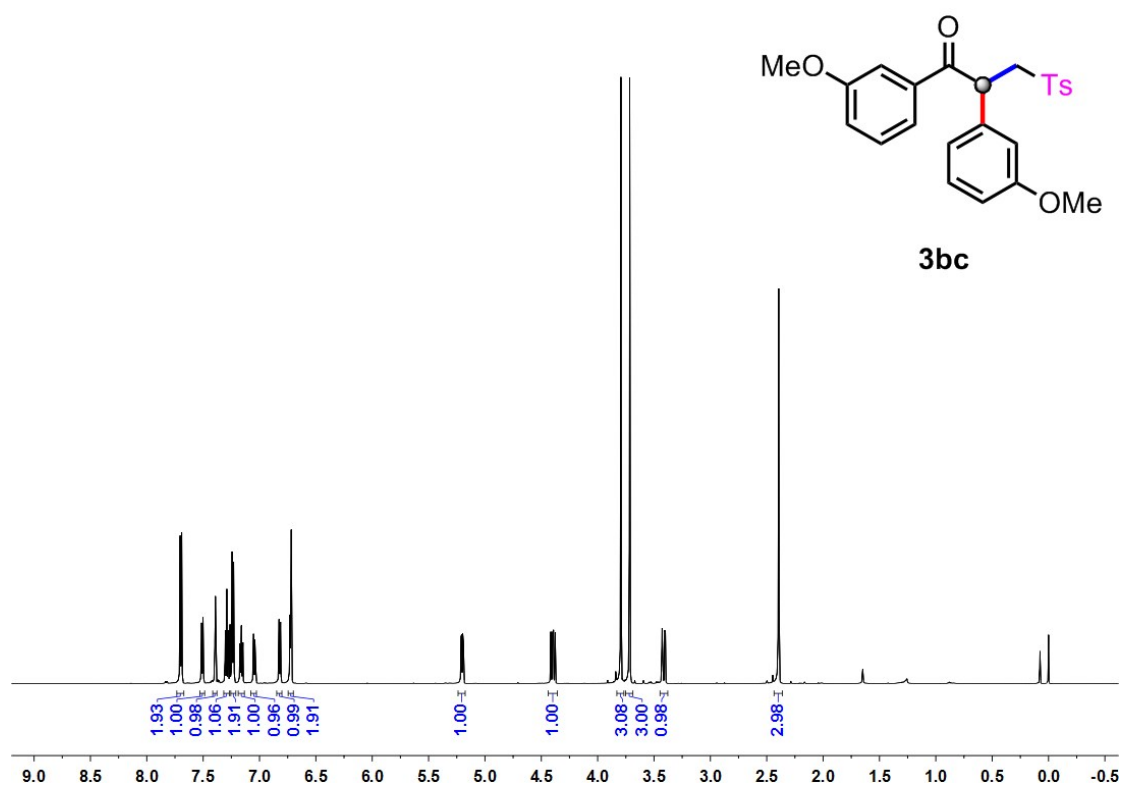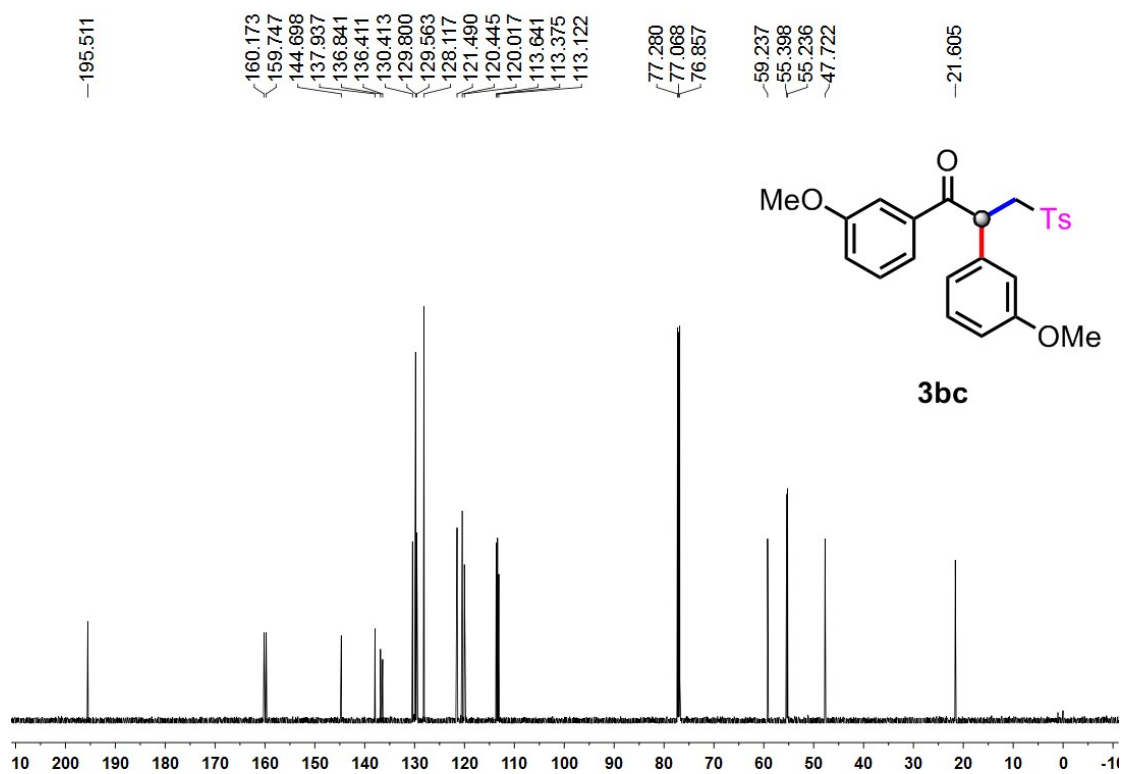

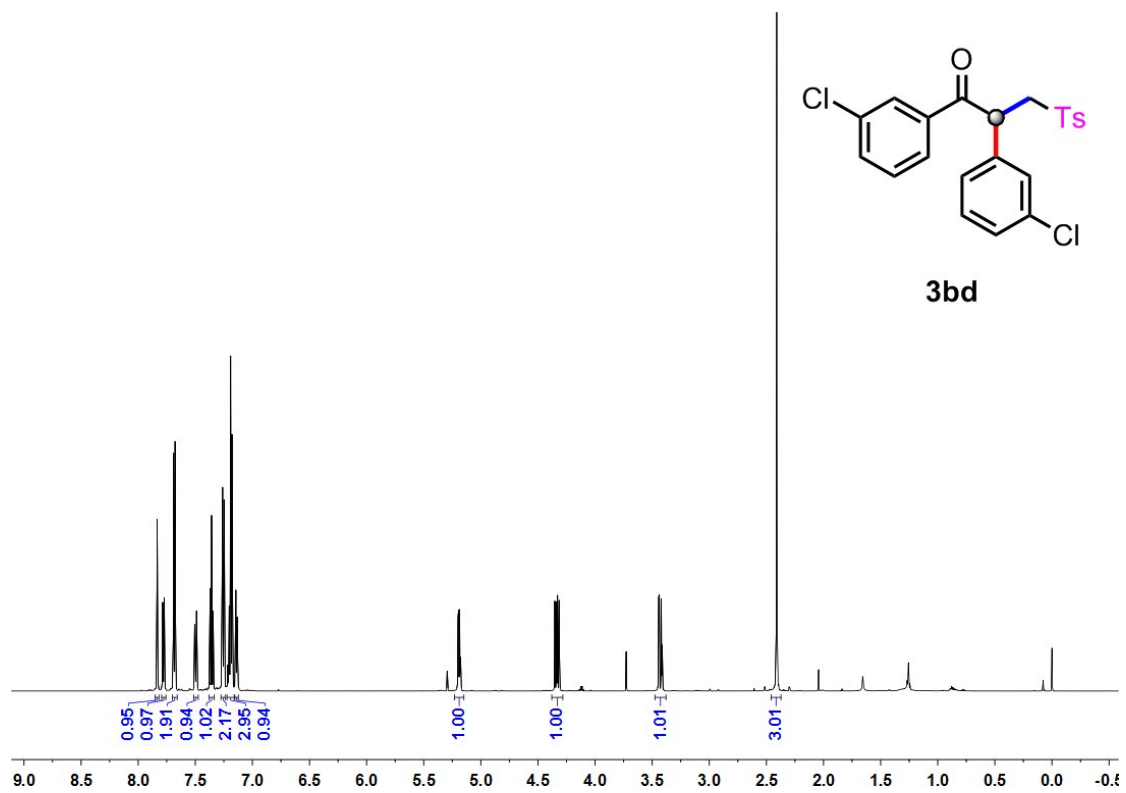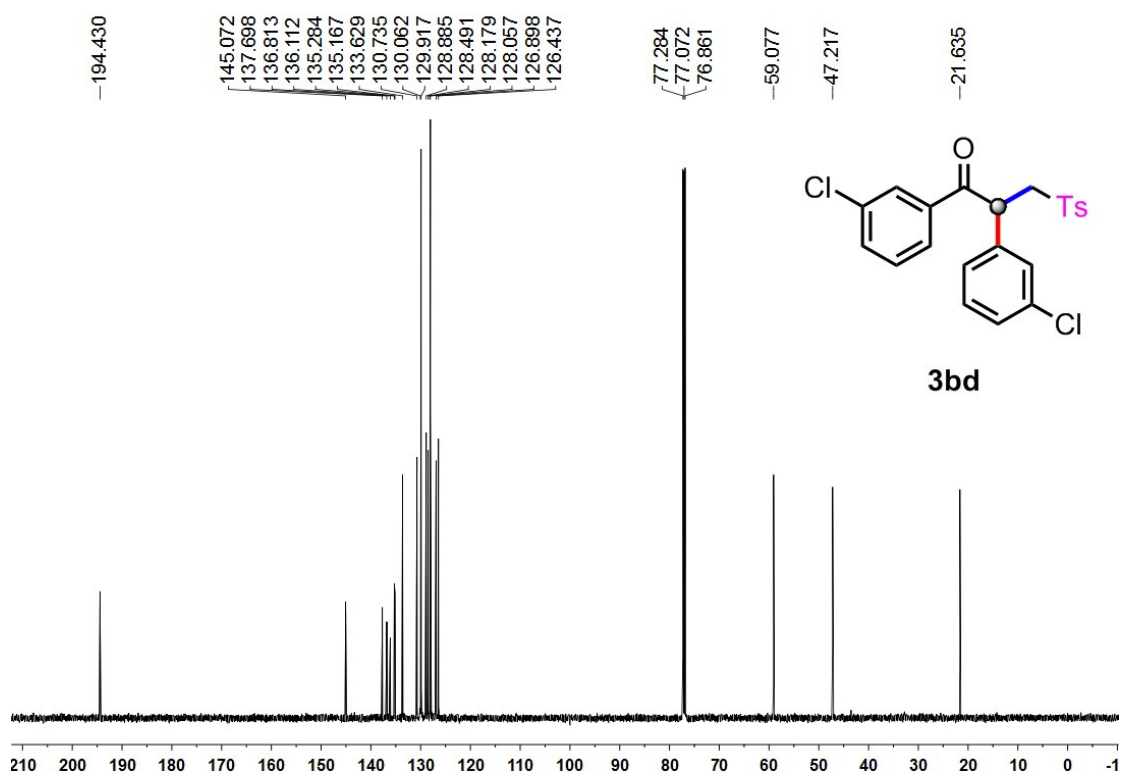



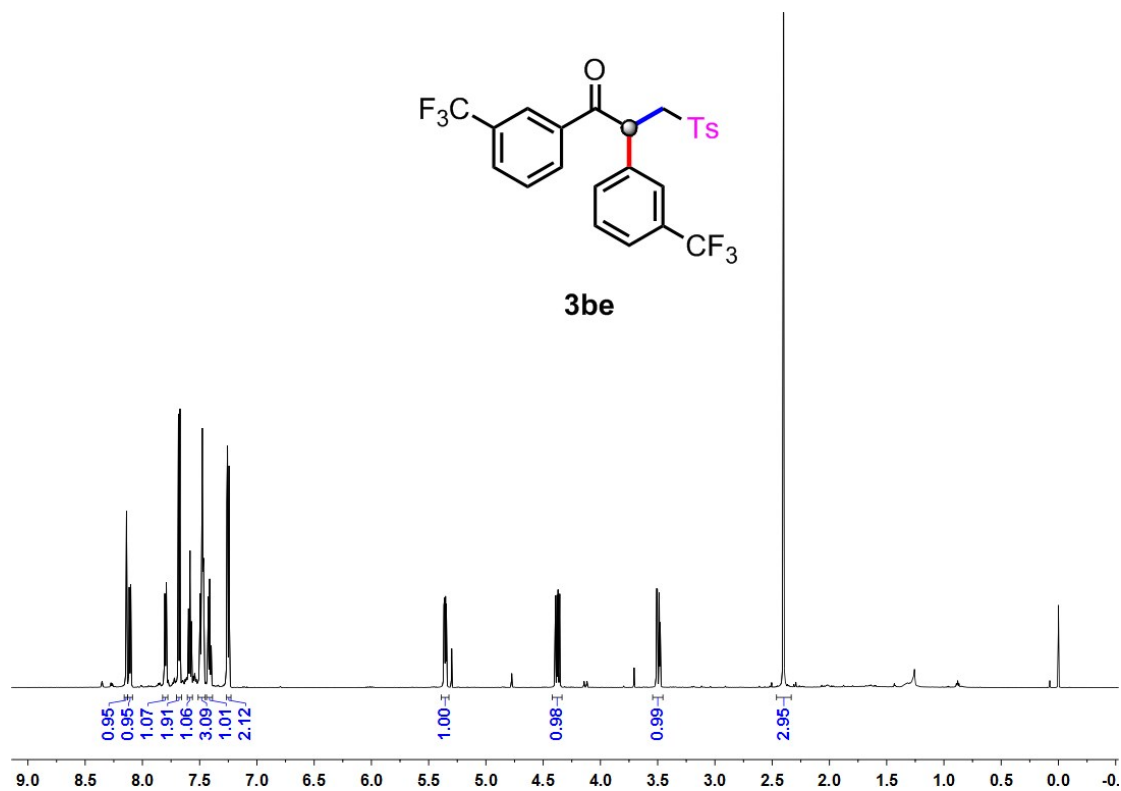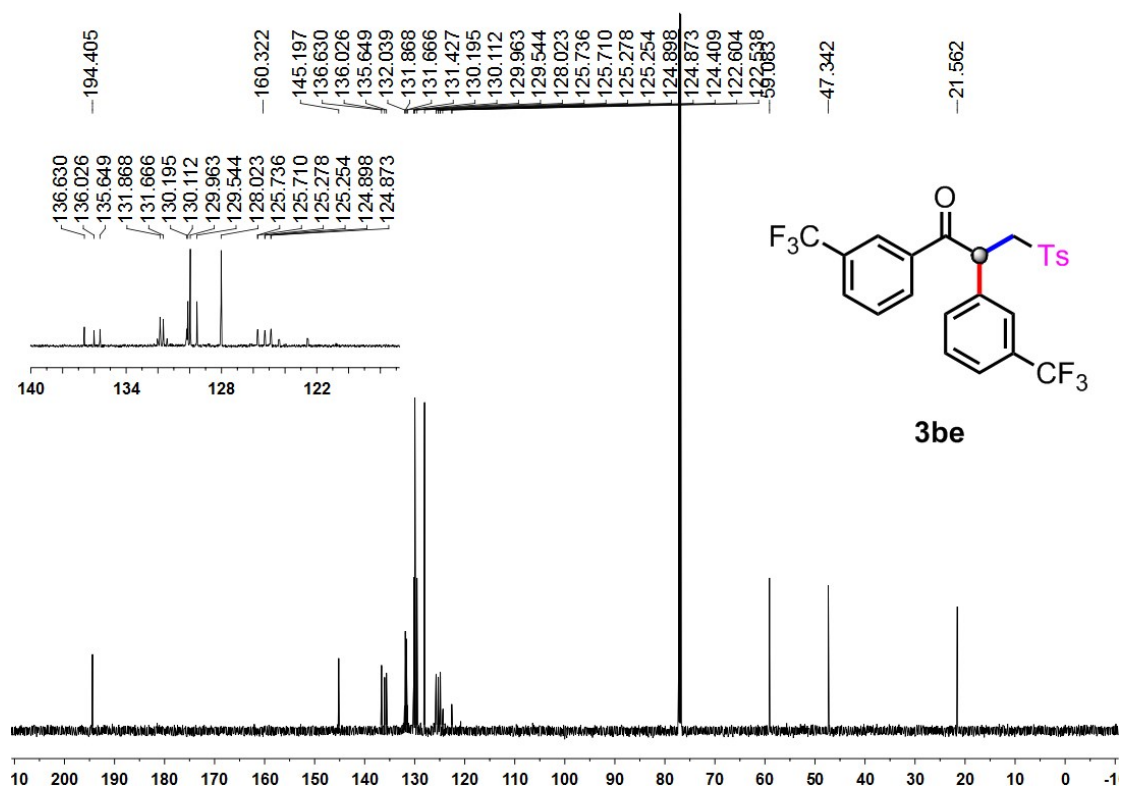

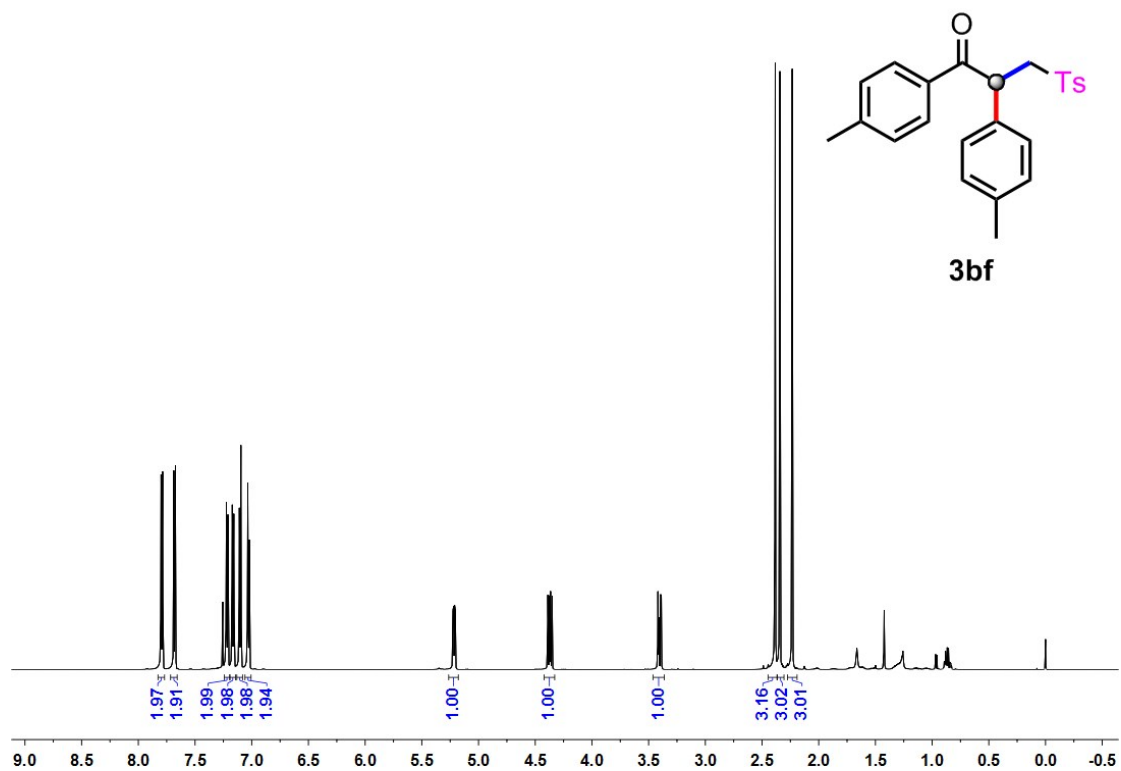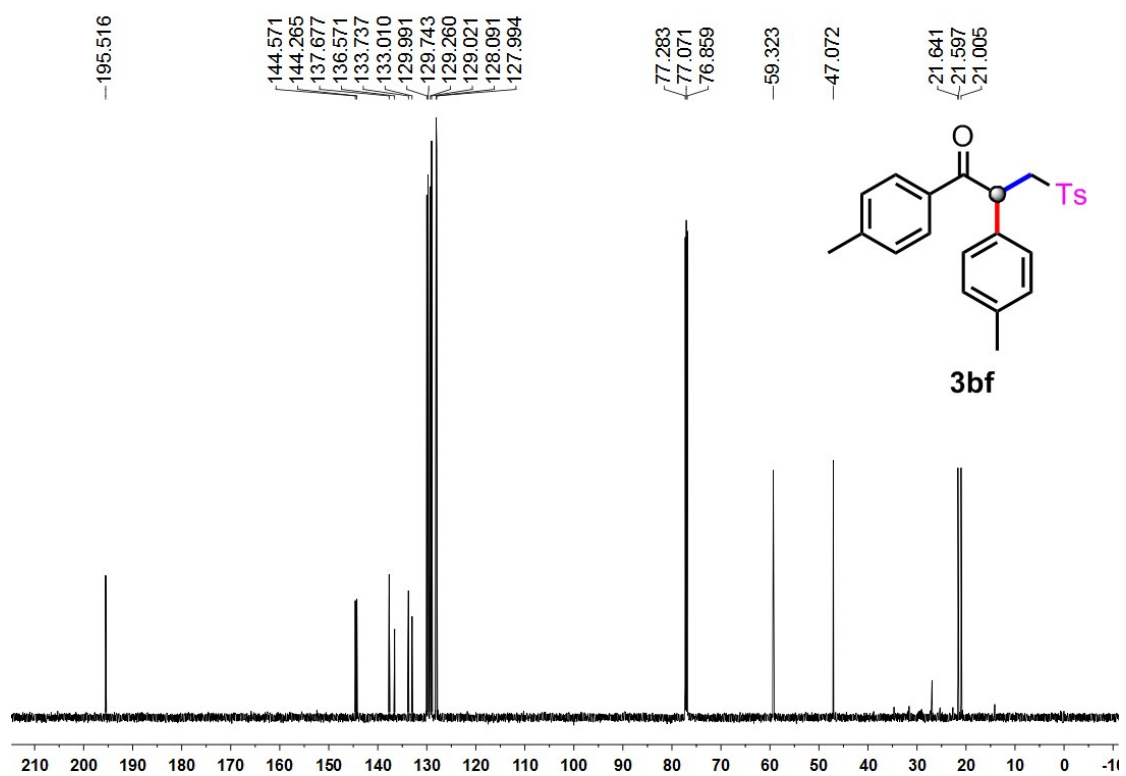

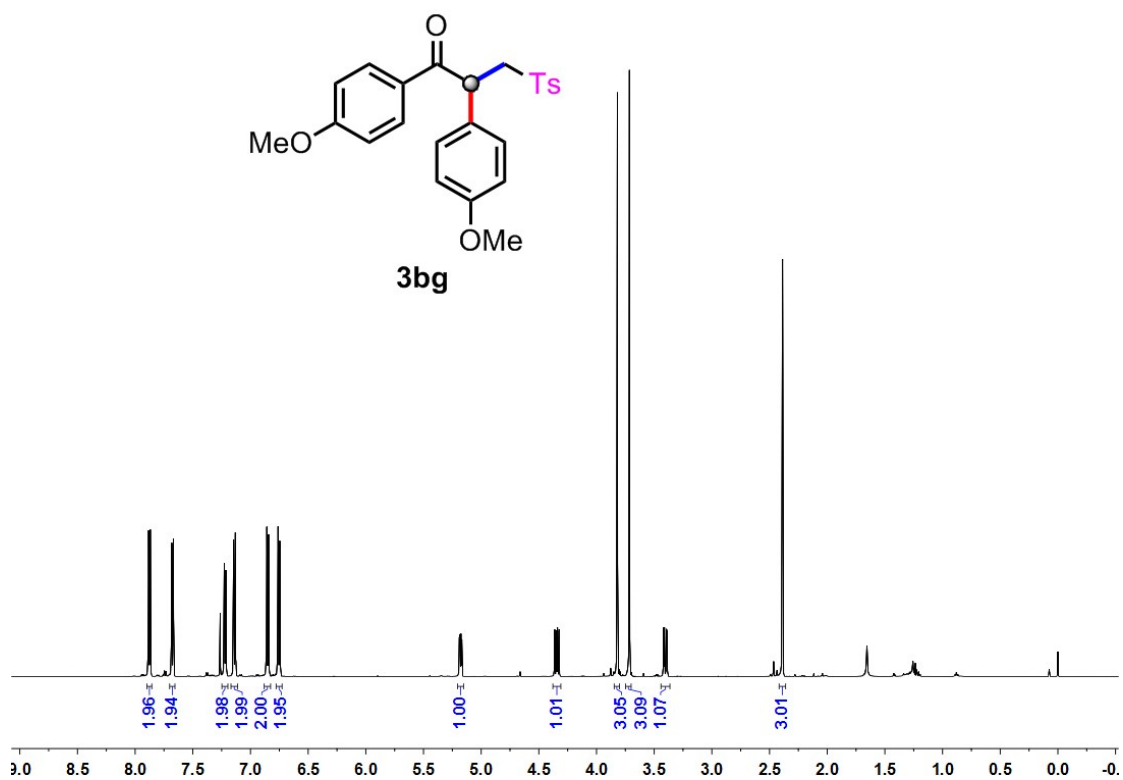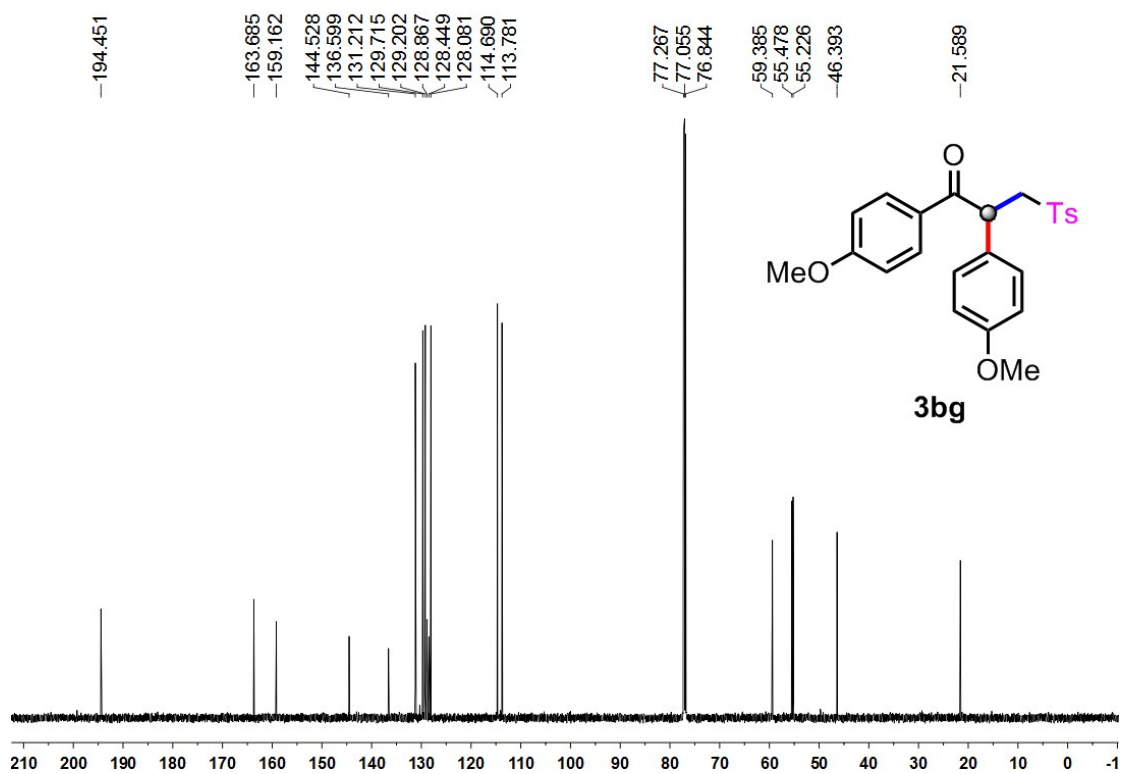

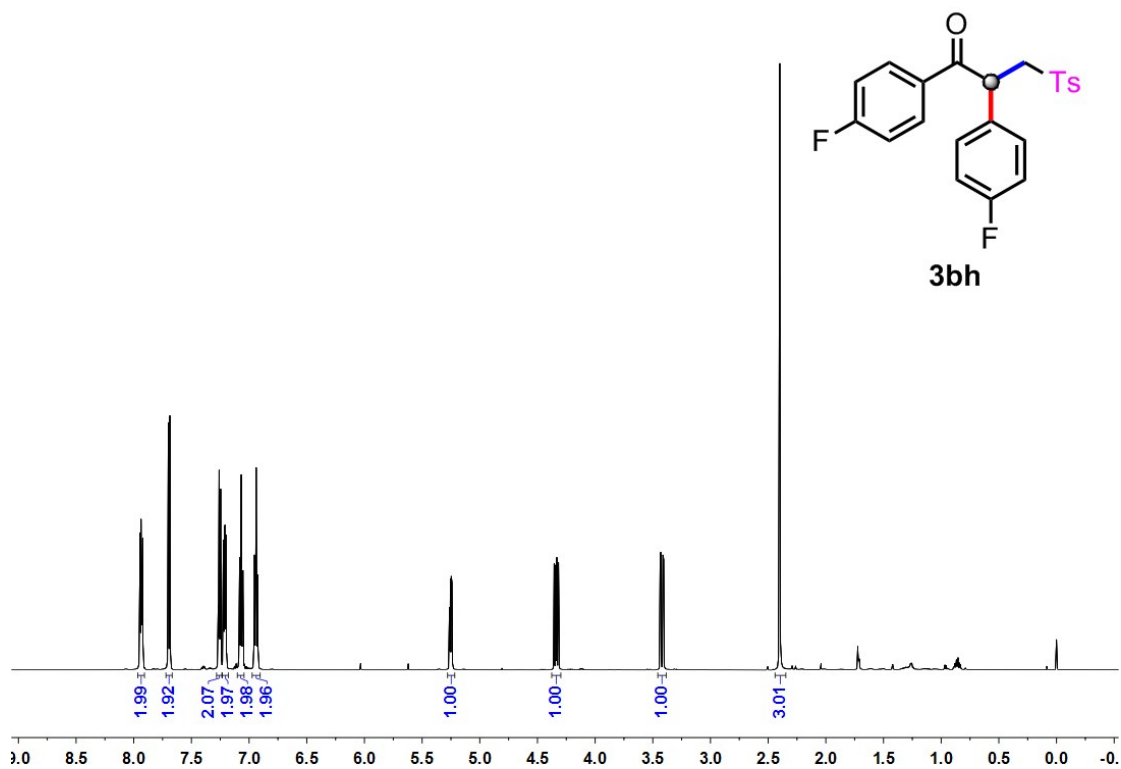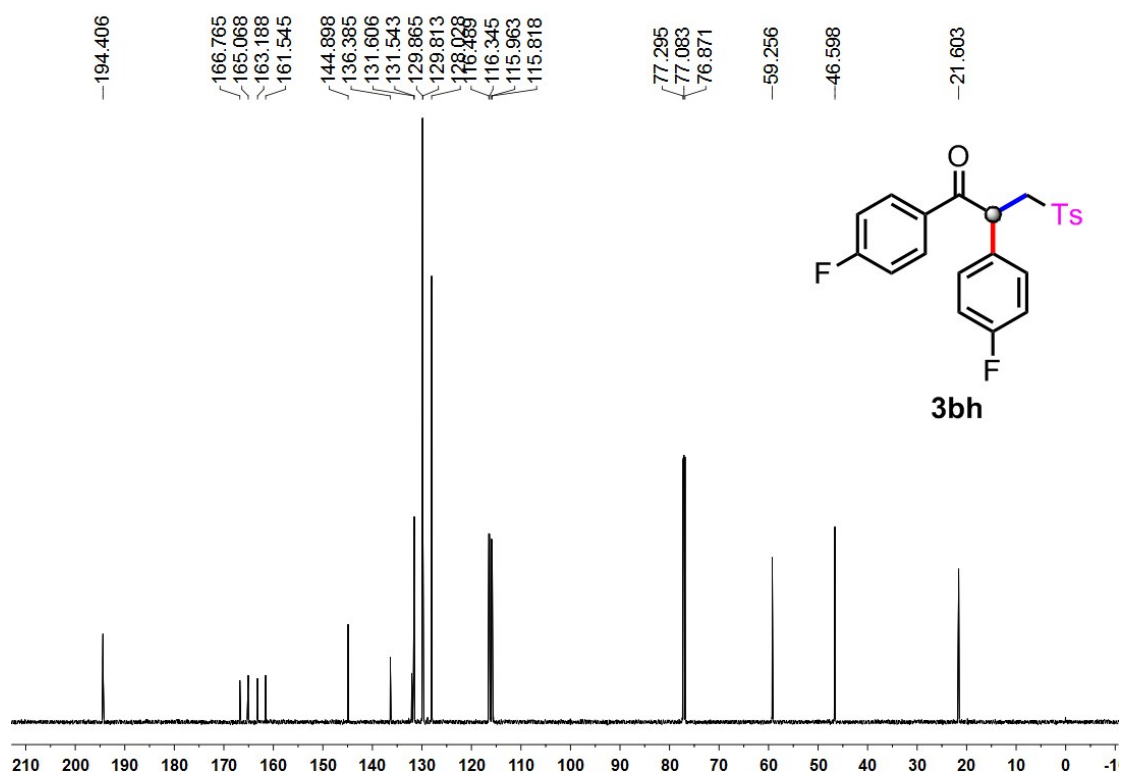

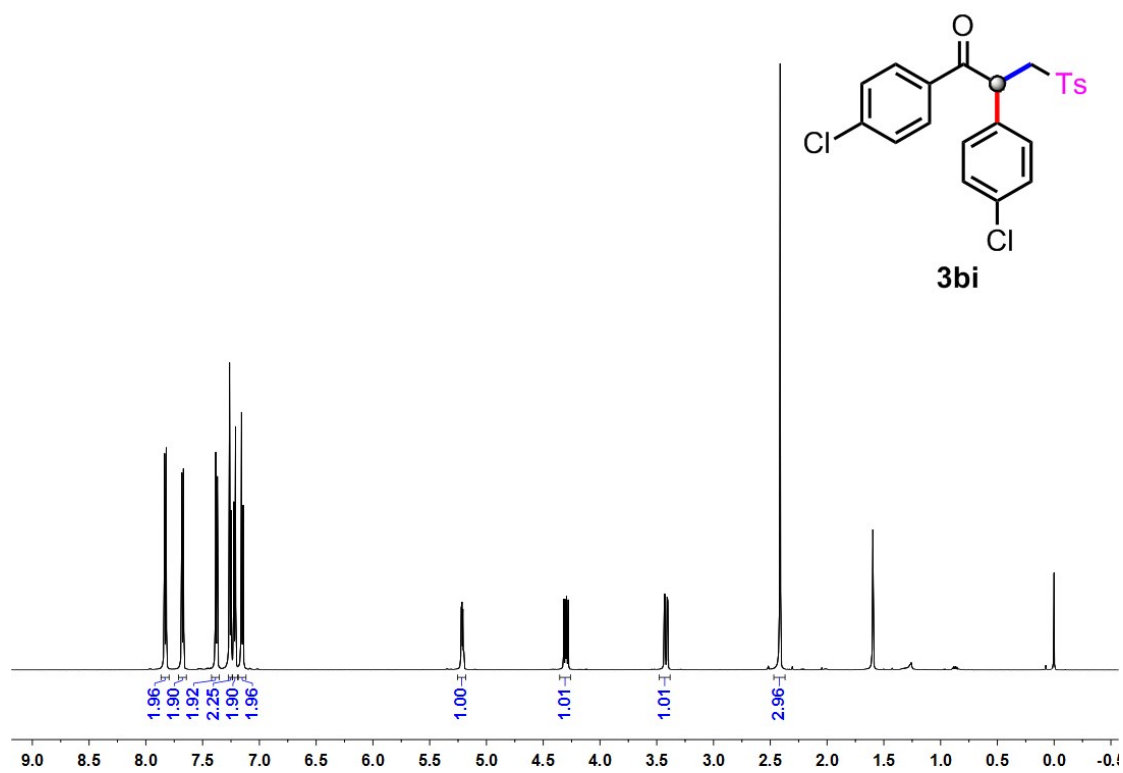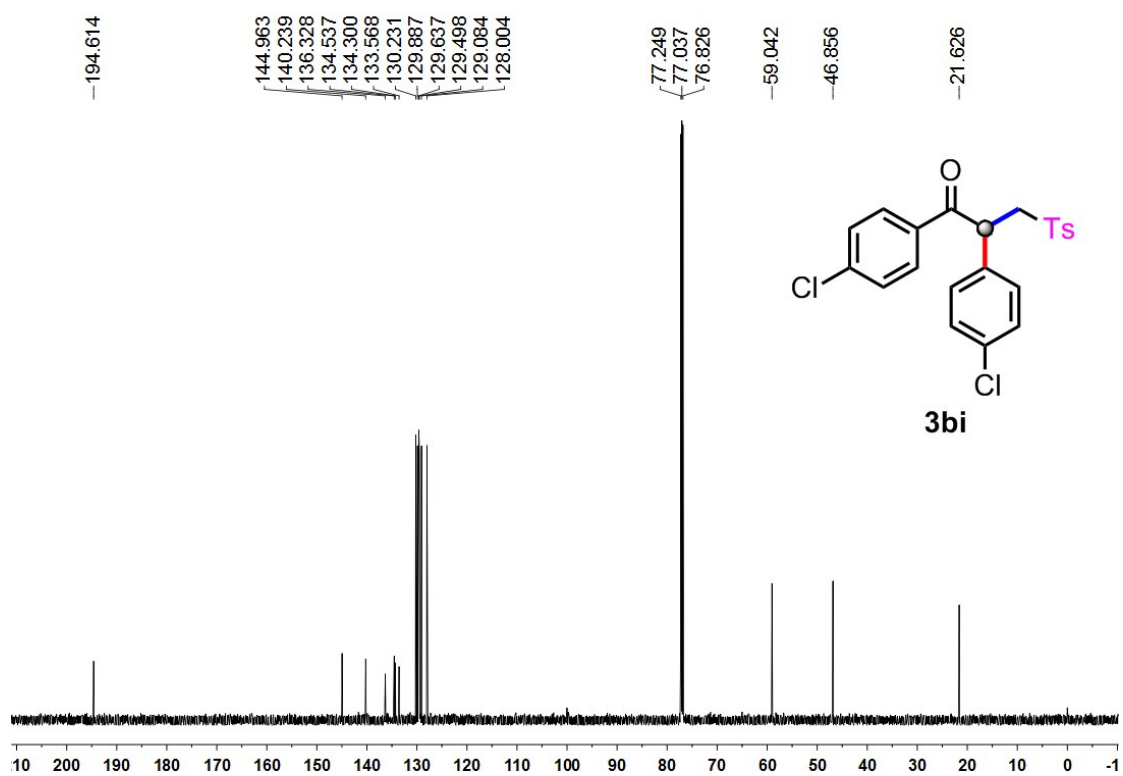

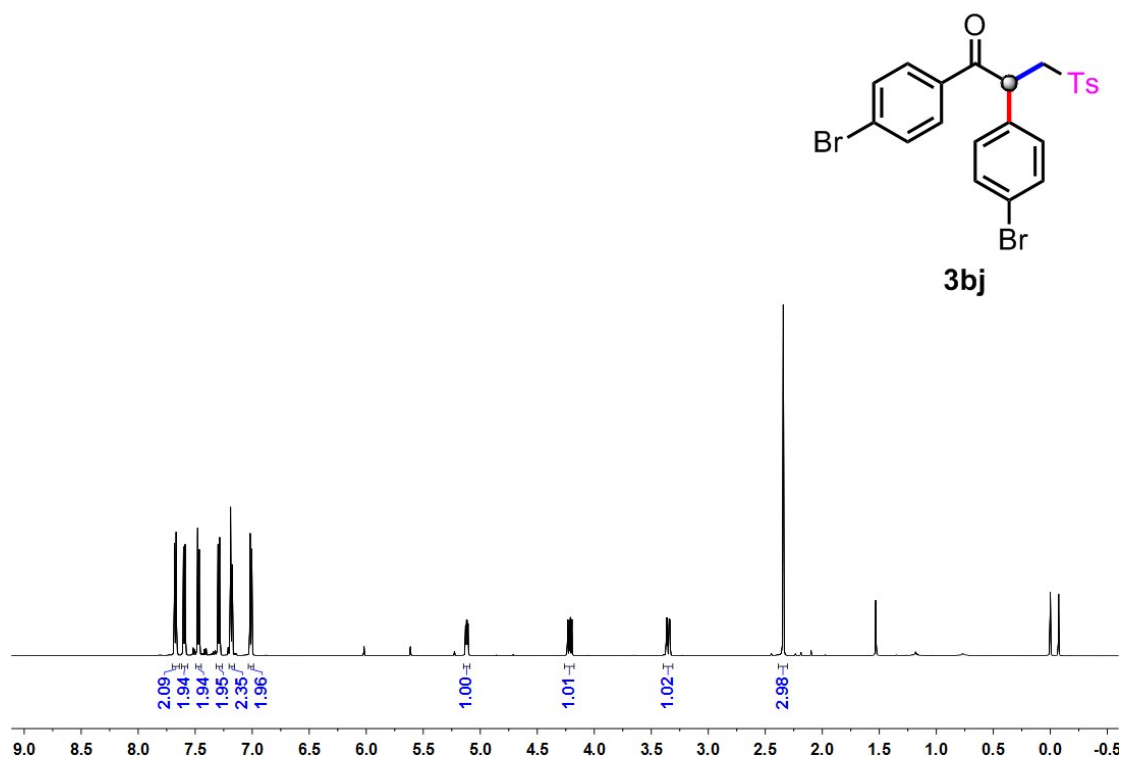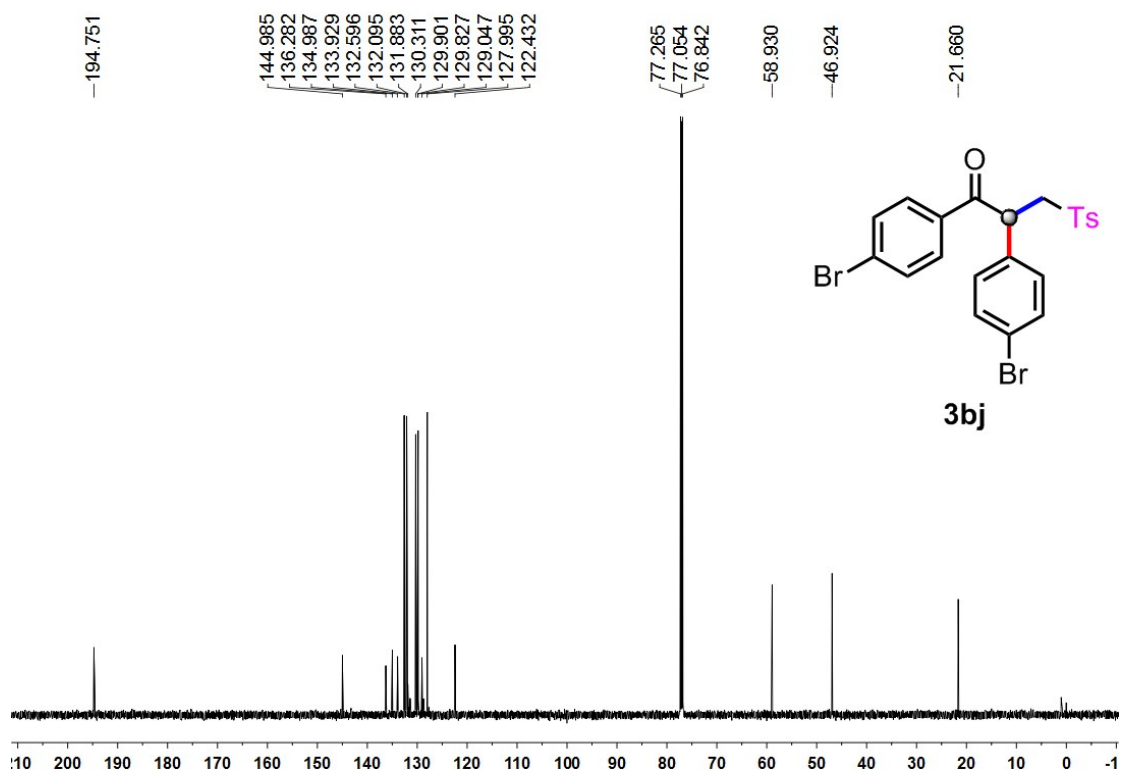

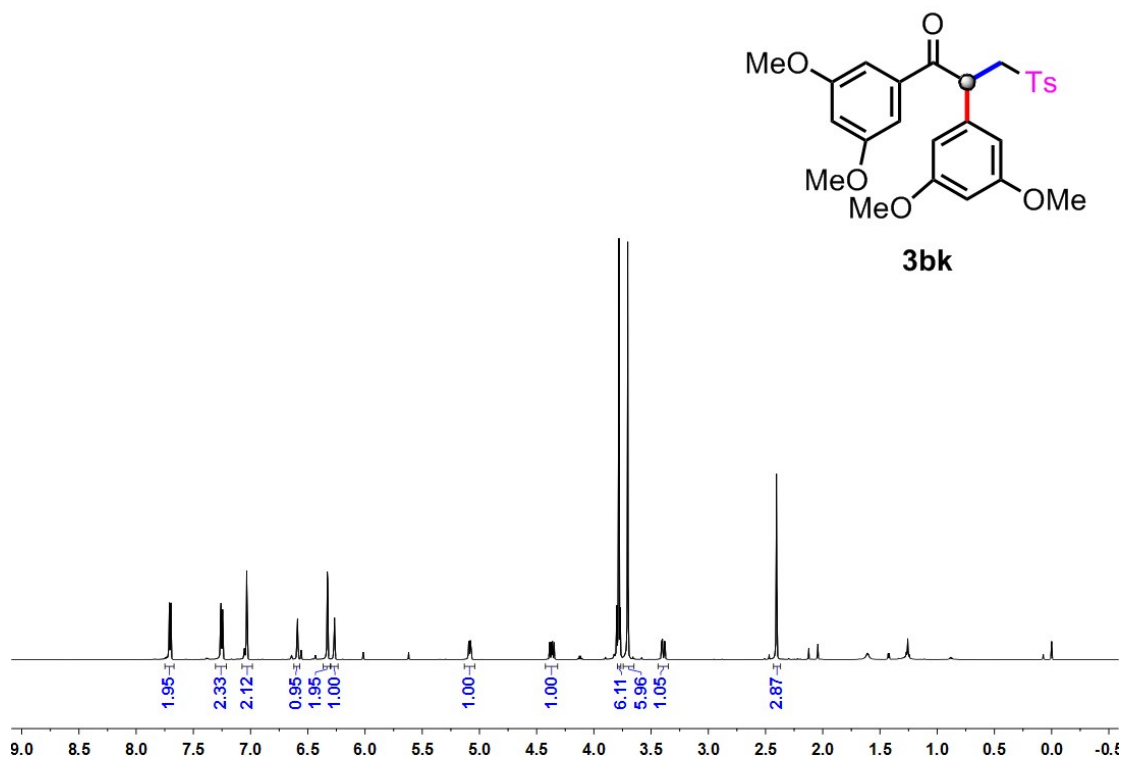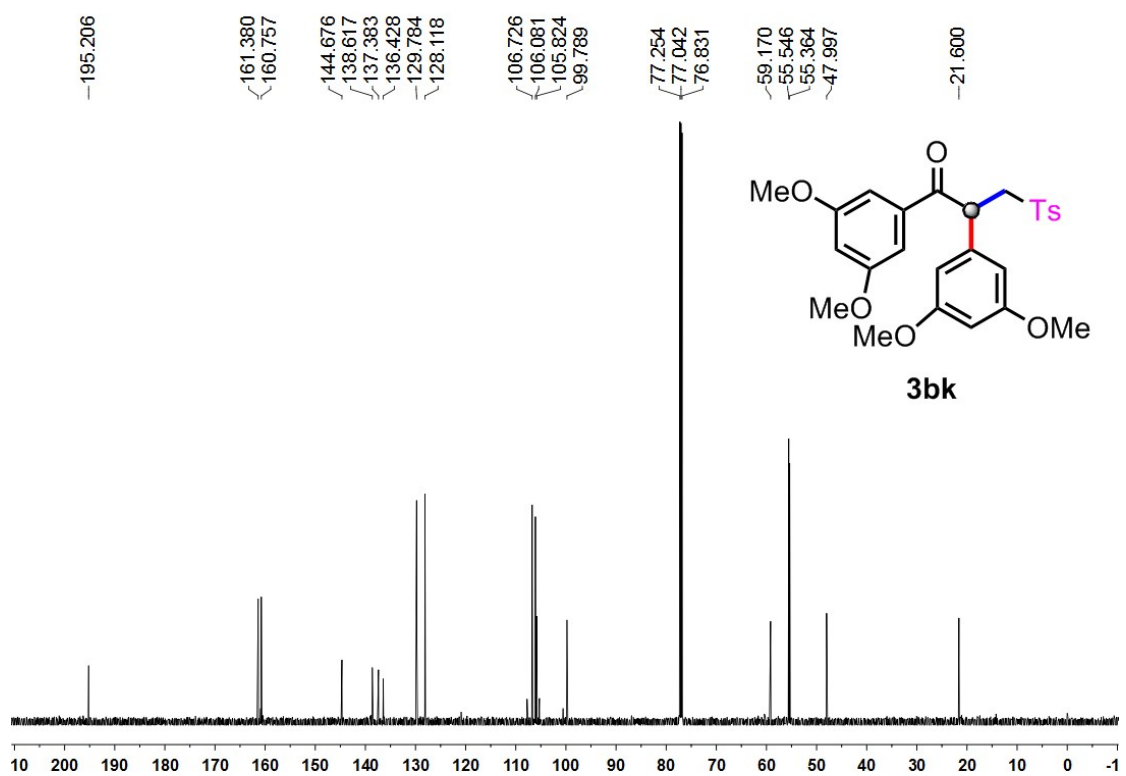

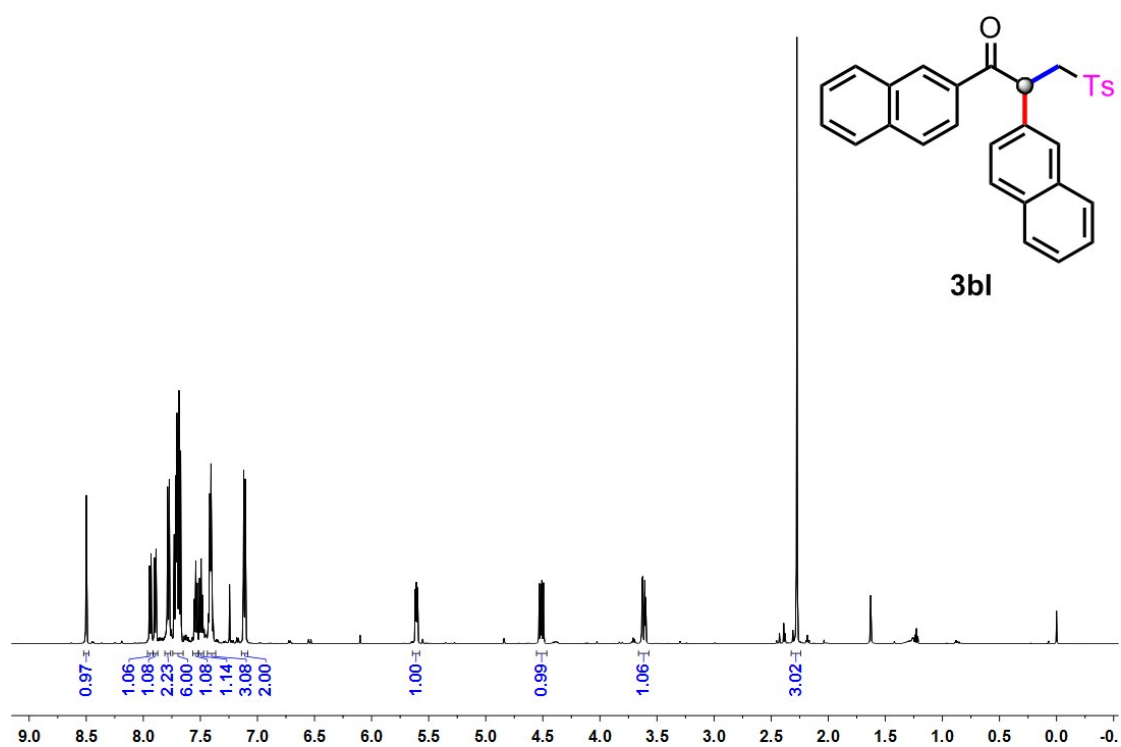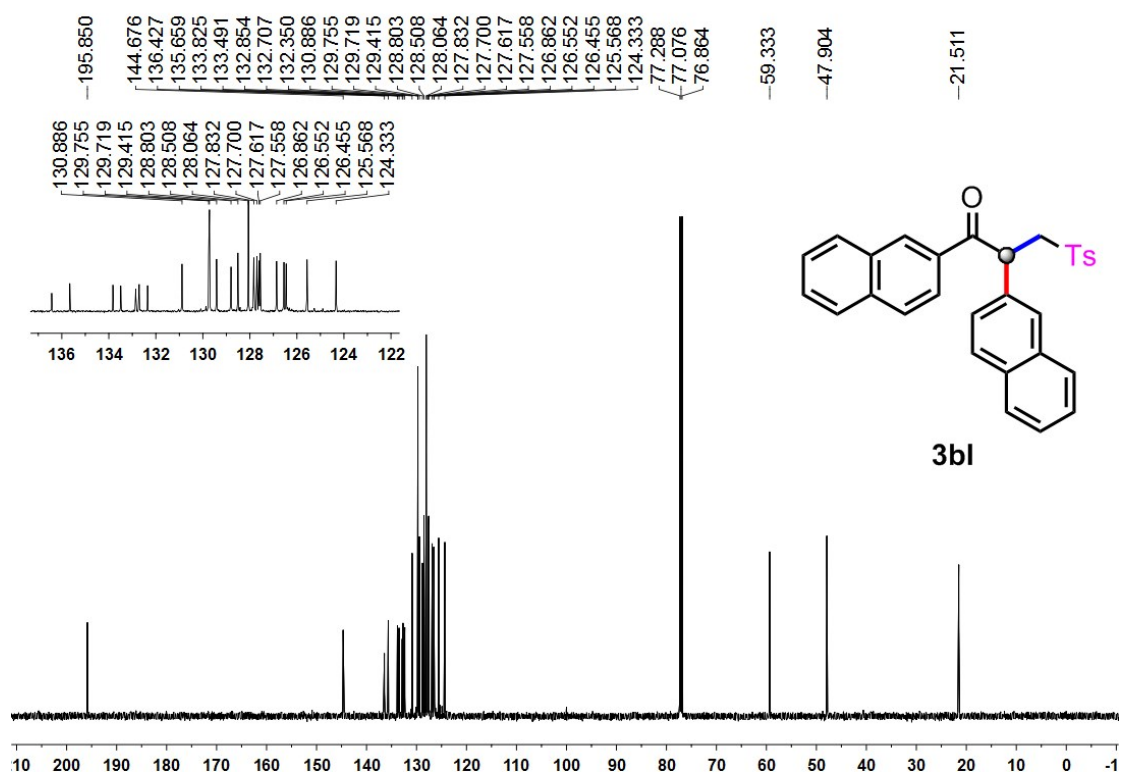



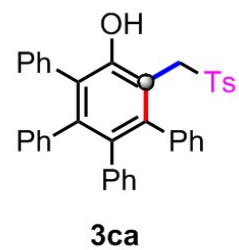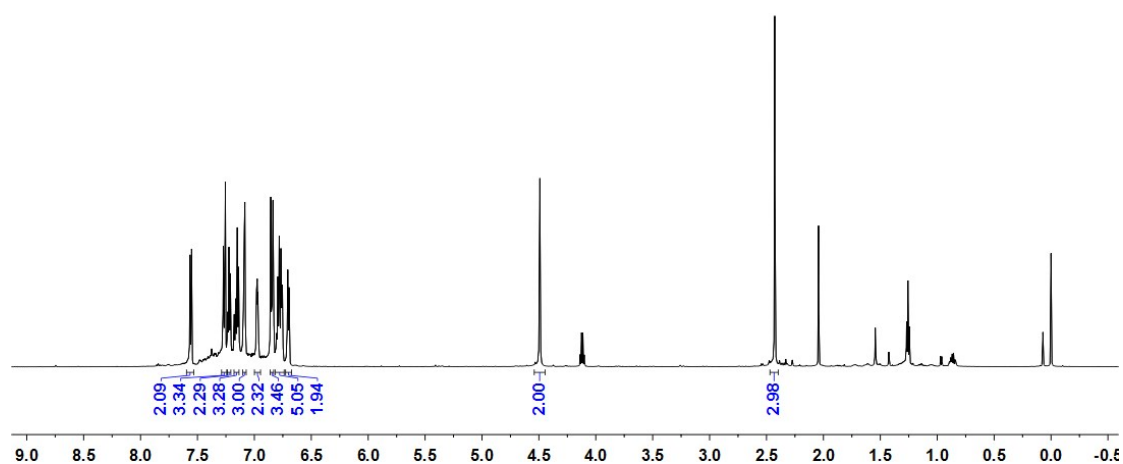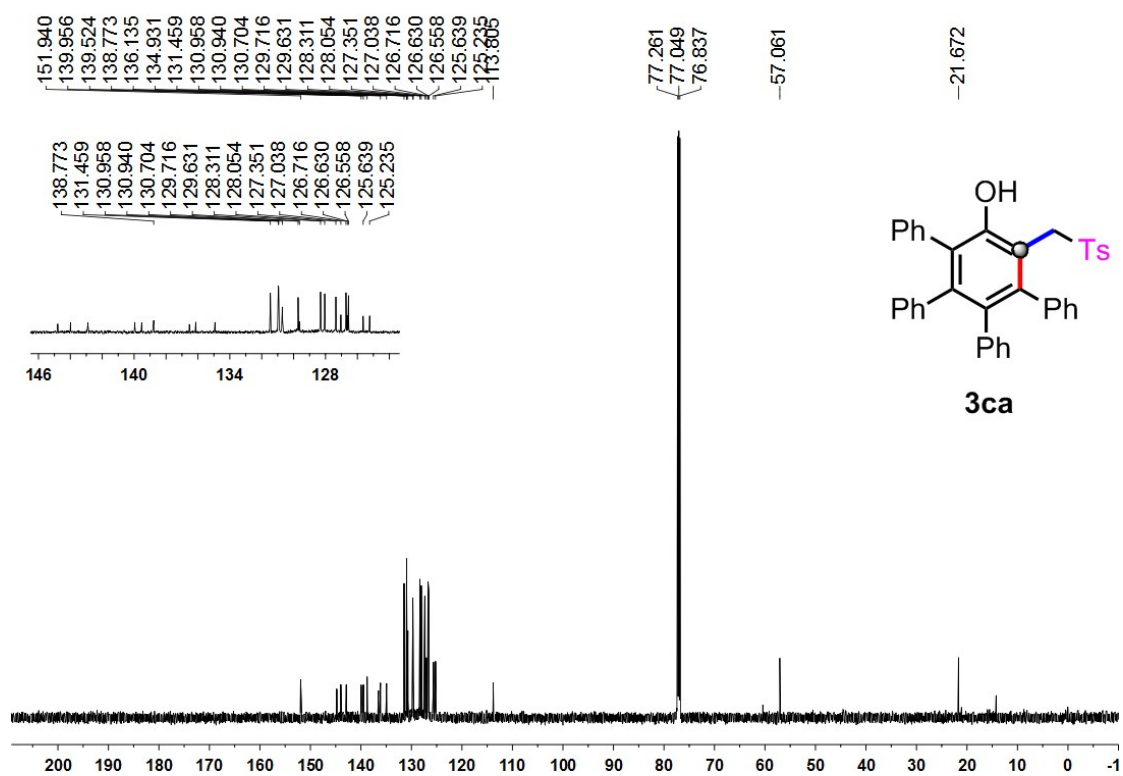

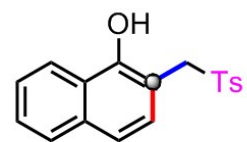**3b**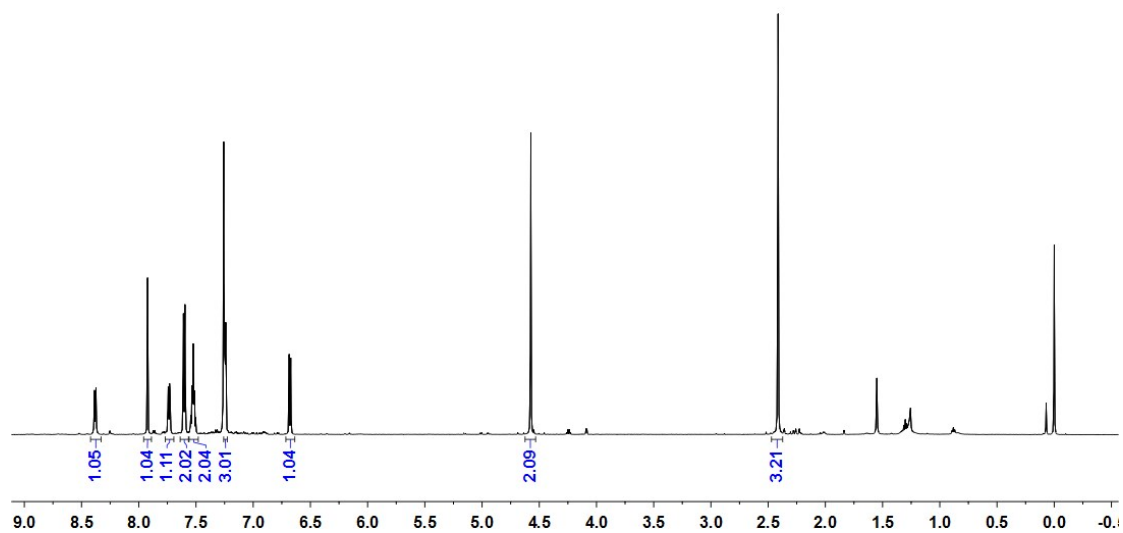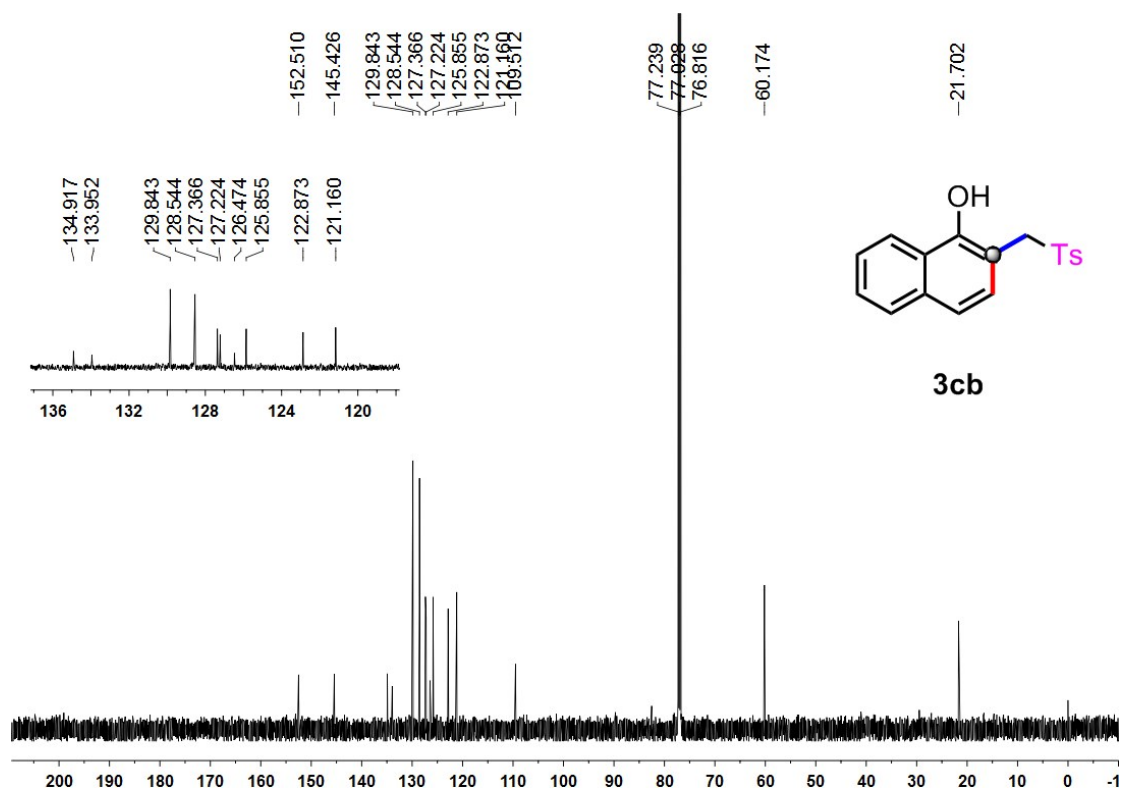

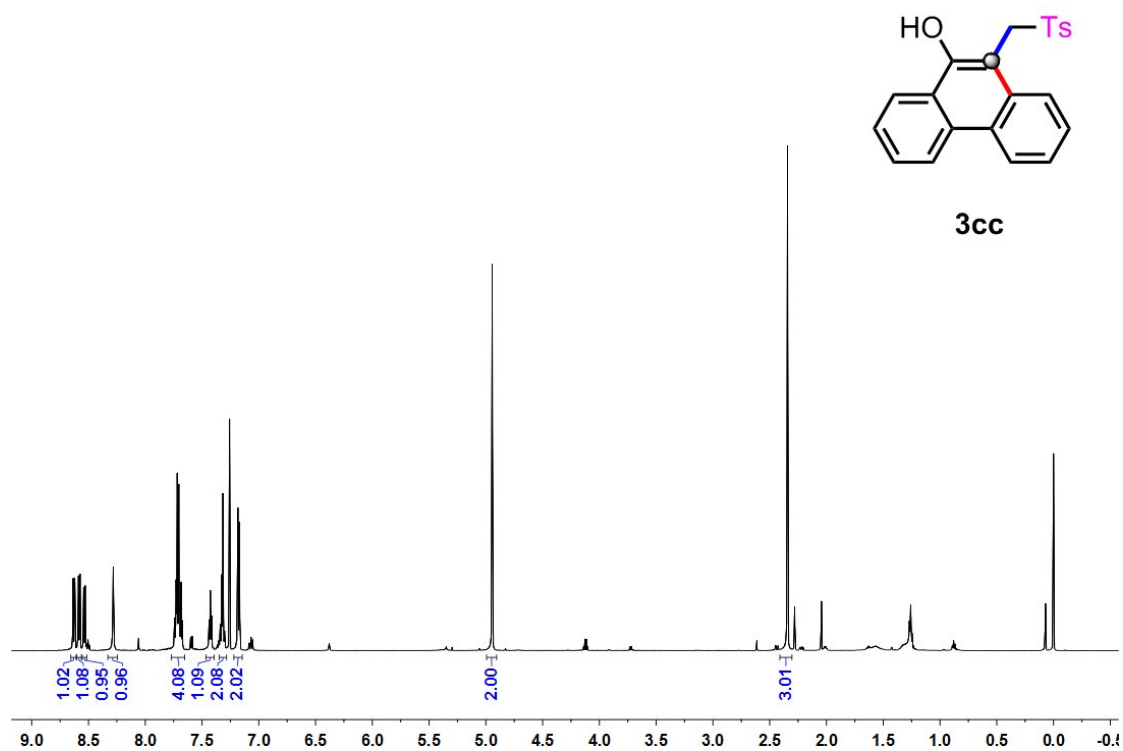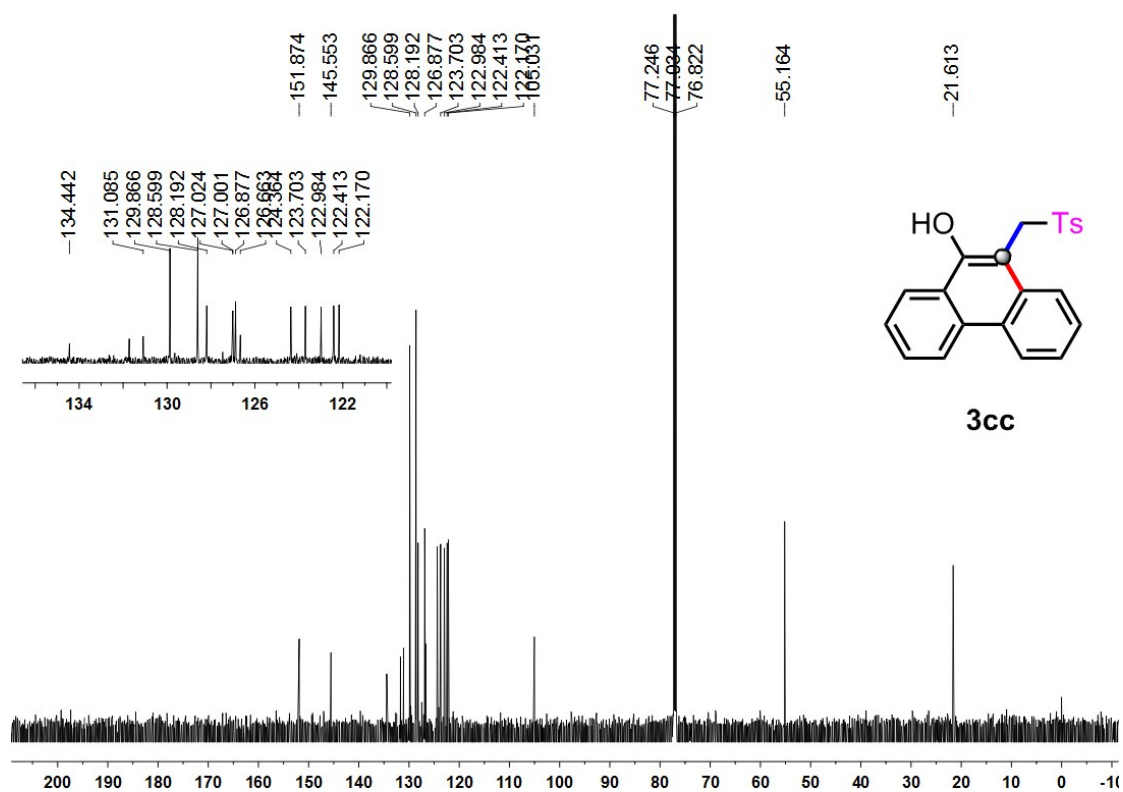

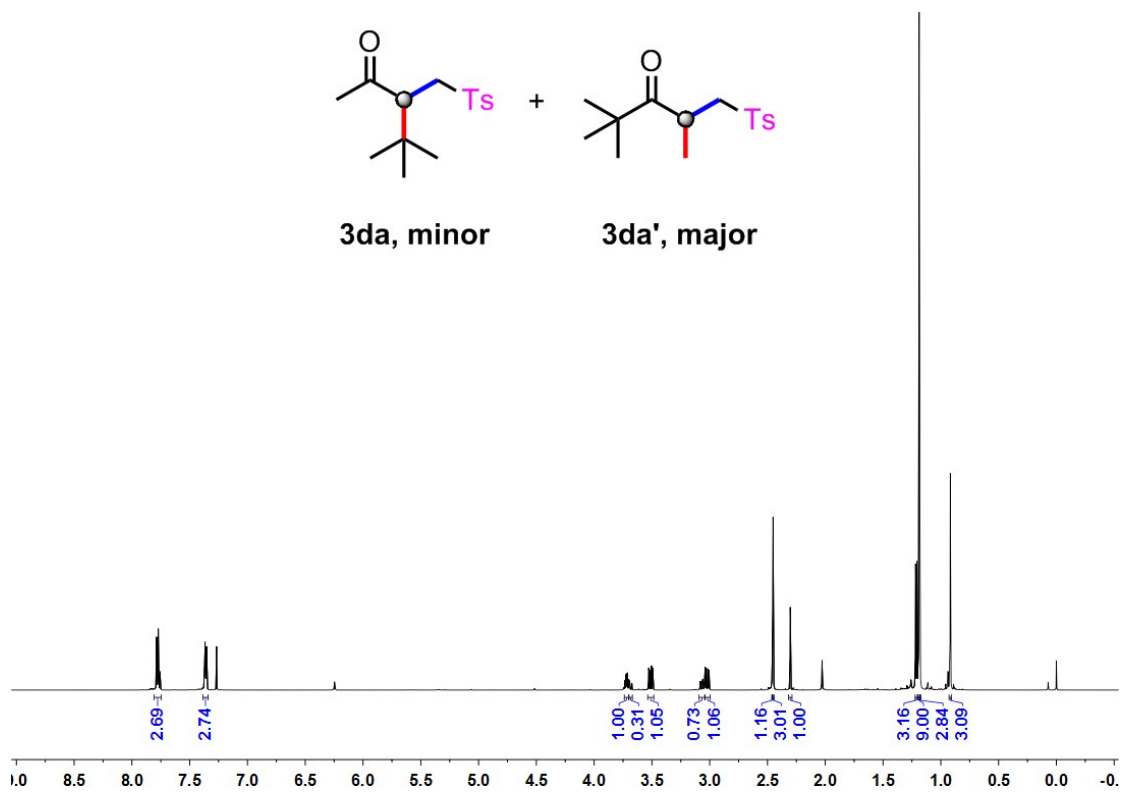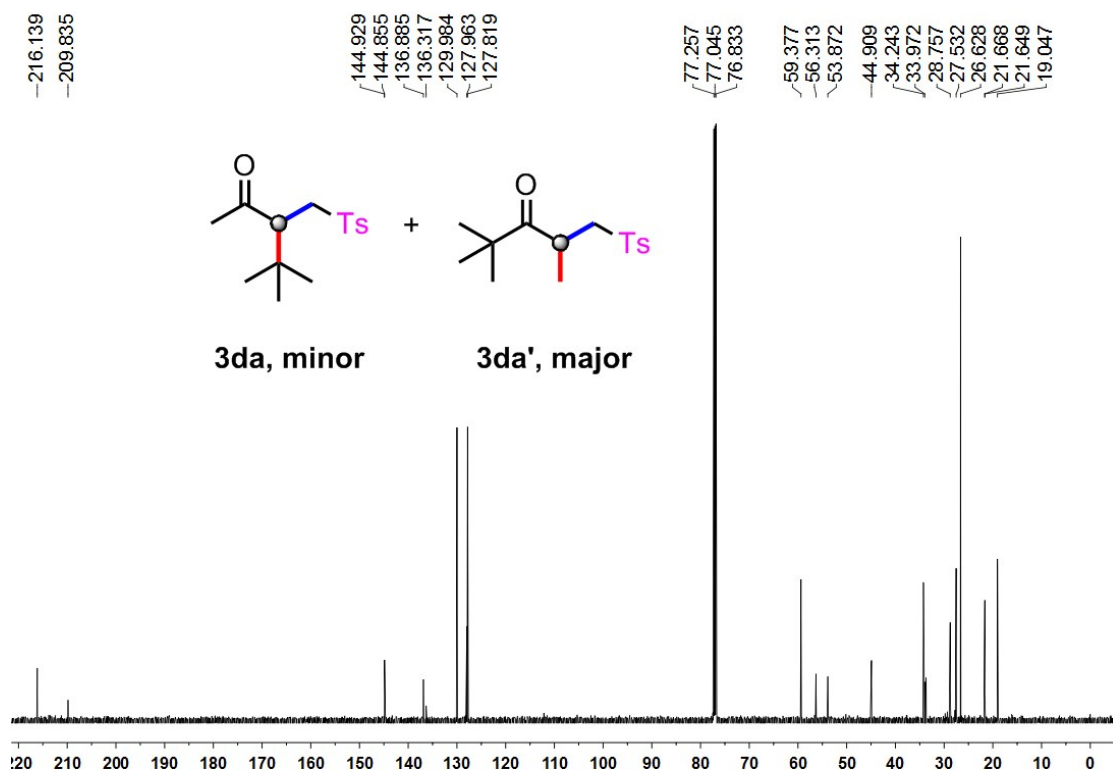

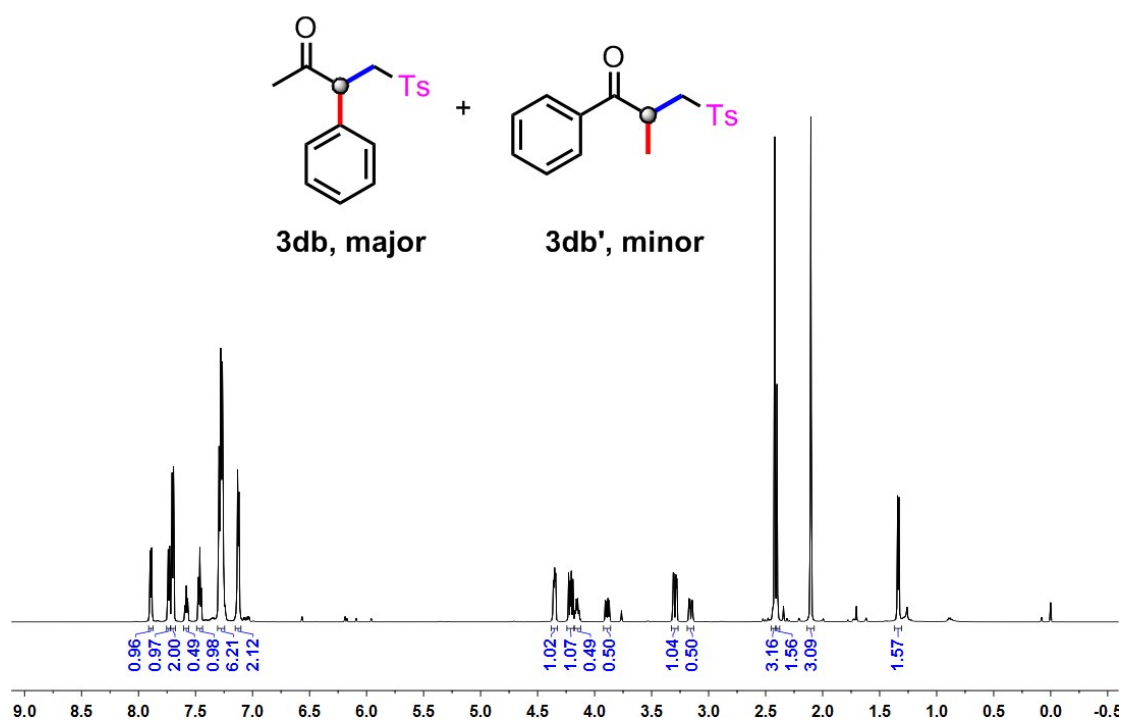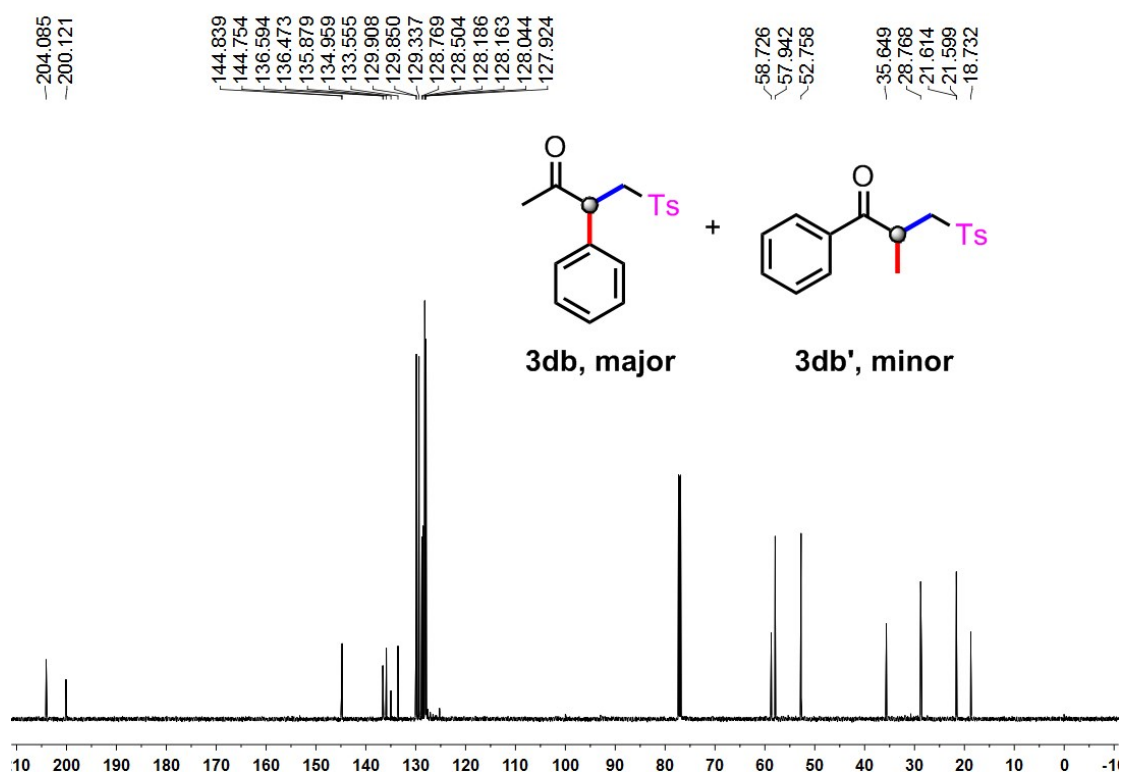

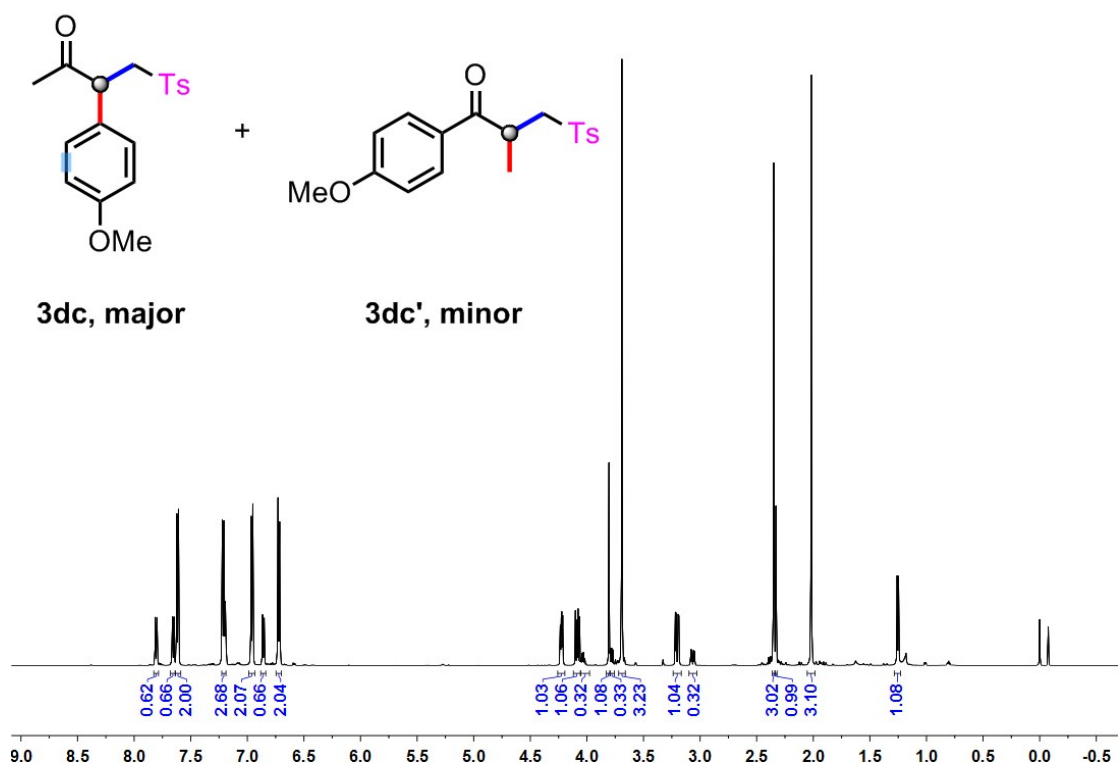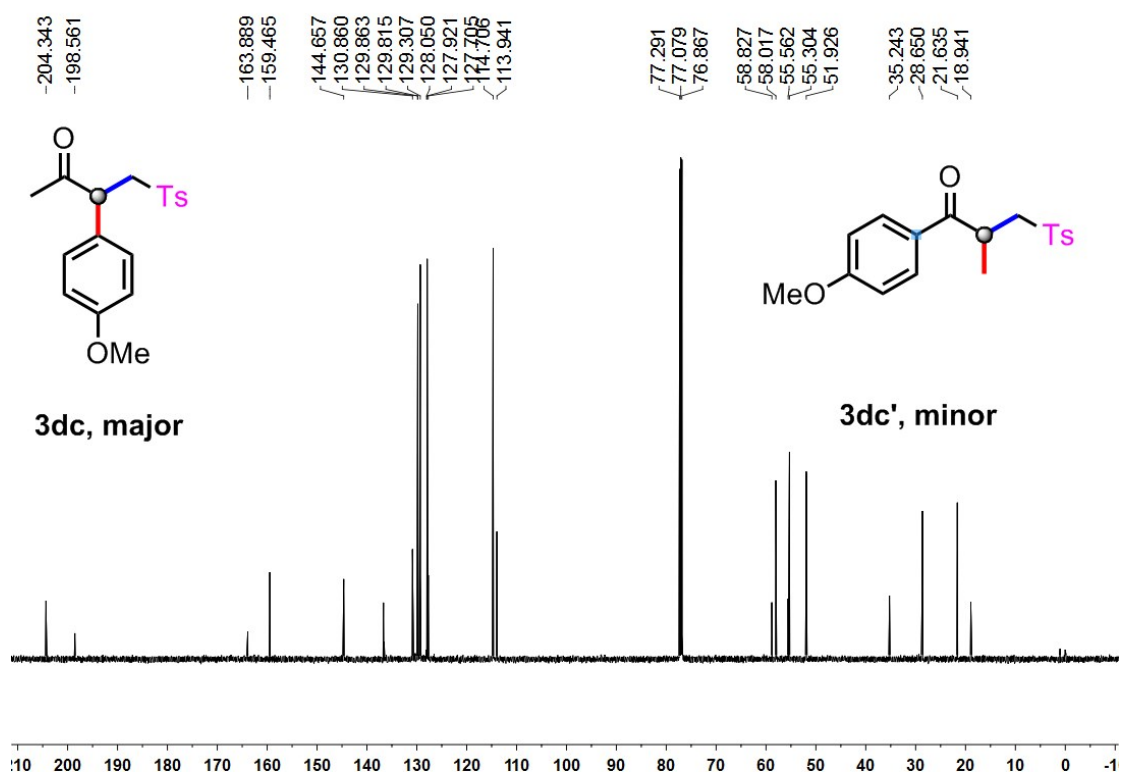

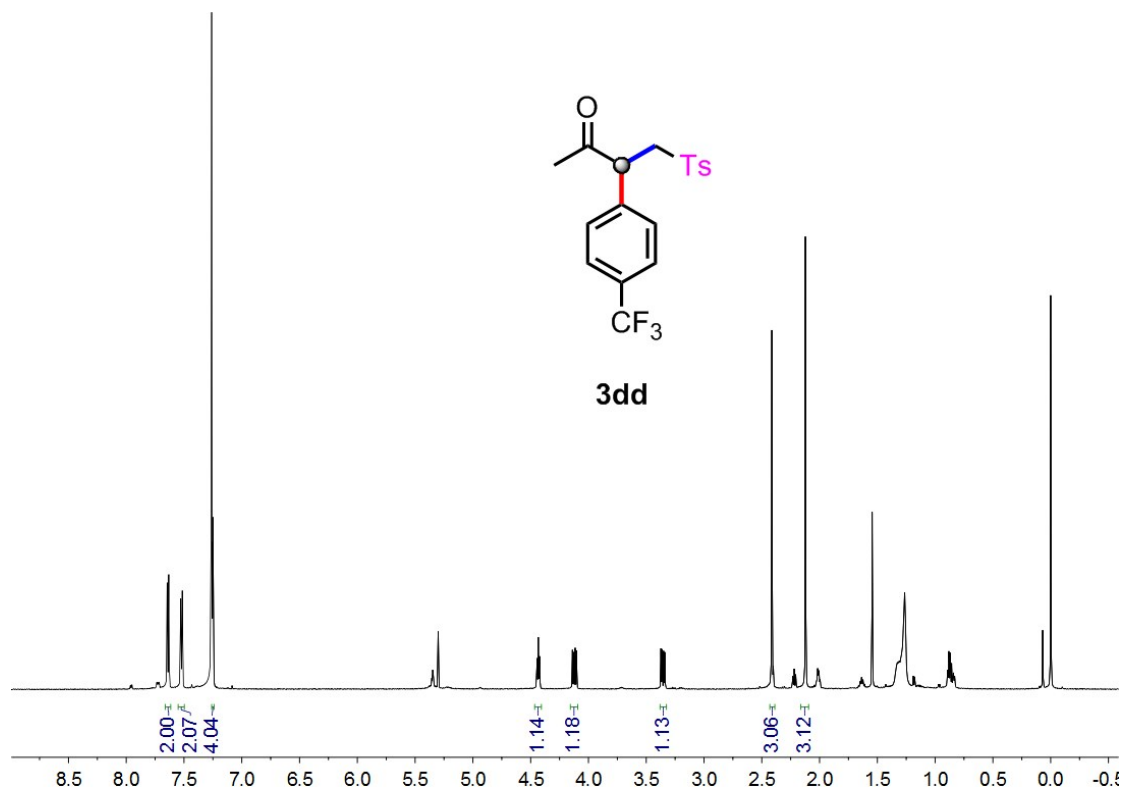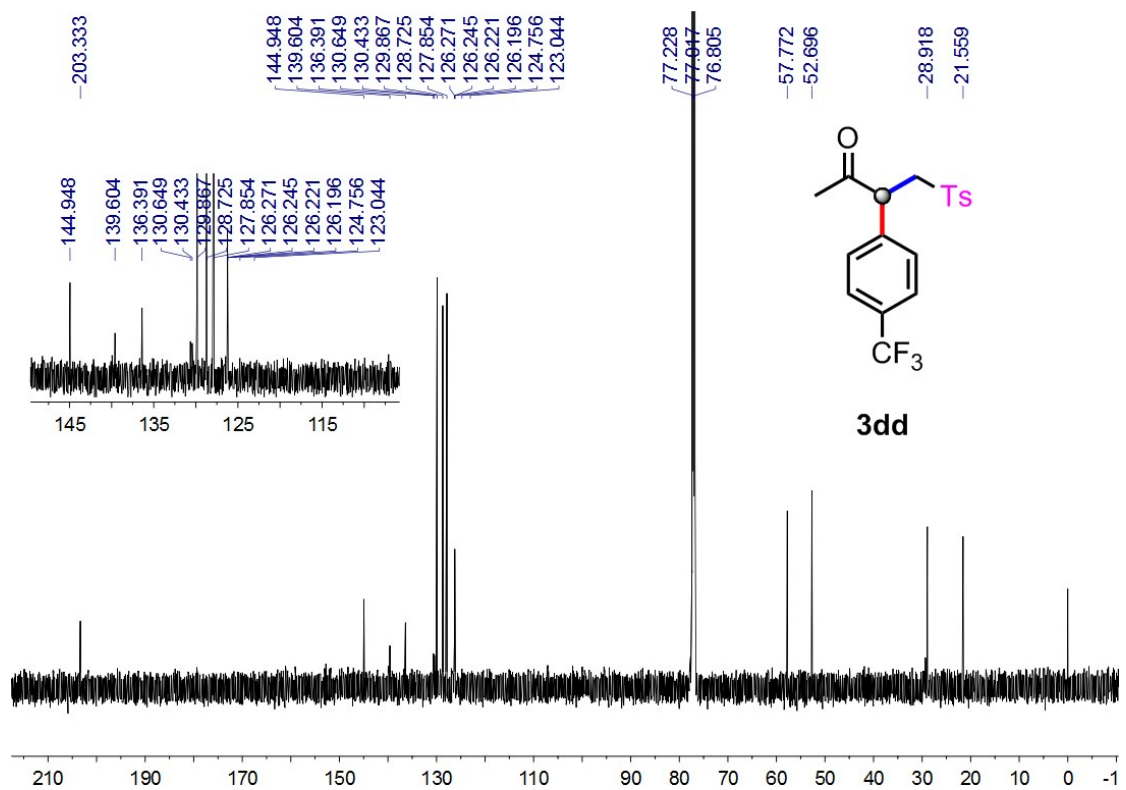

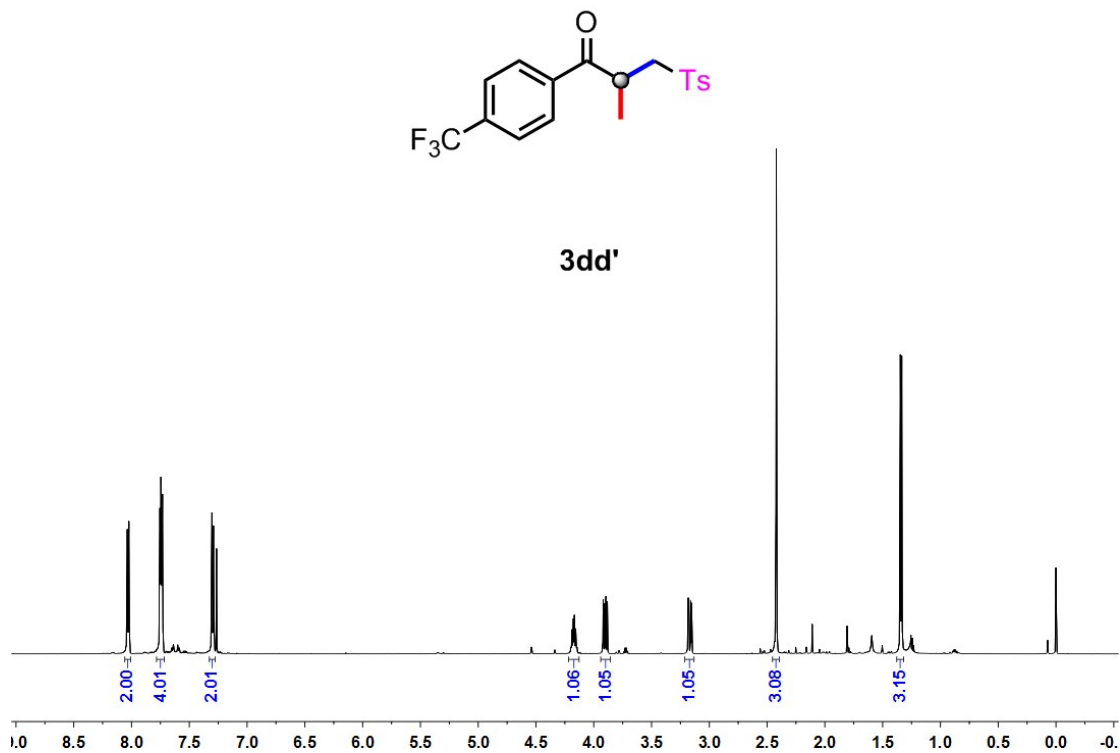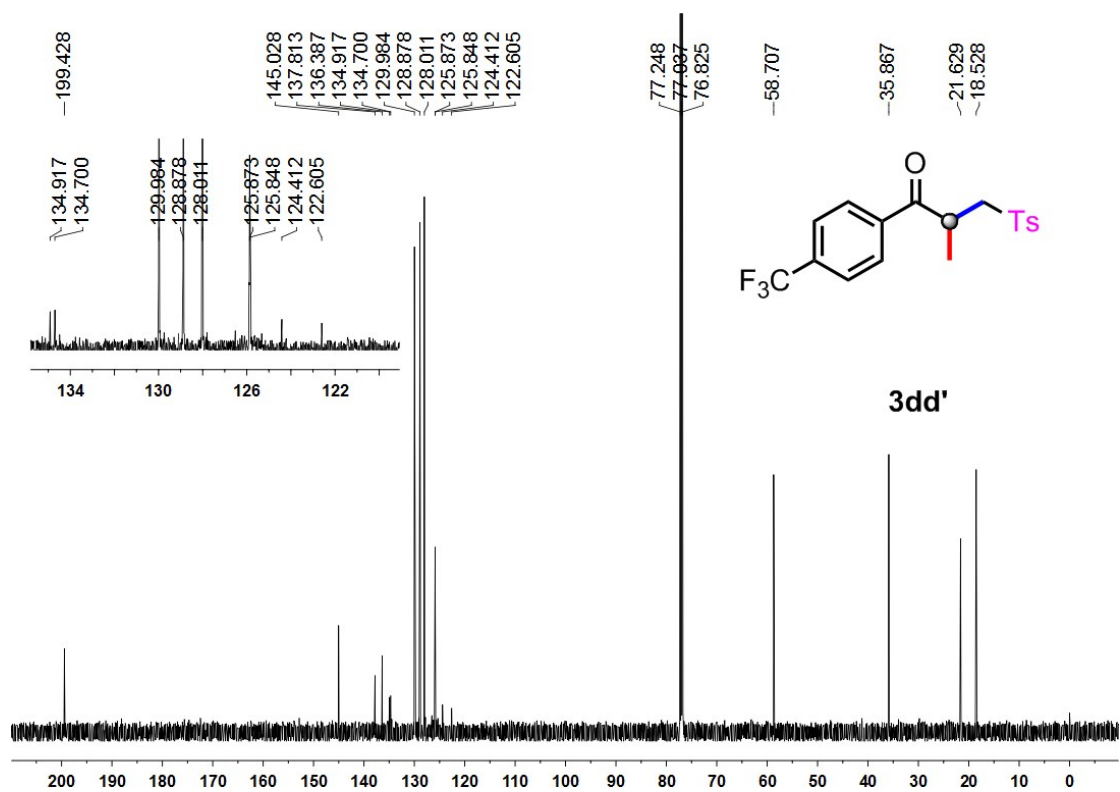



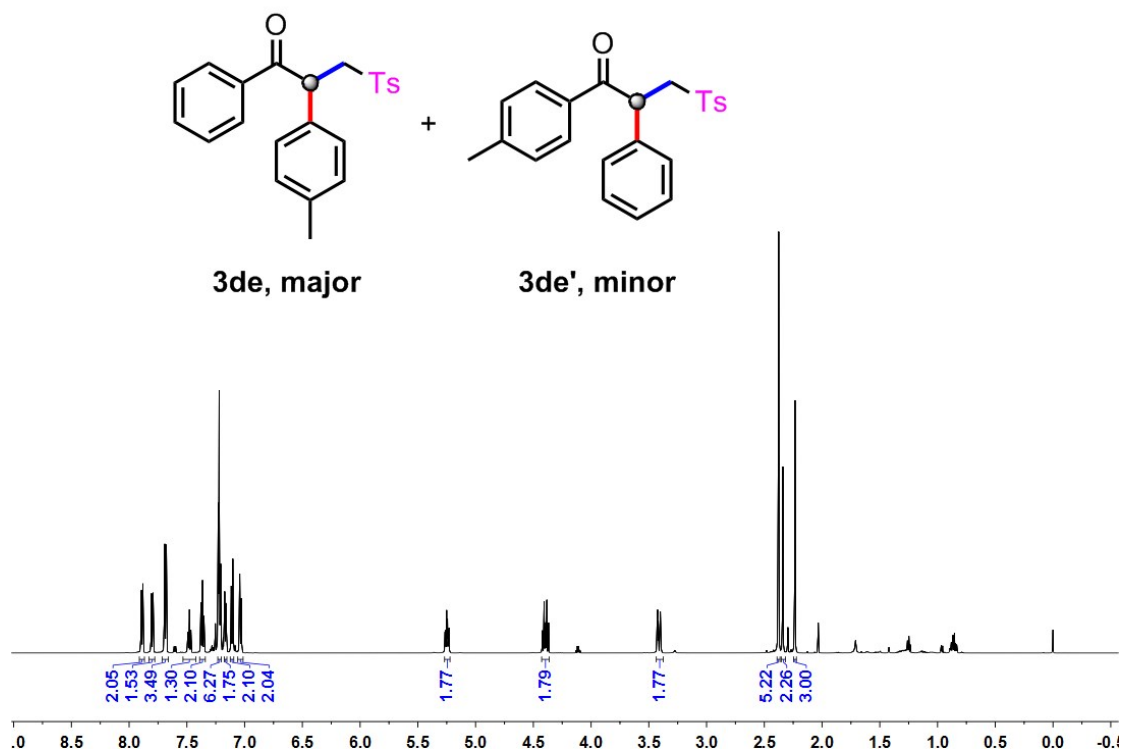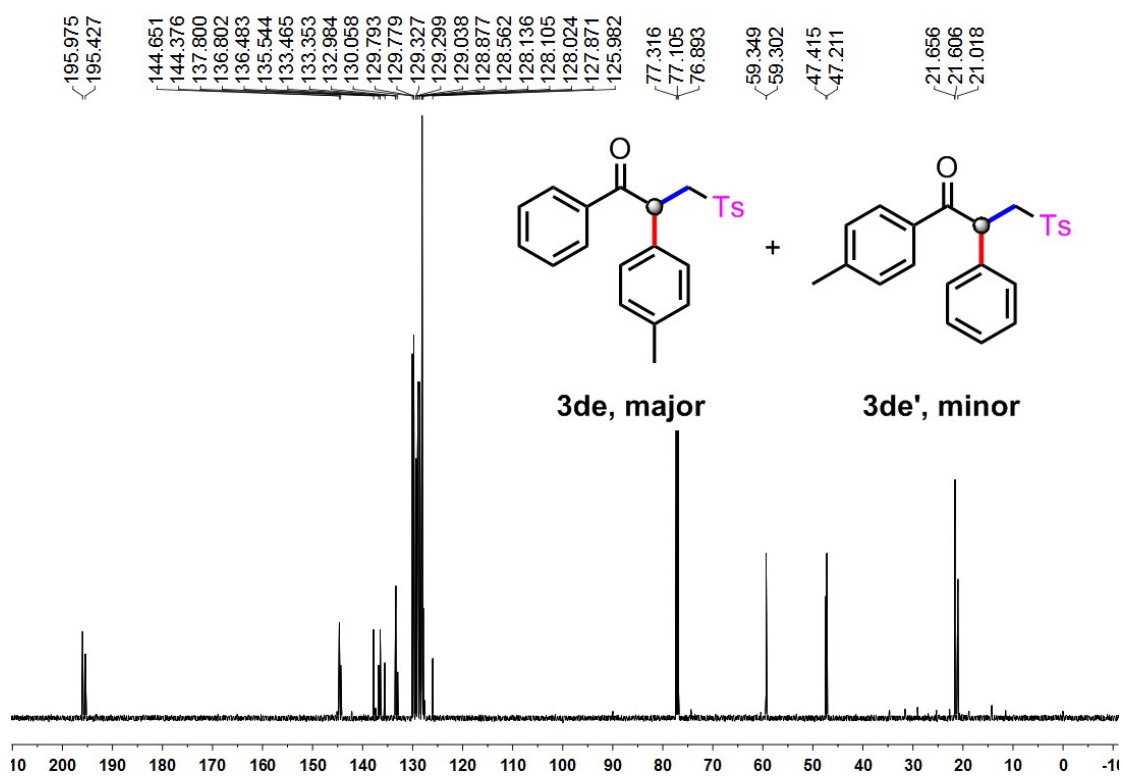

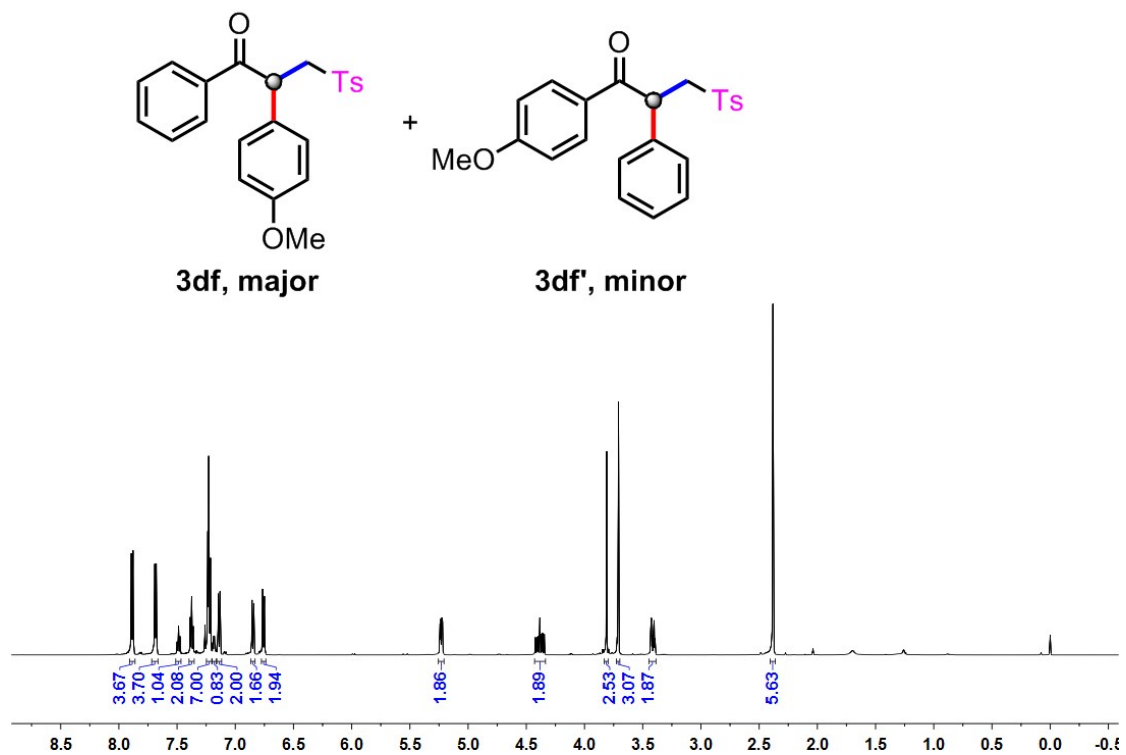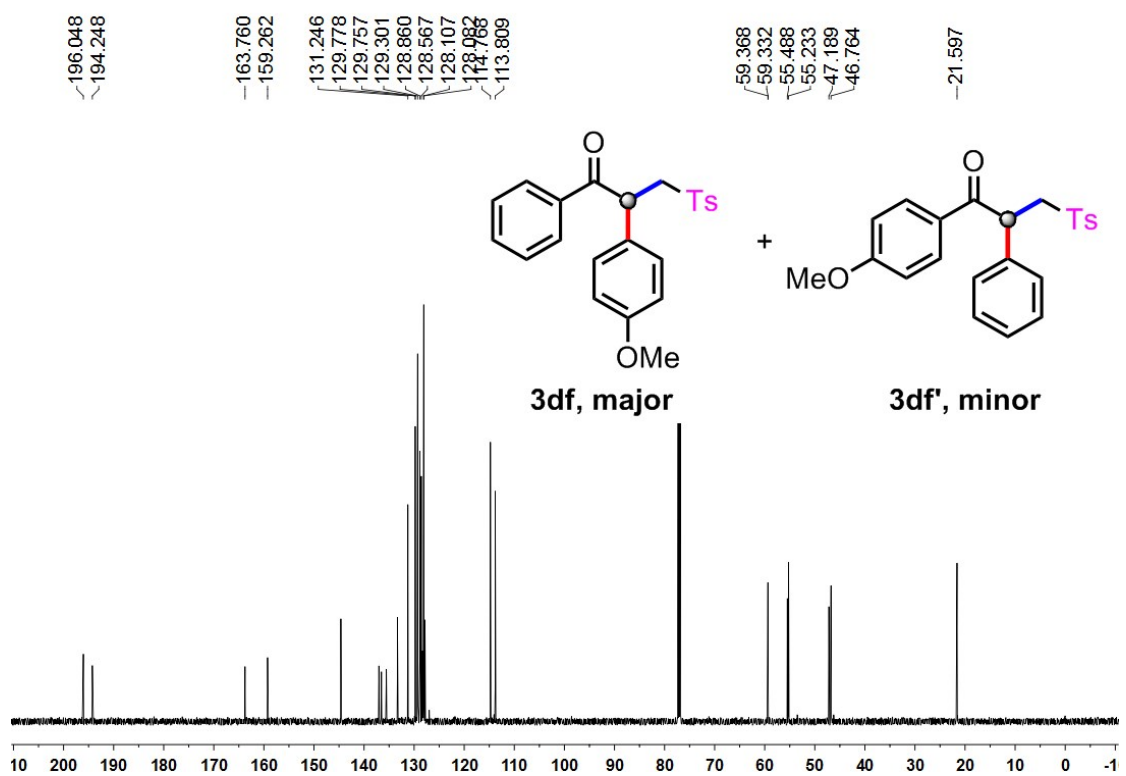

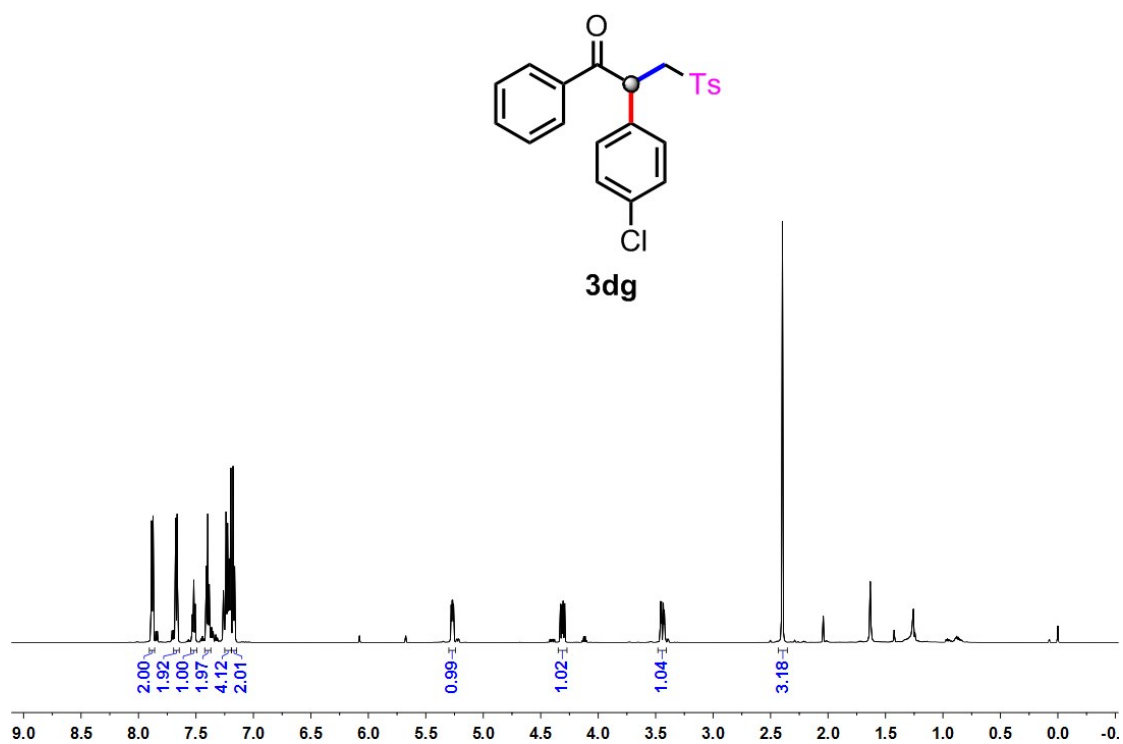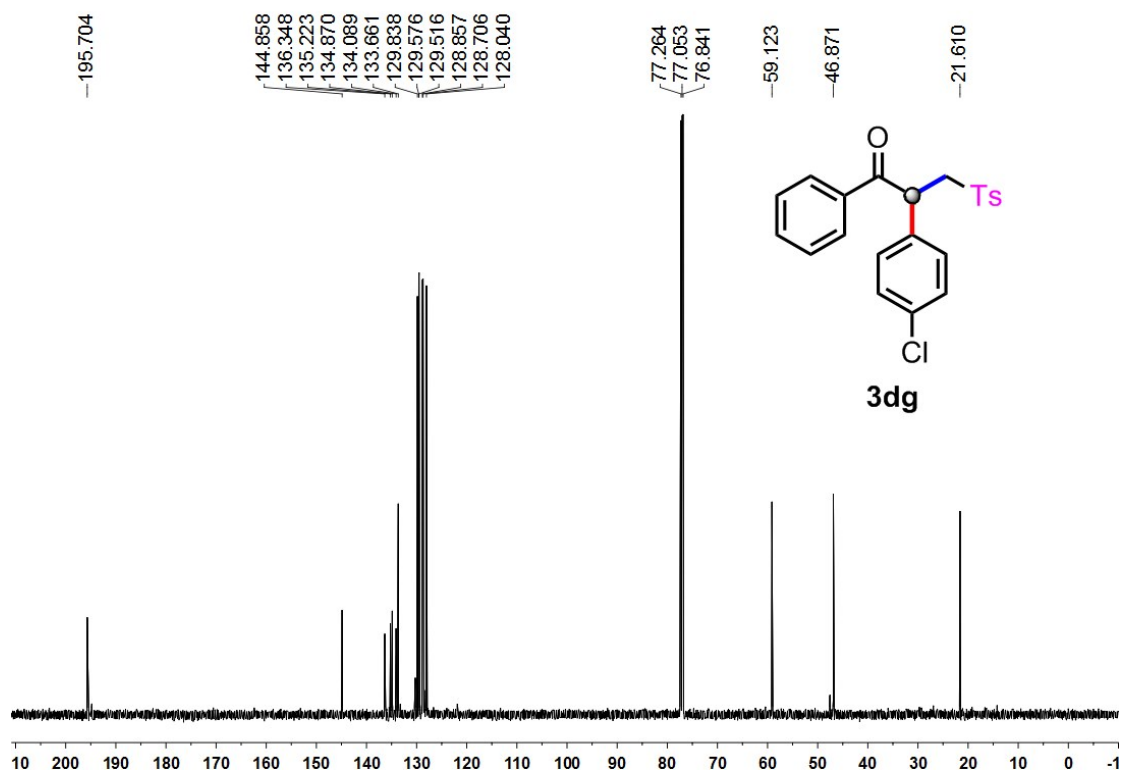

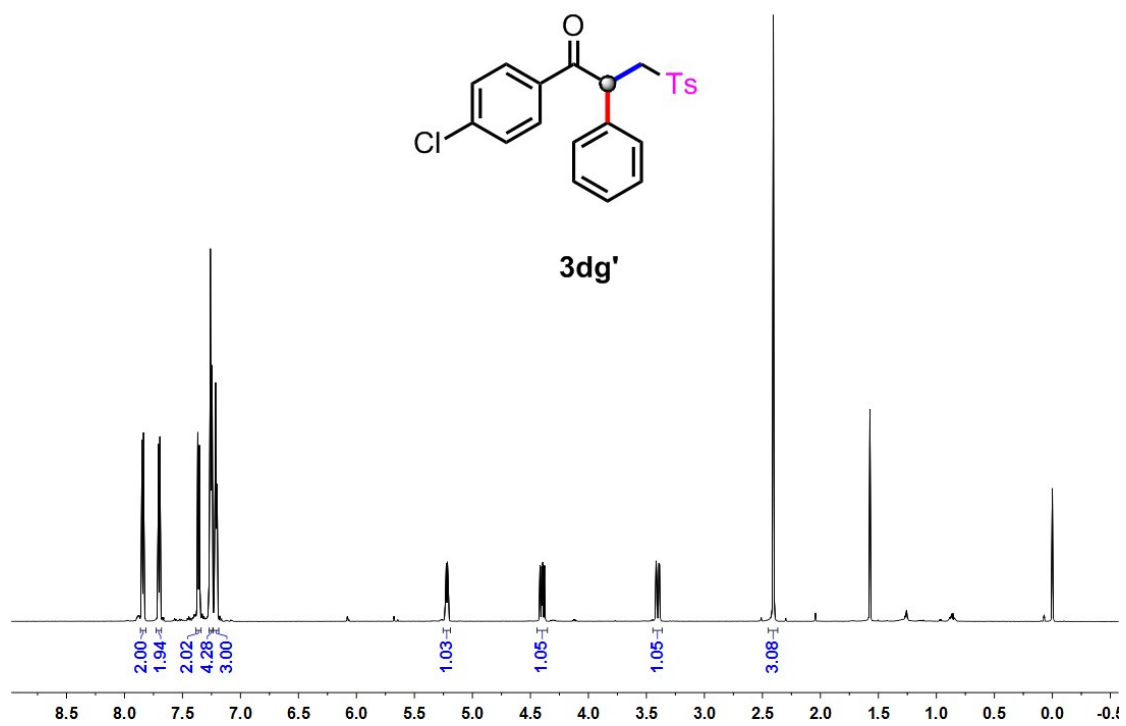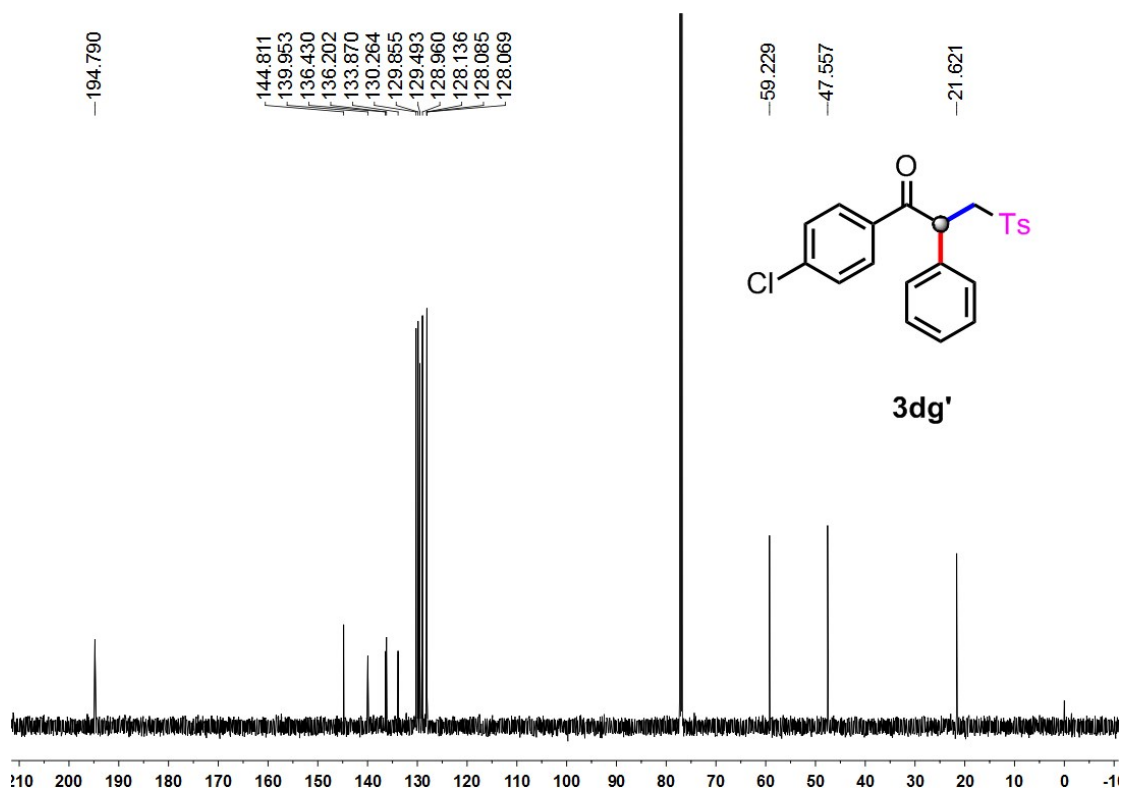

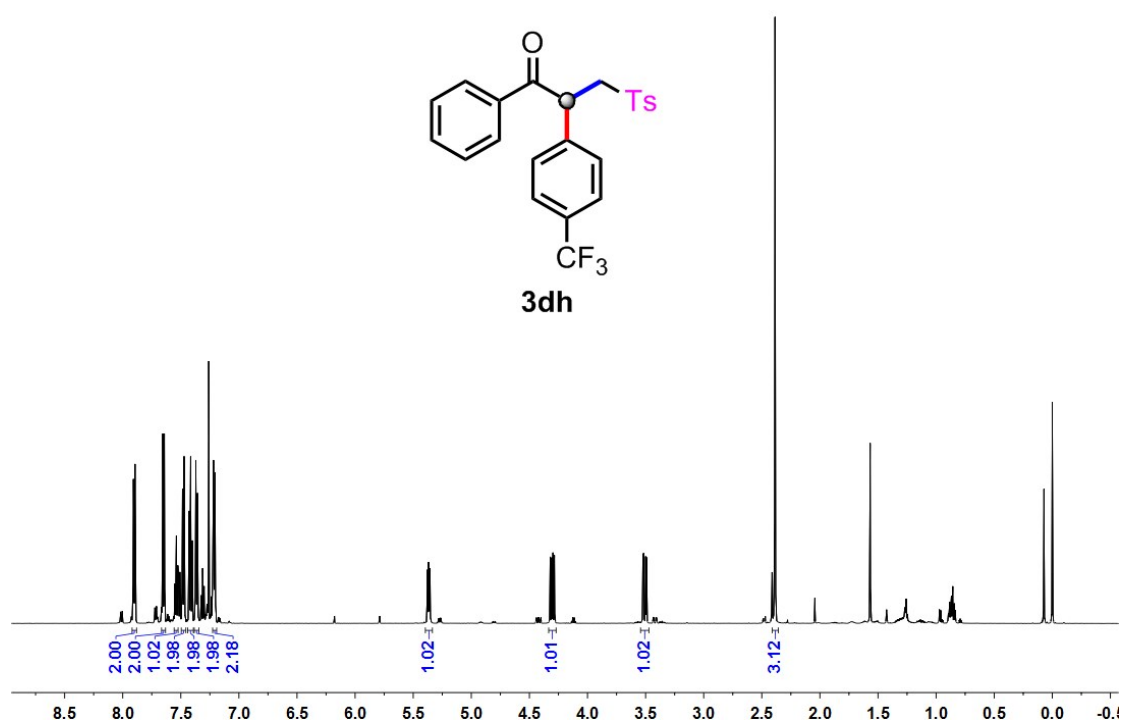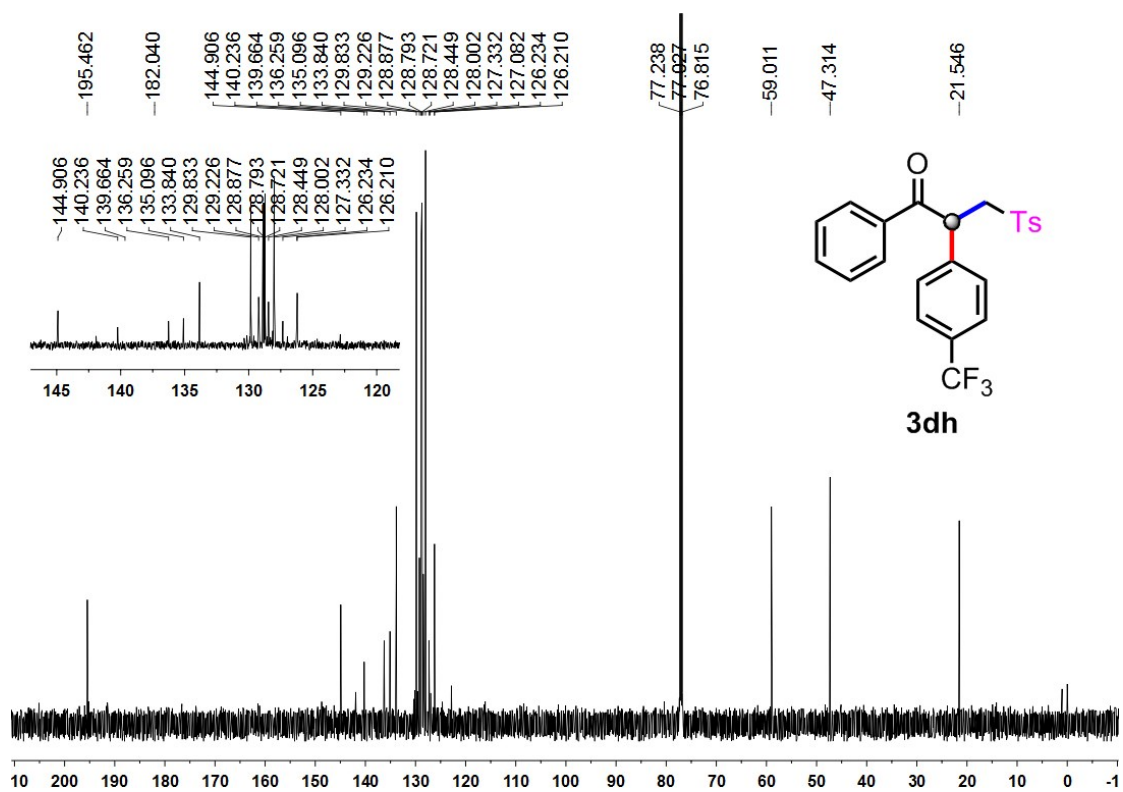

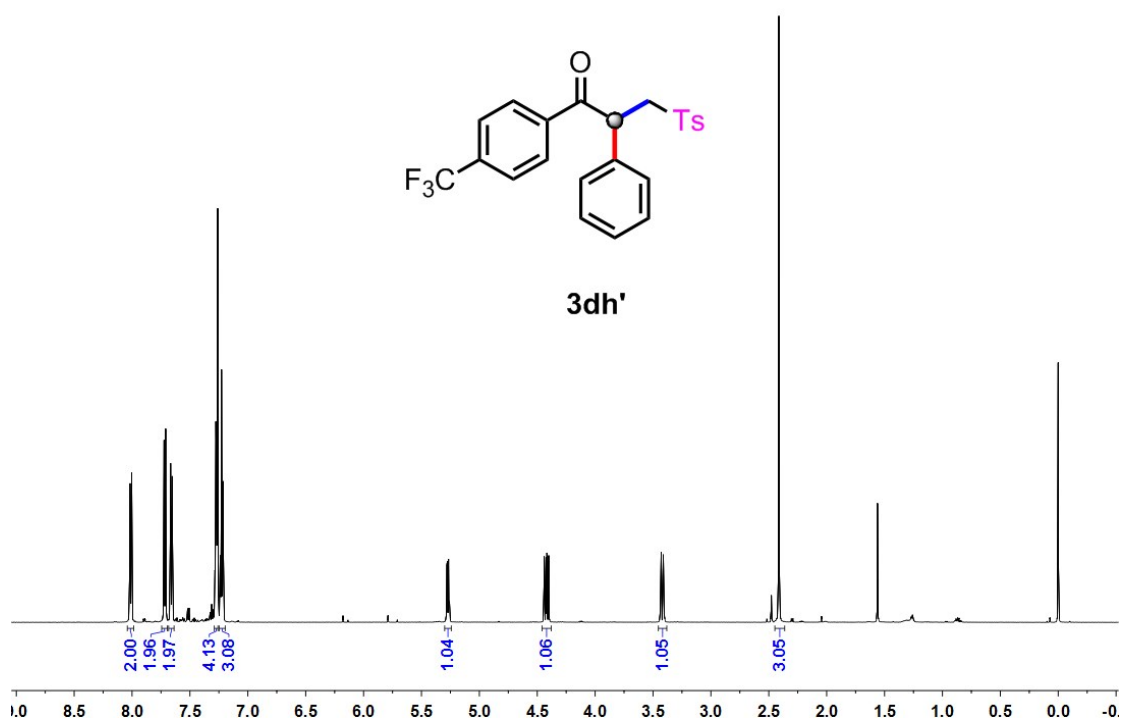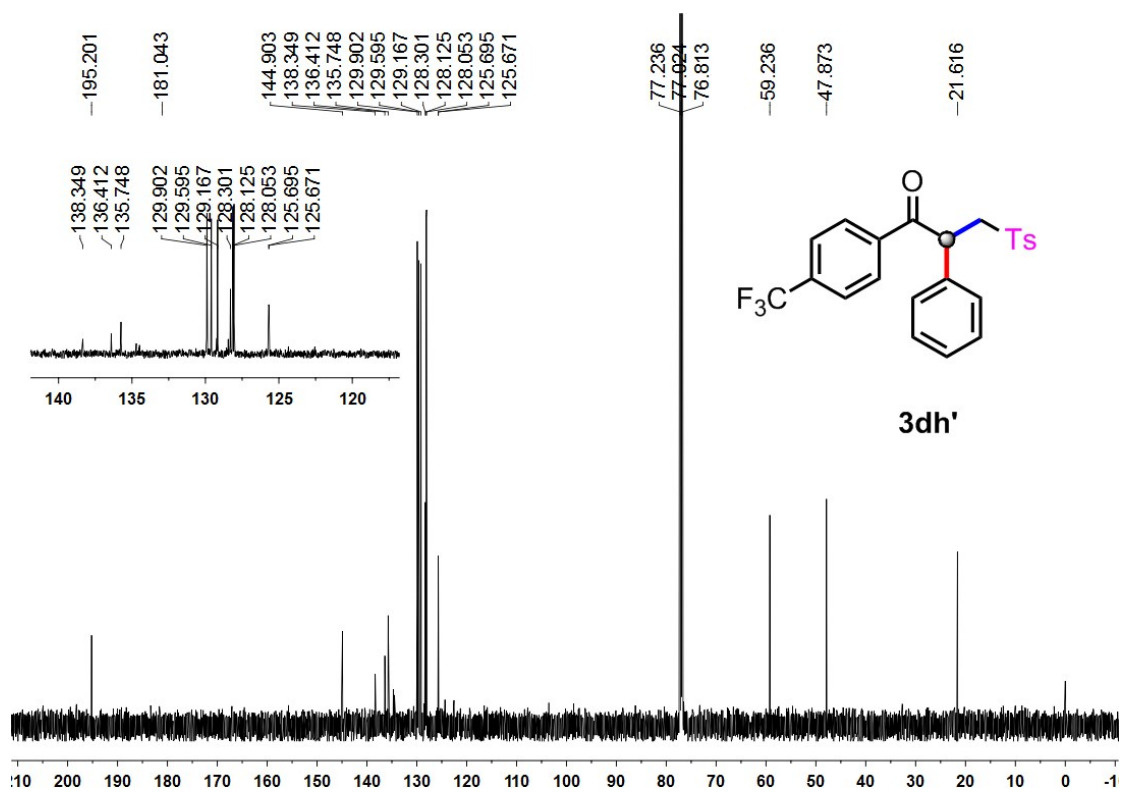

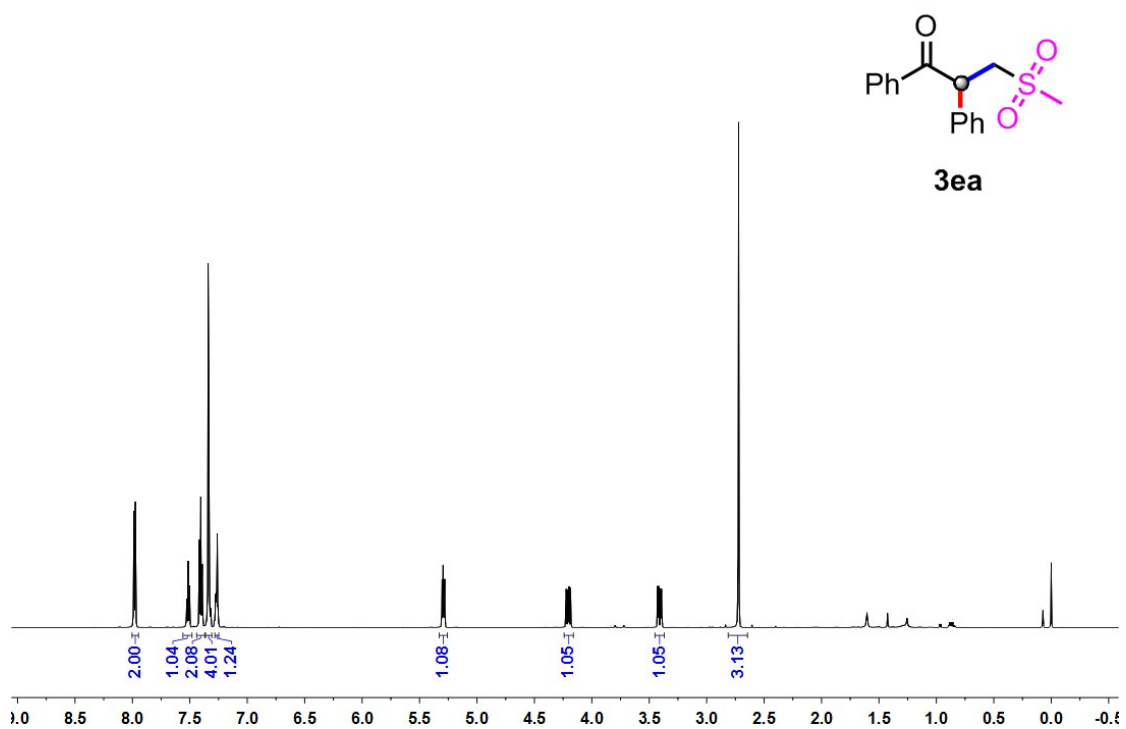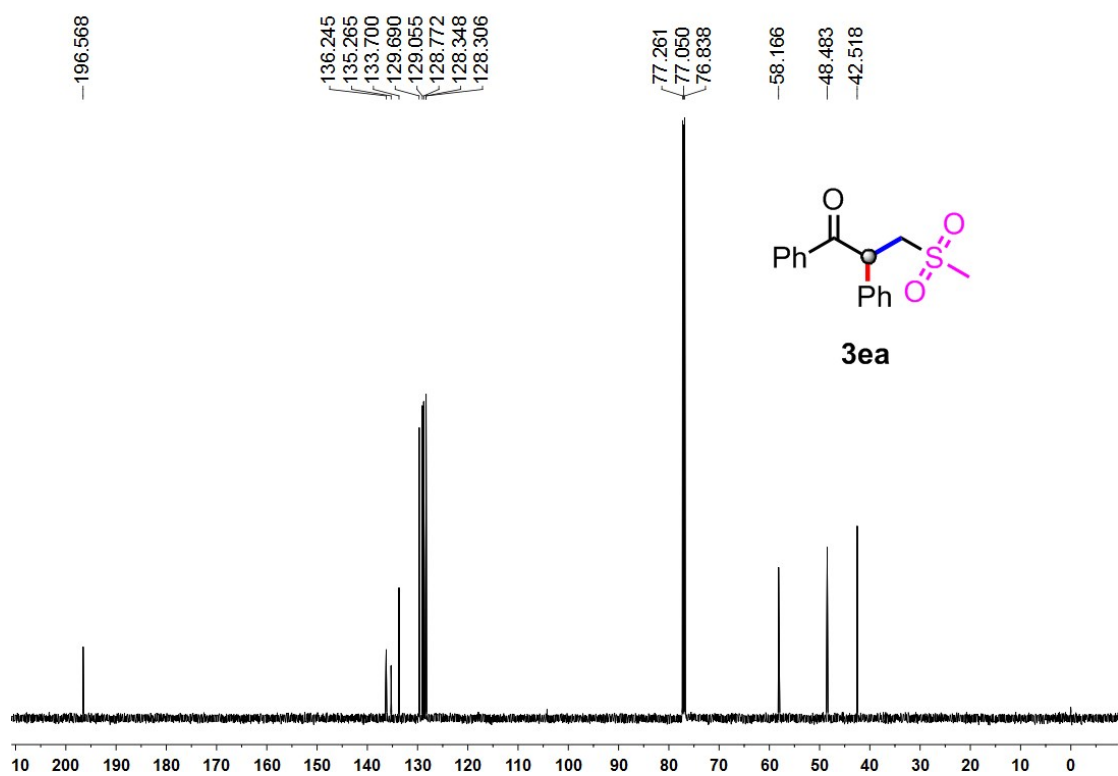

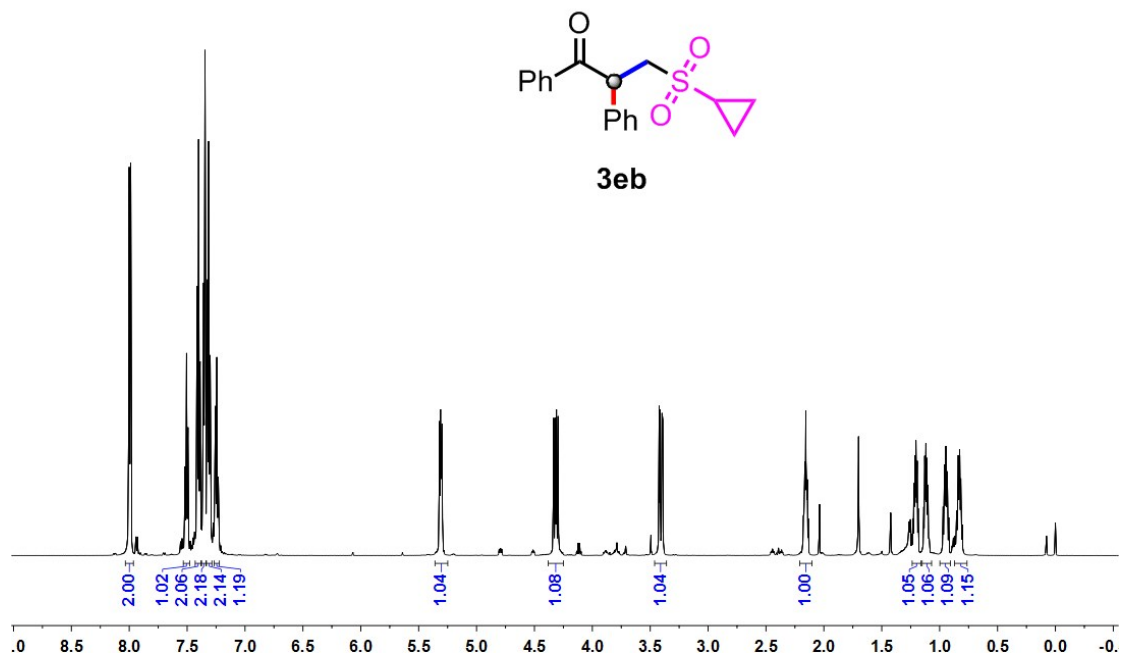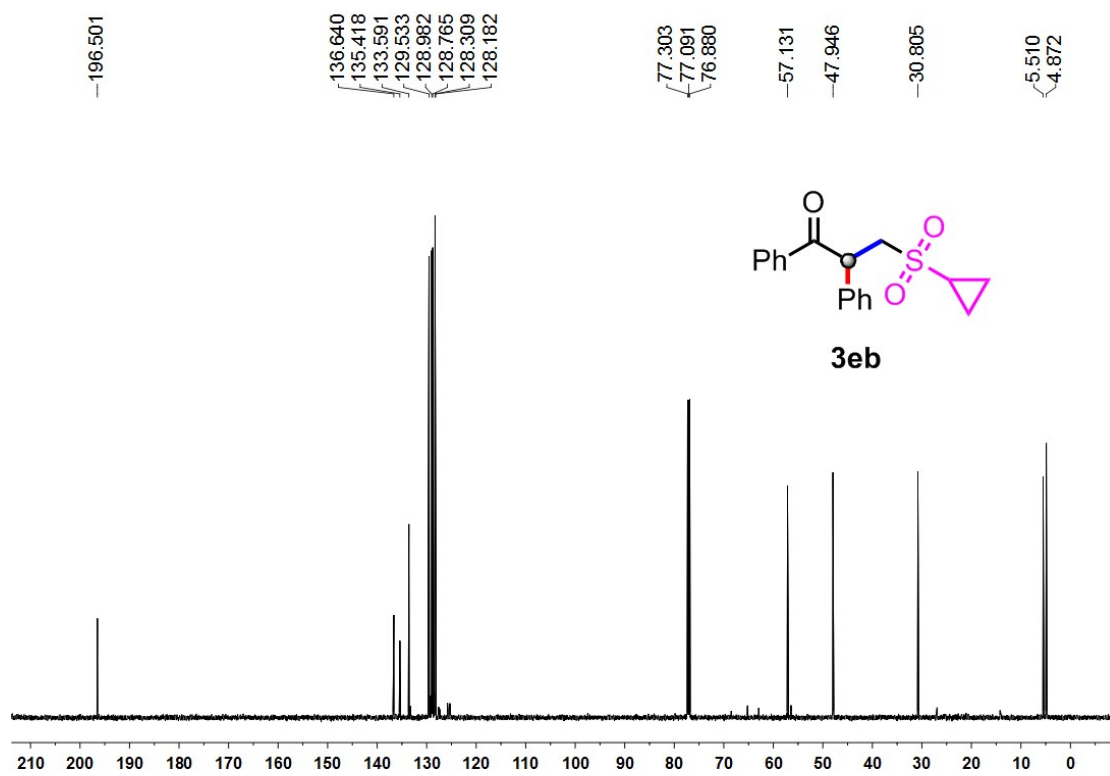



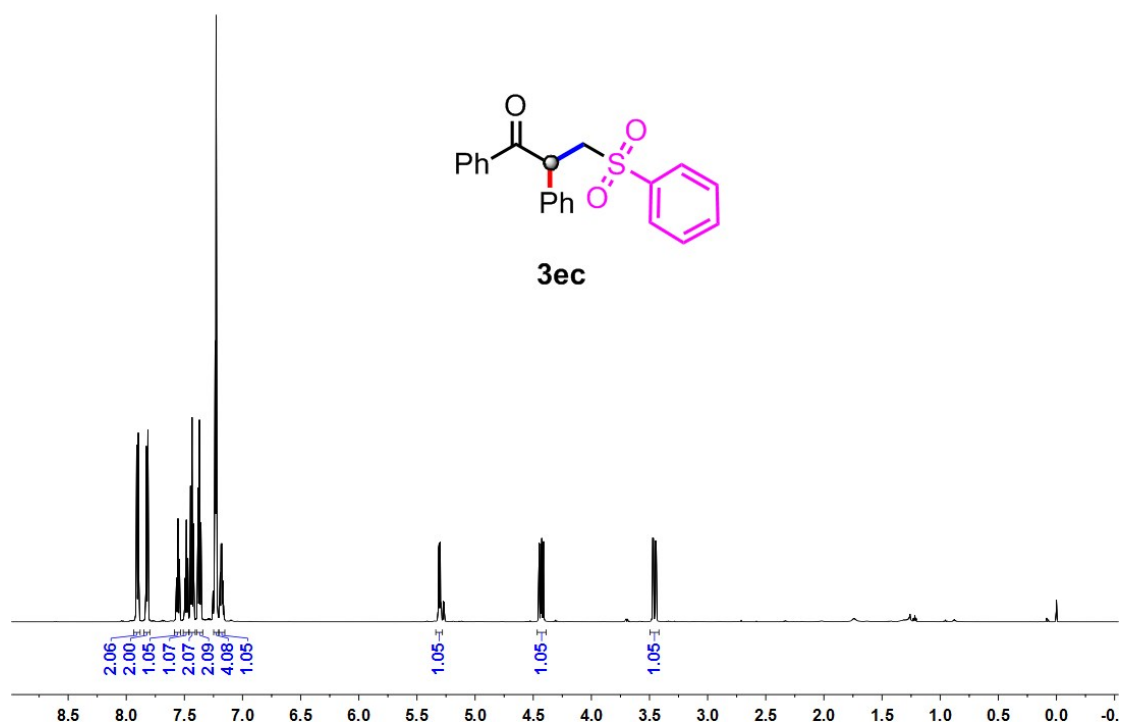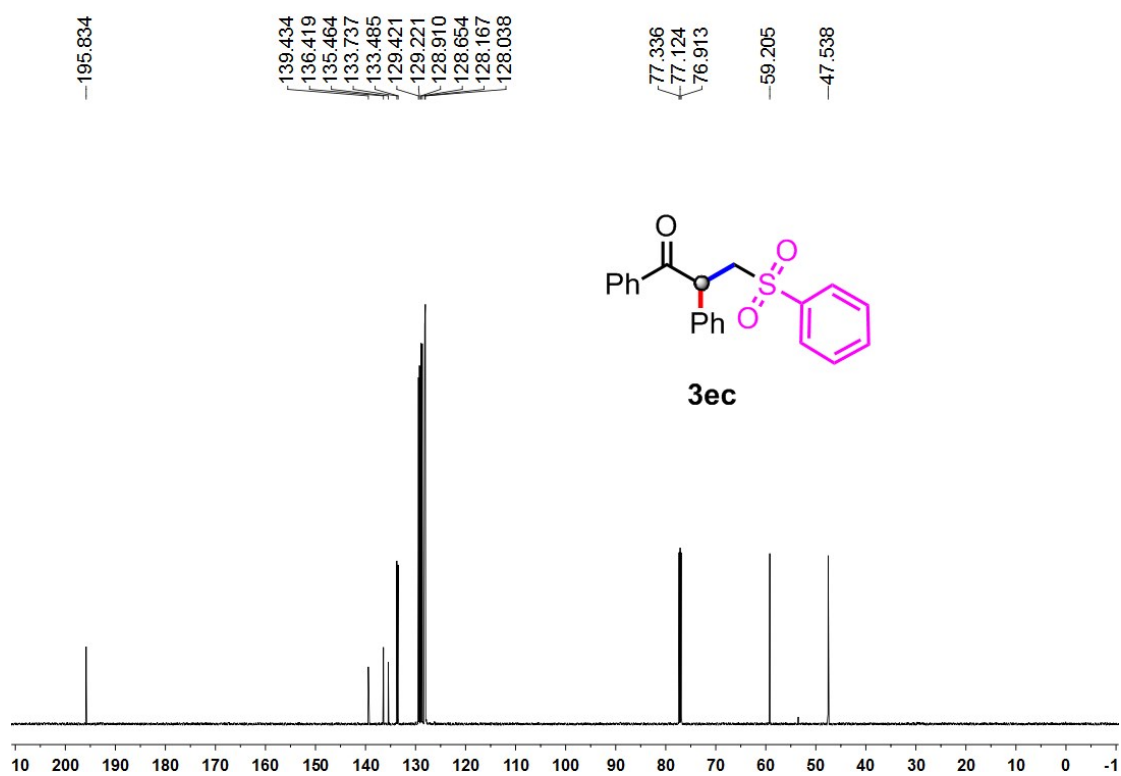

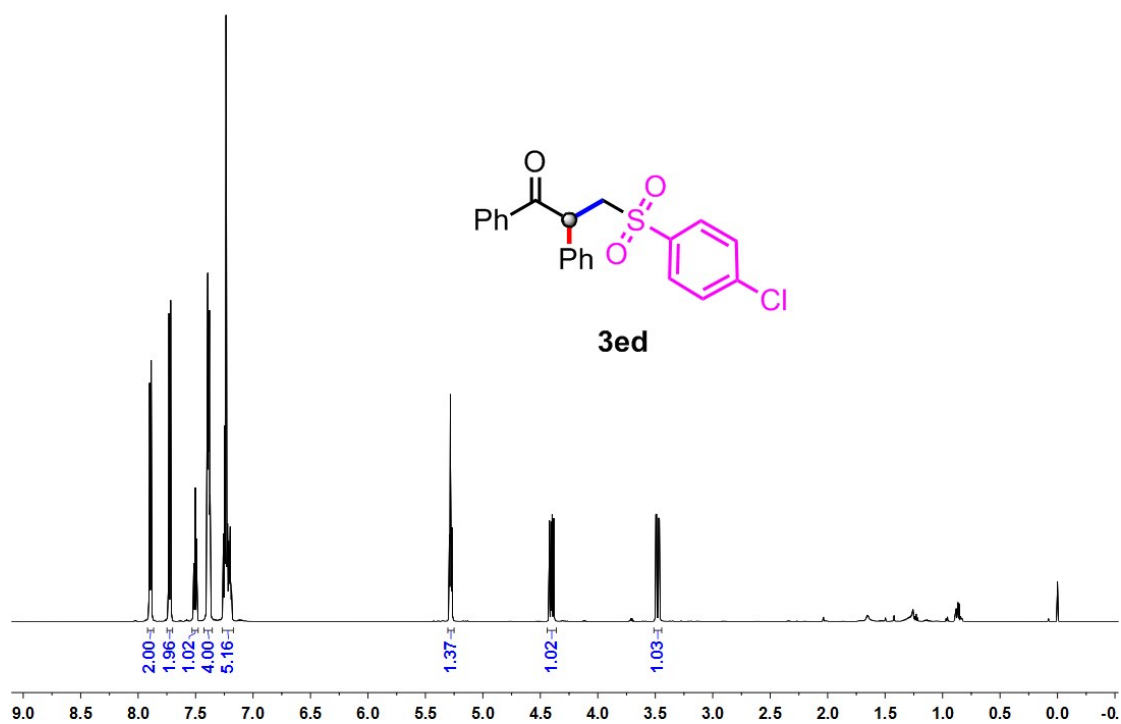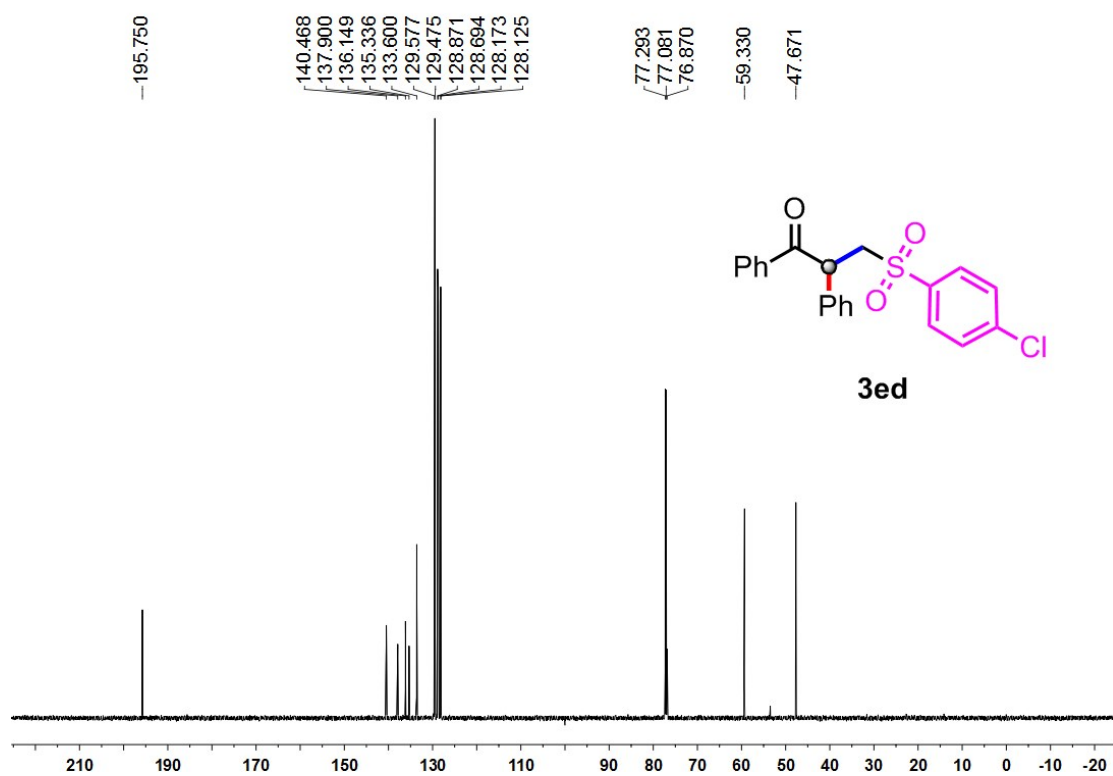

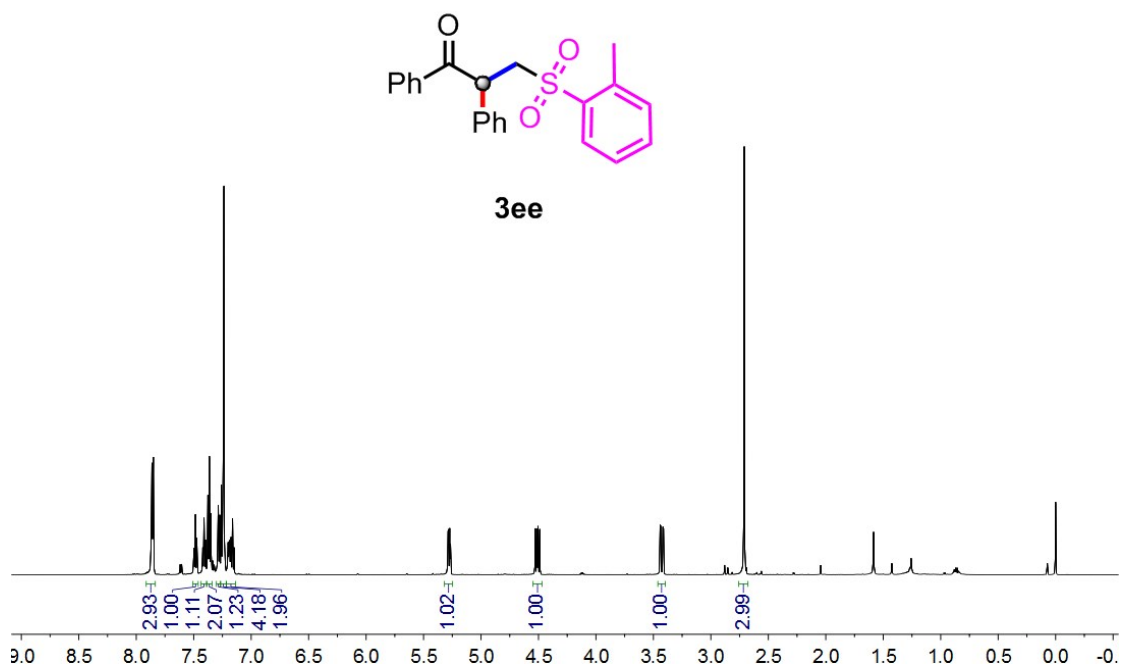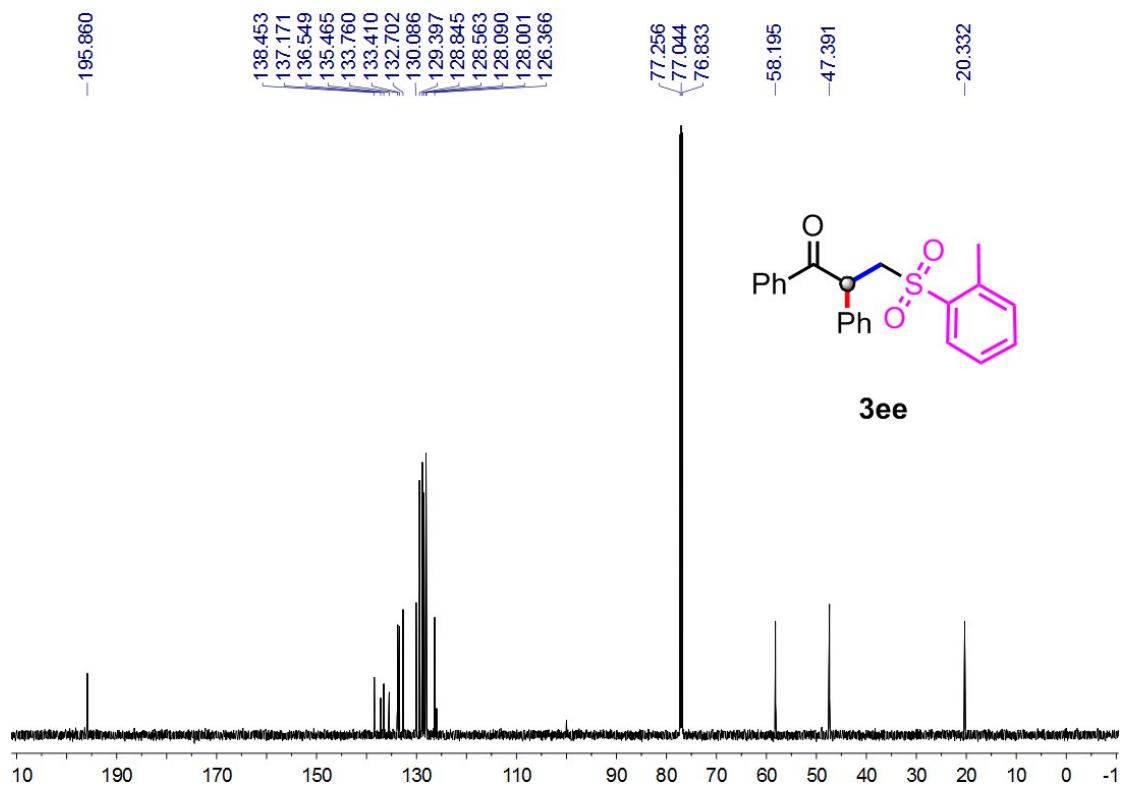

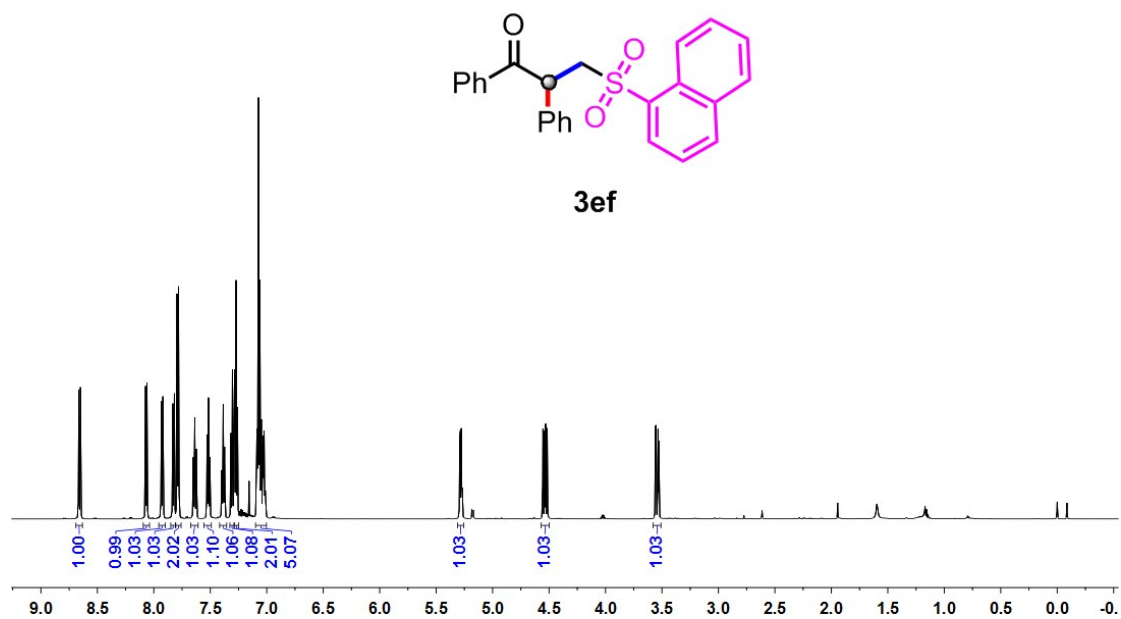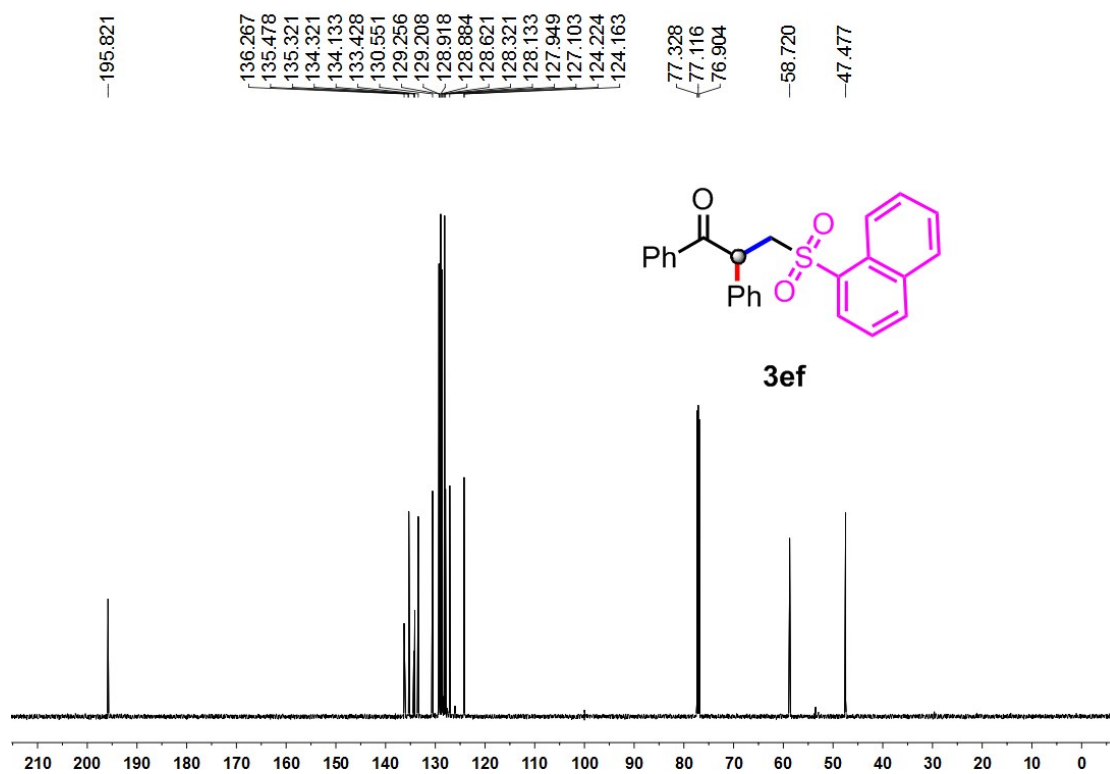

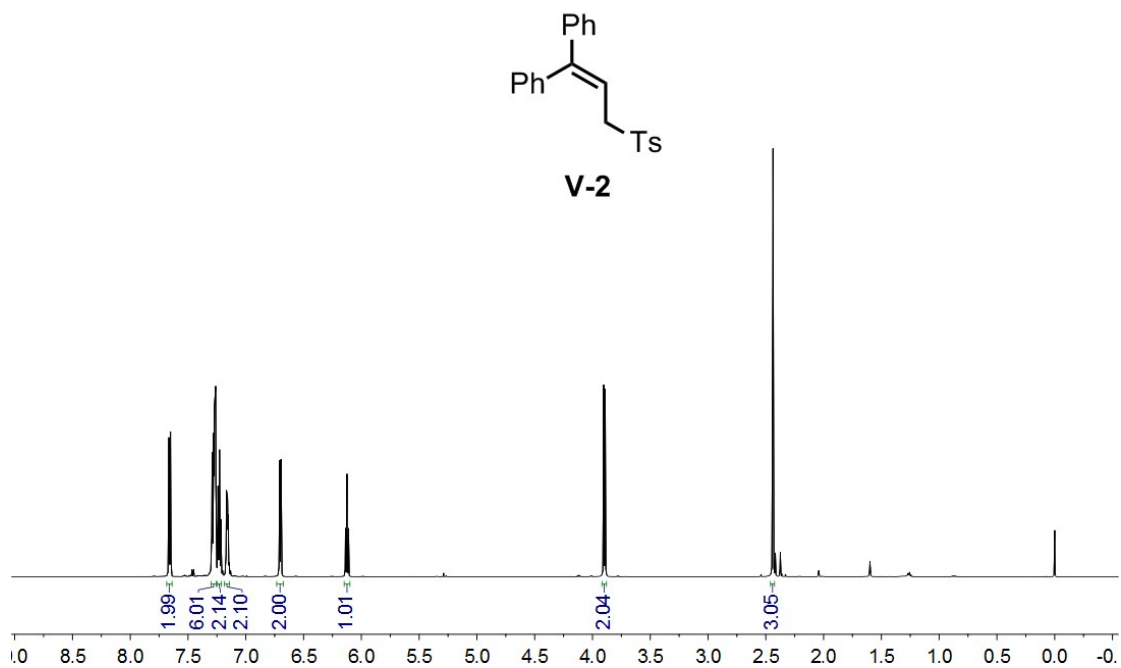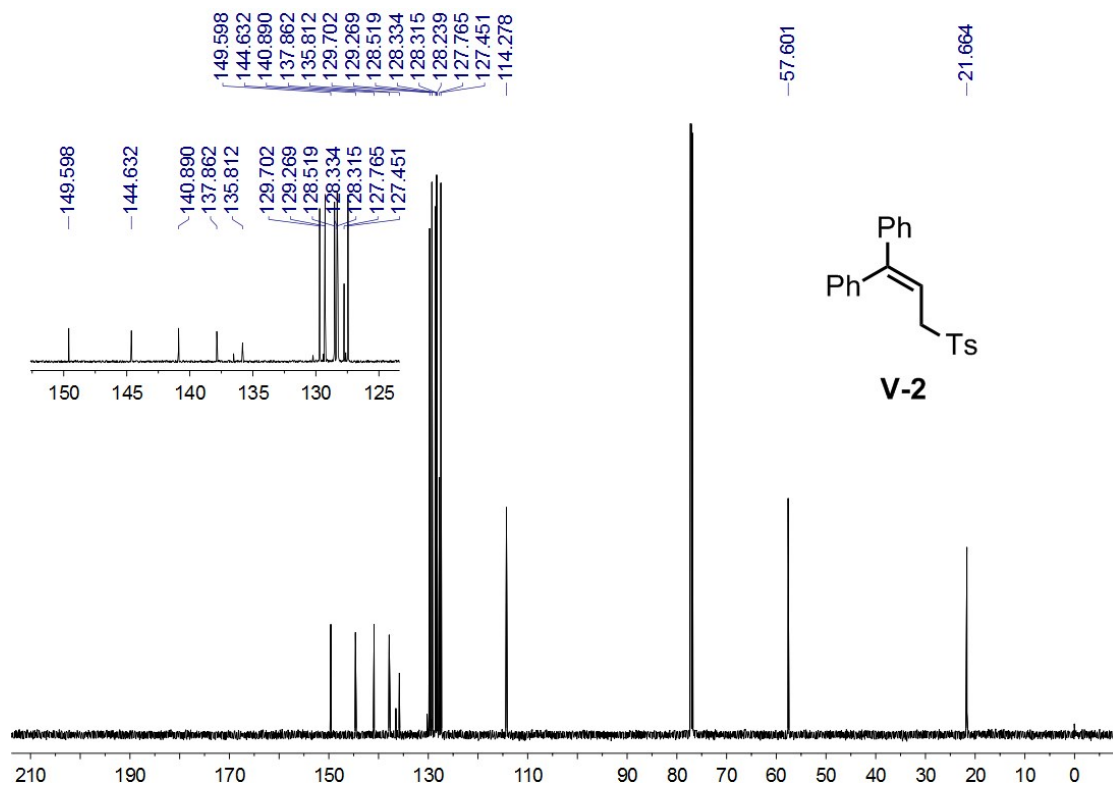

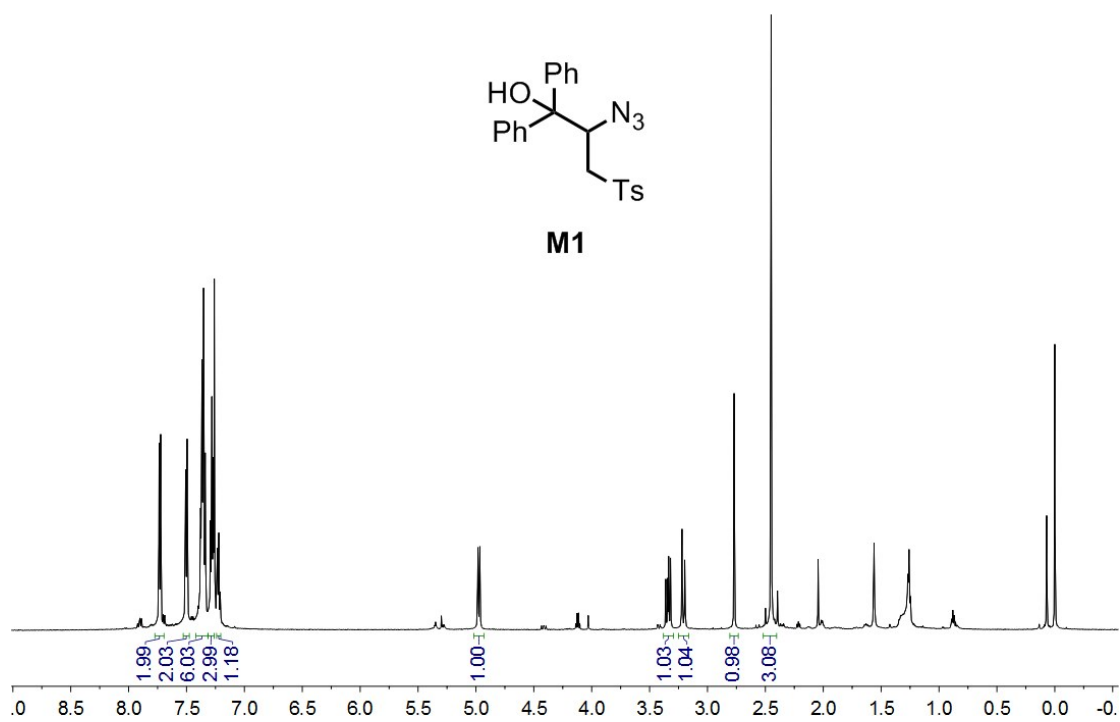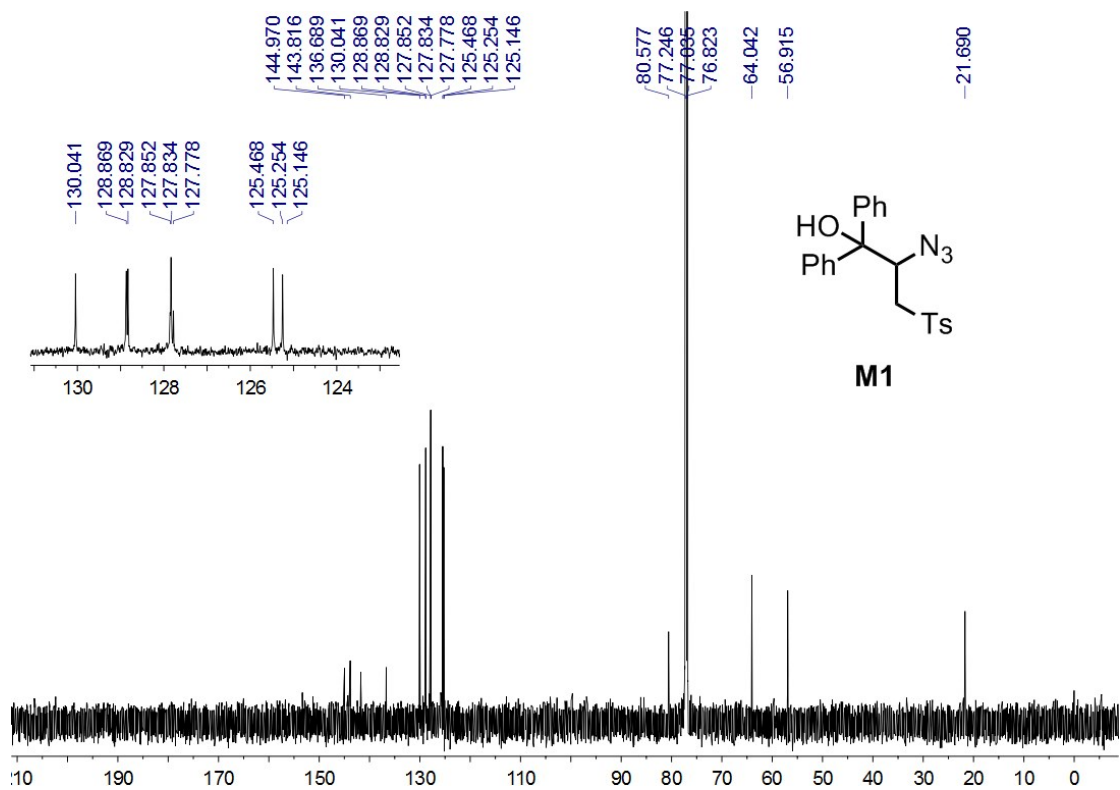

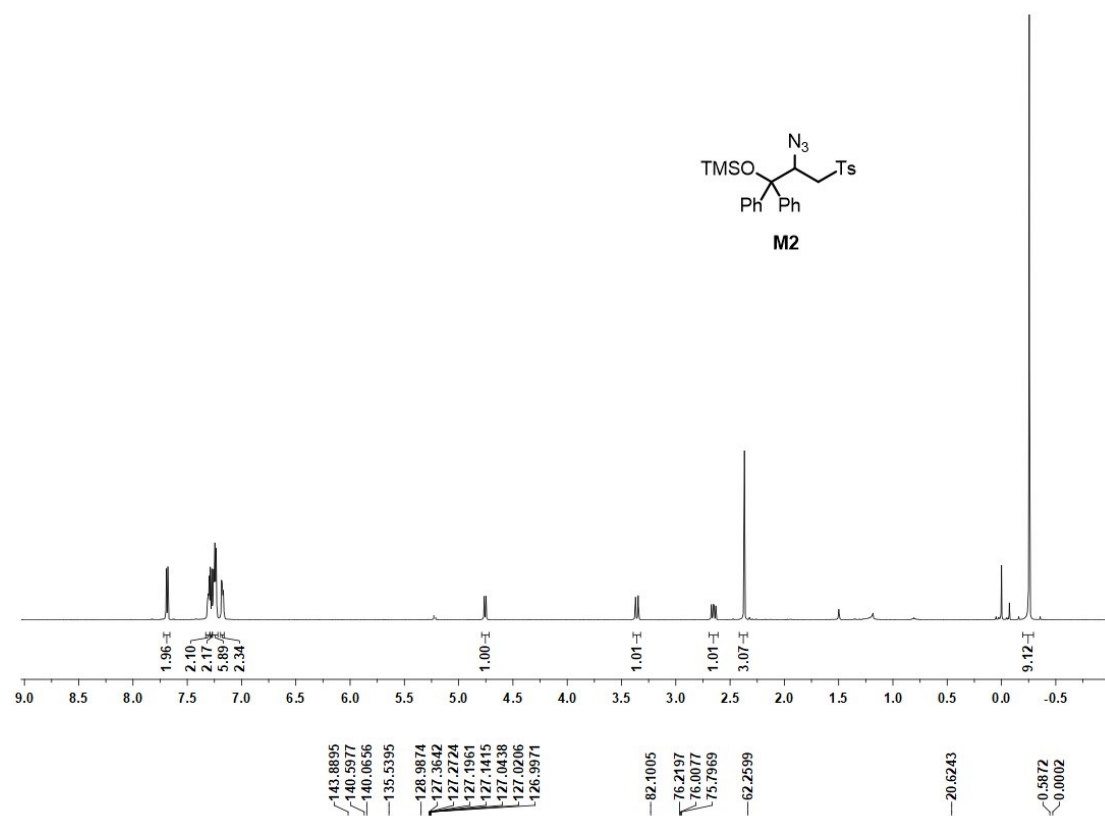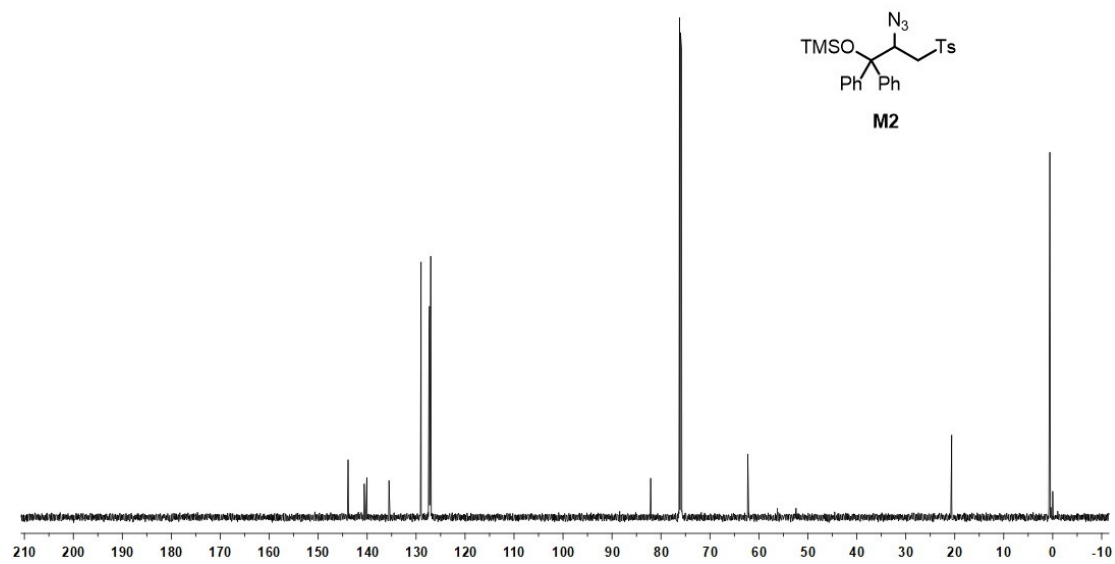

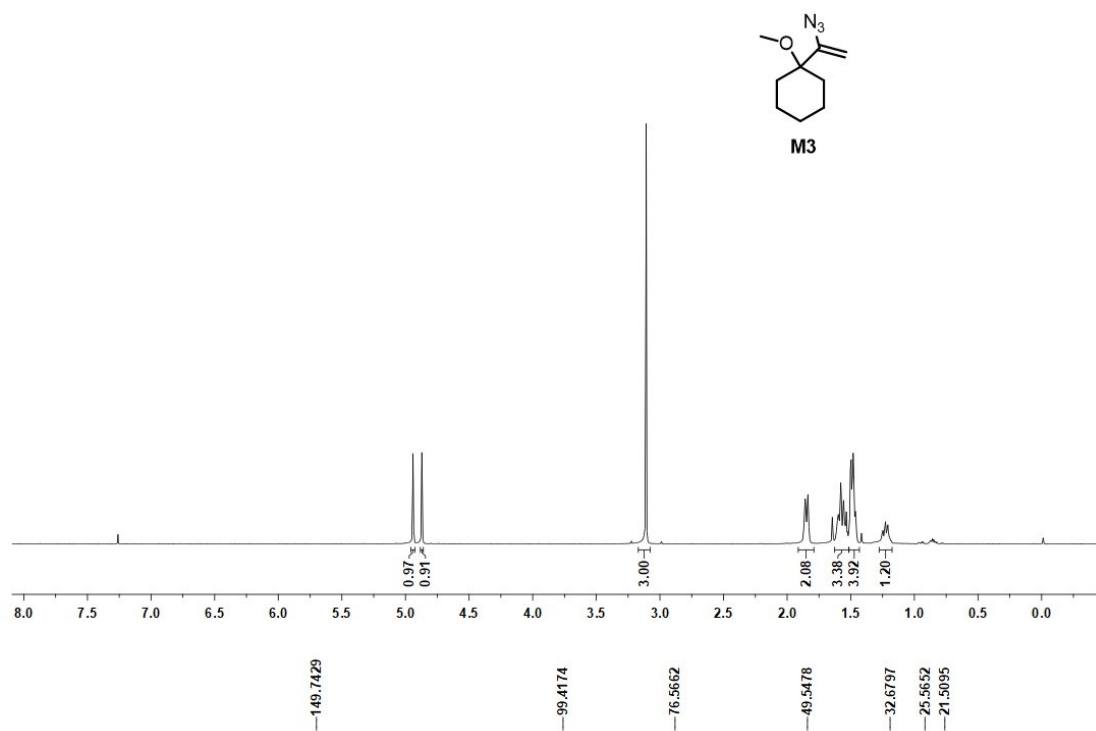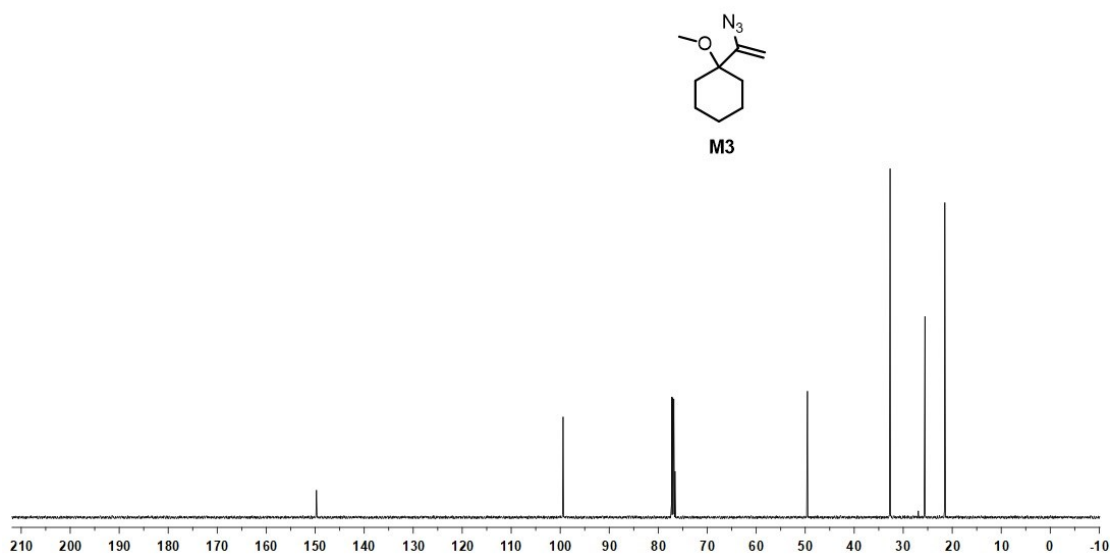



## 7. References

- [1] Liu, Z.; Liu, J.; Zhang, L.; Liao, P.; Song, J.; Bi, X. Silver(I)-catalyzed hydroazidation of ethynyl carbinols: synthesis of 2-azidoallyl alcohols. *Angew. Chem. Int. Ed.* **2014**, *53*, 5305-5309.
- [2] Liu, Z.; Liao, P.; Bi, X. General silver-catalyzed hydroazidation of terminal alkynes by combining TMSN<sub>3</sub> and H<sub>2</sub>O: synthesis of vinyl azides. *Org. Lett.* **2014**, *16*, 3668-3671.
- [3] Magnus, P.; Roe, M. B.; Hulme, C. New trialkylsilyl enol ether chemistry: direct 1,2-bis-azidonation of triisopropylsilyl enol ethers: an azido-radical addition process promoted by TEMPO. *J. Chem. Soc., Chem. Commun.* **1995**, 263-265.
- [4] (a) Yang, Y.; Tang, L.; Zhang, S.; Guo, X.; Zha, Z.; Wang, Z. Catalyst-free sulfonylation of activated alkenes for highly efficient synthesis of mono-substituted ethyl sulfones in water. *Green Chem.* **2014**, *16*, 4106-4109; (b) Sreedhar, B.; Reddy, M. A.; Reddy, P. S. FeCl<sub>3</sub>/TMSCl: an effective catalytic system for the conjugate addition of sodium *p*-toluenesulfinate to  $\alpha,\beta$ -enones. *Synlett.* **2008**, 1949-1952. (c) Bin, Y.; Hua, R. Synthesis of alkyl aryl sulfones *via* reaction of *N*-arylsulfonyl hydroxyamines with electron-deficient alkenes. *Molecules* **2017**, *22*, 39: doi.org/10.3390/molecules22010039.
- [5] Chu, X.; Meng, H.; Xu, X.; Ji, S. One-pot synthesis of allylic sulfones, ketosulfones, and triflyl allylic alcohols from domino reactions of allylic alcohols with sulfinic acid under metal-free conditions. *Chem. Eur. J.* **2015**, *21*, 11359-11368.
- [6] Sun, X.; Li, X.; Song, S.; Zhu, Y.; Liang, Y.; Jiao, N. Mn-catalyzed highly efficient aerobic oxidative hydroxyazidation of olefins: a direct approach to  $\beta$ -azido alcohols. *J. Am. Chem. Soc.* **2015**, *137*, 6059-6066.
